# Supplementary material for: Immunity onset alters plant chromatin and utilizes EDA16 to regulate oxidative homeostasis
Source: PLoS Pathog. 2021 May 20;17(5):e1009572. doi: 10.1371/journal.ppat.1009572 (PMC8171942; doi:10.1371/journal.ppat.1009572)
Supplement: S8 Dataset — (XLSX) [file ppat.1009572.s018.xlsx]

## Sheet: Dataset S8
Dataset S8. eda16-OE flg22-differentially expressed genes Two-week-old eda16-OE seedlings flg22- and mock-treated for 2 hours. RNA-seq data analysed with DEseq2. Yellow: induced genes. Blue: repressed genes (adjusted p-value < 0.05, fold-change > 1.5).
Gene	baseMean	log2FoldChange	lfcSE	stat	pvalue	padj
AT2G19190	2454.67	6.30651	0.250567	25.1689	8.7689e-140	1.98624e-135
AT1G26380	3404.91	5.77694	0.231923	24.9089	5.96231e-137	6.75262e-133
AT2G43620	2371.71	5.25877	0.221497	23.742	1.32987e-124	1.0041e-120
AT2G02010	2163.73	5.29674	0.228874	23.1426	1.7266e-118	9.77731e-115
AT4G01700	2833.59	3.88529	0.182636	21.2734	2.00109e-100	9.06534e-97
AT1G14540	1503.2	4.30883	0.211303	20.3916	1.98365e-92	7.48861e-89
AT1G02360	2035	3.44933	0.175399	19.6656	4.25368e-86	1.37643e-82
AT1G26420	850.194	4.82574	0.255443	18.8916	1.33606e-79	3.78289e-76
AT1G14550	285.488	4.89773	0.259848	18.8484	3.02674e-79	7.61762e-76
AT3G26830	1143.17	4.38773	0.235282	18.6488	1.29099e-77	2.92422e-74
AT1G02930	15785	4.23179	0.231718	18.2627	1.64007e-74	3.3772e-71
AT1G21110	1398.14	2.96723	0.164284	18.0616	6.39278e-73	1.20669e-69
AT2G17740	1388.86	4.78052	0.267266	17.8867	1.49628e-71	2.6071e-68
AT2G38870	5817.76	3.47216	0.195583	17.7529	1.63823e-70	2.65054e-67
AT1G02920	8658.58	4.17048	0.23728	17.5762	3.74958e-69	5.66211e-66
AT1G79680	436.3	4.32684	0.249085	17.3709	1.37061e-67	1.94035e-64
AT4G23280	273.905	5.16295	0.299767	17.2232	1.77775e-66	2.3687e-63
AT1G69920	315.369	4.47415	0.25986	17.2176	1.96095e-66	2.46764e-63
AT1G21120	2175.32	3.84829	0.230791	16.6744	2.01365e-62	2.40058e-59
AT5G42830	636.453	3.17499	0.191961	16.5398	1.89668e-61	2.14808e-58
AT3G16530	17594.3	3.19285	0.196363	16.26	1.89797e-59	2.04719e-56
AT1G51890	1365.78	3.32087	0.205137	16.1886	6.07287e-59	6.25257e-56
AT3G54150	749.665	3.2671	0.201878	16.1835	6.58989e-59	6.48989e-56
AT5G40590	1341.45	3.81275	0.236677	16.1095	2.18744e-58	2.06449e-55
AT1G49000	538.362	4.30522	0.267711	16.0816	3.43337e-58	3.11077e-55
AT1G07160	339.682	4.34472	0.271305	16.0141	1.01799e-57	8.86869e-55
AT3G15356	16045.7	2.95918	0.185436	15.958	2.50727e-57	2.10341e-54
AT5G36925	395.014	4.18031	0.26613	15.7078	1.33742e-55	1.08193e-52
AT4G11170	448.294	4.26628	0.272016	15.6839	1.94858e-55	1.52197e-52
AT5G01550	249.549	4.17774	0.266759	15.6611	2.7899e-55	2.10647e-52
AT5G37600	4676.79	2.2365	0.143821	15.5506	1.57675e-54	1.15209e-51
AT5G24110	267.561	4.16436	0.268352	15.5182	2.61132e-54	1.84841e-51
AT5G64905	323.533	4.27965	0.278667	15.3576	3.15124e-53	2.16299e-50
AT5G25260	478.313	4.0965	0.267664	15.3047	7.11694e-53	4.74135e-50
AT5G65600	327.046	3.86249	0.252666	15.2869	9.34399e-53	6.04716e-50
AT2G47550	882.077	3.05532	0.20214	15.1149	1.29227e-51	8.1309e-49
AT1G66700	155.578	4.39895	0.295365	14.8933	3.64461e-50	2.23119e-47
AT5G57220	2080.9	2.82512	0.190667	14.817	1.13704e-49	6.77768e-47
AT5G01540	995.796	3.30259	0.224546	14.7079	5.73781e-49	3.33249e-46
AT2G25297	217.522	4.0596	0.277442	14.6322	1.74942e-48	9.9065e-46
AT1G57630	368.609	3.80721	0.26152	14.558	5.19644e-48	2.87084e-45
AT1G74360	1287.84	3.10881	0.218068	14.2561	4.10507e-46	2.2139e-43
AT2G18690	2700.94	2.81835	0.202296	13.9318	4.06205e-44	2.13975e-41
AT1G65690	830.448	2.94648	0.211556	13.9277	4.30184e-44	2.21457e-41
AT1G36622	578.383	3.67553	0.265536	13.8419	1.42378e-43	7.16669e-41
AT3G63380	3190.87	3.52132	0.256363	13.7357	6.20727e-43	3.05654e-40
AT2G44370	1799.83	2.97216	0.216733	13.7135	8.43247e-43	4.06391e-40
AT2G38860	2901.86	2.83917	0.212087	13.3868	7.22445e-41	3.40919e-38
AT1G26410	190.314	4.06451	0.303976	13.3712	8.91471e-41	4.12096e-38
AT5G25250	2042.68	3.26656	0.246222	13.2667	3.60973e-40	1.63528e-37
AT1G51800	5399.82	3.14267	0.236966	13.2621	3.84108e-40	1.70597e-37
AT1G69930	684.573	3.40473	0.257124	13.2416	5.0474e-40	2.19863e-37
AT5G23510	1815.63	2.45513	0.185503	13.235	5.51148e-40	2.35548e-37
AT2G46430	570.744	2.42403	0.183177	13.2332	5.63987e-40	2.36572e-37
AT4G08770	2835.06	2.45893	0.186232	13.2036	8.36175e-40	3.44367e-37
AT2G18680	326.79	3.45617	0.262109	13.186	1.05649e-39	4.27333e-37
AT4G14365	868.45	2.49497	0.189536	13.1636	1.42124e-39	5.6478e-37
AT1G30700	2304.96	2.52432	0.191924	13.1527	1.64233e-39	6.41388e-37
AT1G33030	211.287	3.41244	0.260486	13.1003	3.28068e-39	1.2595e-36
AT3G28930	1824.84	2.30068	0.176584	13.0288	8.39425e-39	3.16897e-36
AT5G64890	122.63	3.66067	0.282302	12.9672	1.87684e-38	6.96922e-36
AT4G03460	461.253	2.98439	0.231055	12.9163	3.64072e-38	1.3301e-35
AT4G20780	849.117	2.26282	0.175516	12.8924	4.96503e-38	1.78512e-35
AT3G15518	291.88	3.59595	0.278954	12.8908	5.07031e-38	1.7945e-35
AT1G30755	1274.15	2.28781	0.179068	12.7762	2.22704e-37	7.76072e-35
AT2G39200	3309.69	3.15634	0.247363	12.7599	2.74471e-37	9.41977e-35
AT1G67980	301.31	3.0968	0.247937	12.4903	8.43718e-36	2.8524e-33
AT1G53625	640.739	3.50724	0.280846	12.4881	8.66708e-36	2.88703e-33
AT2G15390	1002.12	2.29272	0.183953	12.4636	1.17938e-35	3.87162e-33
AT5G44910	471.044	2.40807	0.193774	12.4272	1.86051e-35	6.02035e-33
AT5G48400	306.245	3.29692	0.26539	12.423	1.96165e-35	6.25036e-33
AT5G55090	349.791	2.87558	0.231492	12.4219	1.98678e-35	6.25036e-33
AT3G18250	220.195	3.28814	0.266695	12.3292	6.30696e-35	1.95697e-32
AT5G48540	1462.34	2.30484	0.188024	12.2583	1.51729e-34	4.64434e-32
AT5G11670	21388.8	2.10214	0.173157	12.1401	6.47472e-34	1.95545e-31
AT1G61360	1728.57	2.48207	0.205191	12.0964	1.10358e-33	3.28909e-31
AT4G01750	835.972	2.242	0.185533	12.0841	1.28158e-33	3.77001e-31
AT2G26150	383.822	3.15254	0.261497	12.0557	1.80931e-33	5.25419e-31
AT5G25930	1848.82	2.63713	0.219235	12.0288	2.50782e-33	7.19047e-31
AT1G52200	5473.85	2.34452	0.195186	12.0117	3.08278e-33	8.7285e-31
AT4G40020	199.86	3.12766	0.261788	11.9473	6.70803e-33	1.87585e-30
AT1G14870	4207.66	1.89657	0.159803	11.8682	1.73237e-32	4.78536e-30
AT4G20000	162.829	3.01822	0.254861	11.8426	2.35091e-32	6.41573e-30
AT2G40180	172.013	3.13309	0.264905	11.8272	2.82425e-32	7.61571e-30
AT3G19615	195.739	3.2936	0.278908	11.8089	3.51026e-32	9.35424e-30
AT4G22710	481.577	2.8646	0.242762	11.8	3.90146e-32	1.02758e-29
AT5G12030	567.752	3.37	0.286607	11.7582	6.40552e-32	1.66772e-29
AT2G26440	656.625	2.07855	0.177562	11.706	1.1872e-31	3.05583e-29
AT3G07195	527.456	2.51719	0.215456	11.6831	1.55531e-31	3.92816e-29
AT5G35735	4109.23	2.34264	0.200521	11.6828	1.56079e-31	3.92816e-29
AT1G16150	315.959	2.73512	0.234693	11.654	2.1884e-31	5.4472e-29
AT5G67340	527.938	2.58056	0.221697	11.64	2.579e-31	6.34967e-29
AT4G22980	264.096	3.07094	0.264016	11.6316	2.84625e-31	6.9323e-29
AT4G35180	337.085	2.89667	0.250005	11.5864	4.82714e-31	1.16319e-28
AT5G01560	234.524	3.06553	0.26662	11.4978	1.35385e-30	3.22801e-28
AT1G19020	1724.79	2.39002	0.2088	11.4465	2.44873e-30	5.77773e-28
AT3G13950	194.379	3.16284	0.276504	11.4387	2.67924e-30	6.25644e-28
AT3G51660	777.695	2.2136	0.19451	11.3804	5.23758e-30	1.21058e-27
AT5G52640	3661.84	2.78018	0.244671	11.3629	6.39819e-30	1.46389e-27
AT1G74310	2543.4	2.80621	0.248257	11.3037	1.25866e-29	2.85099e-27
AT2G35980	261.025	3.22308	0.28628	11.2585	2.10387e-29	4.71829e-27
AT5G48657	664.984	2.50773	0.222773	11.2569	2.14184e-29	4.75635e-27
AT4G04540	147.479	3.67497	0.326684	11.2493	2.33351e-29	5.13169e-27
AT5G38900	204.007	3.19243	0.284243	11.2313	2.86131e-29	6.23188e-27
AT4G23170	245.996	2.62092	0.234255	11.1883	4.65182e-29	1.00351e-26
AT4G25110	607.062	2.33772	0.210092	11.1271	9.25818e-29	1.97837e-26
AT4G25900	2604.51	1.9053	0.171414	11.1152	1.05865e-28	2.24107e-26
AT4G23550	843.8	2.1879	0.19699	11.1067	1.16392e-28	2.44111e-26
AT3G60120	72.4967	3.58768	0.32335	11.0954	1.32121e-28	2.74557e-26
AT3G09405	335.118	2.64593	0.239619	11.0422	2.39024e-28	4.92194e-26
AT5G48430	2589.54	2.56109	0.232844	10.9991	3.85791e-28	7.87256e-26
AT1G51790	1924.41	2.50547	0.228731	10.9538	6.37284e-28	1.28885e-25
AT5G11210	167.212	3.24175	0.295983	10.9525	6.46579e-28	1.29608e-25
AT3G02840	209.585	3.08085	0.28225	10.9153	9.73989e-28	1.93525e-25
AT5G12930	620.553	2.24066	0.205522	10.9023	1.12387e-27	2.21362e-25
AT3G54420	869.928	2.21196	0.20323	10.884	1.37346e-27	2.68191e-25
AT5G54860	745.975	2.2572	0.207591	10.8733	1.54503e-27	2.99115e-25
AT1G61560	898.051	2.51045	0.231312	10.8531	1.92758e-27	3.70013e-25
AT4G21380	511.444	2.30973	0.212851	10.8514	1.96492e-27	3.74013e-25
AT3G16525	123.662	3.6208	0.333727	10.8496	2.00298e-27	3.7808e-25
AT4G34180	4482.84	1.79176	0.165442	10.8301	2.47848e-27	4.63966e-25
AT5G05190	712.542	2.16398	0.200066	10.8163	2.88126e-27	5.34945e-25
AT1G66880	891.31	1.99813	0.184928	10.8049	3.26179e-27	6.00674e-25
AT1G51820	1932.21	2.65053	0.246256	10.7633	5.13031e-27	9.37151e-25
AT4G21390	988.989	2.43484	0.226233	10.7625	5.17296e-27	9.37381e-25
AT2G35930	2191.58	2.37662	0.221237	10.7424	6.43315e-27	1.15649e-24
AT3G26500	821.792	2.40452	0.224679	10.702	9.9595e-27	1.77632e-24
AT1G64400	1375.73	2.26382	0.212529	10.6518	1.71012e-26	3.02625e-24
AT4G33050	4789.13	2.0339	0.191136	10.6411	1.91836e-26	3.36844e-24
AT5G02490	1285.75	2.39237	0.225264	10.6203	2.3971e-26	4.17666e-24
AT1G70140	508.327	2.04032	0.192454	10.6016	2.9287e-26	5.06397e-24
AT5G62150	170.899	2.59442	0.246046	10.5445	5.38829e-26	9.24622e-24
AT4G18250	312.343	2.19475	0.208211	10.541	5.59128e-26	9.52241e-24
AT2G30770	56.845	3.5497	0.336925	10.5356	5.92116e-26	1.0005e-23
AT1G56240	368.155	2.71487	0.257701	10.5349	5.96301e-26	1.0005e-23
AT3G55150	504.767	2.50769	0.238374	10.52	6.98843e-26	1.16393e-23
AT1G09932	587.592	2.40983	0.229473	10.5016	8.49433e-26	1.40442e-23
AT5G48410	171.503	2.66372	0.253694	10.4998	8.65927e-26	1.42131e-23
AT2G33710	319.348	2.38627	0.227315	10.4976	8.85618e-26	1.44317e-23
AT3G19010	3575.41	1.93037	0.184689	10.452	1.43472e-25	2.30656e-23
AT2G37430	369.852	3.1047	0.297046	10.4519	1.43581e-25	2.30656e-23
AT3G09010	316.111	2.23937	0.215101	10.4108	2.21296e-25	3.52998e-23
AT1G25220	1604.38	2.03009	0.195036	10.4088	2.26047e-25	3.58055e-23
AT1G16160	146.265	2.50842	0.241935	10.3682	3.46134e-25	5.44464e-23
AT4G28420	44.4443	3.52302	0.340111	10.3584	3.83168e-25	5.98562e-23
AT3G52450	1716.73	2.28893	0.221046	10.355	3.97214e-25	6.16253e-23
AT2G39380	707.558	2.3615	0.228275	10.345	4.40997e-25	6.79525e-23
AT4G23810	417.74	2.55645	0.247779	10.3174	5.87686e-25	8.99438e-23
AT4G15233	998.743	1.87566	0.181847	10.3145	6.05923e-25	9.21125e-23
AT4G19370	357.814	2.23887	0.217426	10.2972	7.25564e-25	1.09565e-22
AT4G23210	216.199	2.43567	0.236616	10.2938	7.51762e-25	1.12769e-22
AT3G48640	131.165	2.98363	0.290065	10.2861	8.14308e-25	1.21348e-22
AT4G35110	786.898	2.21504	0.215536	10.2769	8.95873e-25	1.3263e-22
AT1G67270	64.2506	3.35051	0.327422	10.233	1.41102e-24	2.07539e-22
AT1G51620	267.632	2.52262	0.247188	10.2053	1.87797e-24	2.74439e-22
AT1G30420	1518.26	1.89167	0.185417	10.2022	1.93779e-24	2.81364e-22
AT2G27389	247.087	2.40623	0.235976	10.1969	2.0463e-24	2.95228e-22
AT4G22530	1141.82	2.52032	0.248309	10.1499	3.31574e-24	4.75347e-22
AT4G08850	6463.4	1.74297	0.172022	10.1322	3.97433e-24	5.66179e-22
AT1G78850	12461.8	1.63231	0.16128	10.121	4.45997e-24	6.31393e-22
AT2G30870	16247.3	1.74613	0.172572	10.1182	4.58556e-24	6.4514e-22
AT4G20830	12860.7	2.23026	0.220614	10.1093	5.02266e-24	7.02274e-22
AT3G49110	1861.14	1.90391	0.188675	10.091	6.0577e-24	8.41797e-22
AT5G12020	426.172	2.96482	0.294786	10.0576	8.50903e-24	1.17523e-21
AT3G11840	319.152	1.92161	0.191189	10.0508	9.10853e-24	1.25041e-21
AT5G44990	60.5725	3.38007	0.336375	10.0485	9.32538e-24	1.27247e-21
AT3G21305	66.7201	3.25604	0.324679	10.0285	1.14245e-23	1.54956e-21
AT4G39670	438.3	2.41516	0.24095	10.0235	1.20195e-23	1.62055e-21
AT1G28190	1057.85	2.09505	0.209046	10.022	1.22065e-23	1.63604e-21
AT1G22810	98.1193	3.22527	0.322242	10.0089	1.39361e-23	1.85687e-21
AT5G25440	633.849	1.90921	0.19077	10.0079	1.40685e-23	1.86354e-21
AT4G28350	557.107	2.23806	0.224069	9.98828	1.71538e-23	2.25901e-21
AT4G23030	218.373	2.53507	0.254092	9.97697	1.92244e-23	2.51707e-21
AT3G46280	7013.26	2.45233	0.24605	9.9668	2.12981e-23	2.77255e-21
AT1G13480	521.666	2.03975	0.205085	9.94584	2.62939e-23	3.40333e-21
AT3G09520	290.756	2.52434	0.253839	9.94469	2.66004e-23	3.42344e-21
AT4G23010	1894.3	1.70948	0.172319	9.92042	3.39323e-23	4.34237e-21
AT4G21120	594.198	2.30009	0.232133	9.90849	3.82387e-23	4.86598e-21
AT1G59860	164.532	2.6521	0.268039	9.89445	4.40018e-23	5.56807e-21
AT4G16820	96.8021	3.05262	0.310873	9.81953	9.27795e-23	1.16753e-20
AT4G11890	293.244	2.66735	0.271731	9.81616	9.59269e-23	1.20046e-20
AT1G08050	700.477	2.34842	0.239964	9.78655	1.28607e-22	1.60059e-20
AT4G39830	187.554	2.47477	0.253336	9.76873	1.53356e-22	1.89818e-20
AT3G57460	166.675	3.13359	0.320933	9.764	1.60686e-22	1.9781e-20
AT2G36690	974.569	2.65305	0.272366	9.74075	2.02059e-22	2.47396e-20
AT5G11140	62.7659	3.18713	0.327228	9.73979	2.03975e-22	2.48399e-20
AT1G33590	5949.62	1.42063	0.146147	9.7206	2.46318e-22	2.98361e-20
AT2G29720	1464.19	2.29429	0.236759	9.69038	3.31284e-22	3.99145e-20
AT5G37490	82.0107	3.15314	0.326139	9.6681	4.1196e-22	4.9372e-20
AT4G13420	194.462	2.37509	0.24622	9.64619	5.10172e-22	6.08206e-20
AT3G28210	1044.36	2.54243	0.263822	9.63691	5.58414e-22	6.58783e-20
AT1G51850	1539.61	1.95313	0.202669	9.63707	5.57575e-22	6.58783e-20
AT5G13490	3234.1	1.88491	0.195776	9.62792	6.09506e-22	7.15333e-20
AT4G23190	1572.59	1.99257	0.207506	9.60247	7.80508e-22	9.11303e-20
AT2G39518	1443.7	2.4999	0.260666	9.59043	8.77186e-22	1.01893e-19
AT2G29350	179.954	2.70571	0.282166	9.58907	8.88833e-22	1.02719e-19
AT3G25610	1224.31	1.82932	0.191009	9.57709	9.98137e-22	1.14765e-19
AT3G46230	395.207	2.8562	0.298704	9.56199	1.15511e-21	1.32144e-19
AT5G18470	421.608	1.99883	0.209229	9.55334	1.25578e-21	1.42937e-19
AT4G18430	253.39	2.42416	0.253914	9.54717	1.33292e-21	1.5096e-19
AT4G05020	1215.74	1.9753	0.207299	9.52873	1.59213e-21	1.77677e-19
AT1G18570	1415.69	1.81651	0.190635	9.52874	1.59199e-21	1.77677e-19
AT2G44790	4476.96	1.37557	0.144361	9.52872	1.59236e-21	1.77677e-19
AT2G43590	1032.68	2.13772	0.224554	9.51985	1.73437e-21	1.92574e-19
AT4G11470	67.861	3.0059	0.316166	9.50734	1.95592e-21	2.16115e-19
AT1G07000	1554.39	1.80952	0.190362	9.50566	1.98786e-21	2.18578e-19
AT4G23220	179.86	2.48502	0.262143	9.47963	2.55187e-21	2.79239e-19
AT3G54640	3205.1	1.80593	0.190567	9.47663	2.62625e-21	2.85996e-19
AT4G03450	93.1546	2.96846	0.313263	9.47593	2.64382e-21	2.86532e-19
AT1G05675	1177.05	2.50776	0.265061	9.46105	3.04865e-21	3.25731e-19
AT1G05300	400.558	2.0726	0.219067	9.46106	3.04836e-21	3.25731e-19
AT4G39270	712.542	1.46953	0.155506	9.45	3.38835e-21	3.60326e-19
AT3G28940	4423.86	1.25578	0.133194	9.42818	4.17279e-21	4.41673e-19
AT5G39020	405.423	1.84322	0.195826	9.41257	4.8415e-21	5.10069e-19
AT1G13550	84.2901	2.72149	0.289332	9.40611	5.14817e-21	5.39867e-19
AT1G71400	620.209	1.54503	0.165032	9.36203	7.82177e-21	8.16456e-19
AT1G13110	4657.9	1.34176	0.143506	9.34986	8.77648e-21	9.11909e-19
AT1G66920	570.747	2.0015	0.21441	9.33492	1.01065e-20	1.04531e-18
AT3G59700	378.388	2.02597	0.217225	9.32659	1.09326e-20	1.12561e-18
AT4G21920	152.159	2.42417	0.260228	9.31554	1.21331e-20	1.24356e-18
AT3G08970	358.791	2.35214	0.253346	9.28431	1.62758e-20	1.66064e-18
AT2G13790	1382.66	1.71779	0.185044	9.28313	1.64574e-20	1.67164e-18
AT2G39530	534.493	1.84197	0.19856	9.27665	1.74895e-20	1.76854e-18
AT3G02240	239.476	2.32524	0.250939	9.26614	1.92997e-20	1.94292e-18
AT3G44830	73.0814	3.13604	0.338906	9.25342	2.17431e-20	2.17922e-18
AT2G47140	467.935	2.13257	0.230778	9.24076	2.44745e-20	2.44217e-18
AT1G13520	244.372	2.1029	0.227874	9.22835	2.74838e-20	2.73041e-18
AT5G64510	271.07	2.49062	0.270982	9.19112	3.88784e-20	3.84557e-18
AT1G62300	1856.2	1.84953	0.202195	9.14728	5.83867e-20	5.75007e-18
AT5G57010	173.962	2.47422	0.270685	9.14058	6.21198e-20	6.09124e-18
AT3G05360	775.212	2.07151	0.22689	9.13002	6.84881e-20	6.65804e-18
AT5G26920	1013.19	1.58176	0.173246	9.13012	6.84209e-20	6.65804e-18
AT1G28480	271.901	2.53195	0.277402	9.12735	7.01978e-20	6.79509e-18
AT5G12420	839.049	2.15992	0.237055	9.11149	8.12589e-20	7.83232e-18
AT5G45000	136.344	2.44656	0.269259	9.08626	1.02505e-19	9.83827e-18
AT1G78000	2059.89	1.41878	0.156284	9.0782	1.10383e-19	1.05497e-17
AT2G20560	604.228	2.22677	0.245488	9.07081	1.18135e-19	1.12432e-17
AT5G01100	430.403	2.18249	0.240786	9.06404	1.25707e-19	1.19138e-17
AT5G64750	1191.32	2.45831	0.271794	9.04475	1.50003e-19	1.41572e-17
AT5G56960	126.444	3.0059	0.332708	9.03462	1.64567e-19	1.54673e-17
AT5G48530	959.355	2.25381	0.249661	9.02747	1.75679e-19	1.64434e-17
AT2G42060	258.986	1.9746	0.219468	8.99721	2.31526e-19	2.15814e-17
AT1G32960	168.99	2.67315	0.297249	8.99297	2.40642e-19	2.23393e-17
AT3G22060	4133.24	1.8812	0.2092	8.99236	2.4197e-19	2.23708e-17
AT5G44820	151.993	2.07436	0.230798	8.98778	2.5227e-19	2.32283e-17
AT3G09440	12194.1	1.83129	0.204127	8.97133	2.92963e-19	2.6866e-17
AT2G46240	1005.07	2.02874	0.226309	8.96447	3.11764e-19	2.84749e-17
AT2G29500	854.649	2.11516	0.236185	8.95553	3.38097e-19	3.0756e-17
AT1G33600	2840.73	1.42003	0.158837	8.9402	3.88477e-19	3.51976e-17
AT2G34500	613.751	2.38839	0.267236	8.93737	3.98536e-19	3.59651e-17
AT1G30757	168.461	2.25203	0.252101	8.93307	4.14344e-19	3.70961e-17
AT5G47730	1196.82	1.81198	0.202833	8.93335	4.13285e-19	3.70961e-17
AT4G12400	1965.25	2.11747	0.239186	8.85281	8.5343e-19	7.61065e-17
AT1G47130	86.0829	2.85819	0.324119	8.81834	1.16164e-18	1.03185e-16
AT5G54810	10581.7	1.77933	0.201802	8.8172	1.17356e-18	1.03837e-16
AT1G27020	3478.03	1.63043	0.185014	8.81251	1.22379e-18	1.07861e-16
AT5G40780	2299.17	1.88298	0.213826	8.80616	1.29512e-18	1.13704e-16
AT4G10530	55.9758	2.87769	0.327505	8.7867	1.54019e-18	1.34698e-16
AT1G64710	1127.32	1.67251	0.190895	8.76137	1.92884e-18	1.68039e-16
AT2G04400	2401.44	1.55074	0.177065	8.75803	1.98701e-18	1.71785e-16
AT3G21630	1840.85	1.57426	0.180051	8.74338	2.26234e-18	1.94845e-16
AT1G18390	1158.58	1.72725	0.197877	8.7289	2.57158e-18	2.2064e-16
AT5G48570	1982.25	2.25318	0.258194	8.72668	2.62249e-18	2.24158e-16
AT5G39580	4319.04	2.1956	0.252001	8.71267	2.96806e-18	2.52742e-16
AT1G16420	231.631	1.95977	0.224989	8.71053	3.02453e-18	2.56587e-16
AT2G25470	82.8469	2.60286	0.299073	8.70307	3.23028e-18	2.72706e-16
AT1G61420	414.146	1.80929	0.207898	8.70278	3.23862e-18	2.72706e-16
AT1G61370	508.199	1.73273	0.199224	8.6974	3.39565e-18	2.8487e-16
AT4G21680	874.989	2.41314	0.27816	8.67538	4.12174e-18	3.44508e-16
AT2G15480	6743.86	2.07844	0.240179	8.65373	4.98437e-18	4.15077e-16
AT4G37370	2020.95	2.20173	0.254577	8.64861	5.21321e-18	4.32544e-16
AT5G54165	105.924	2.68246	0.310372	8.64273	5.48872e-18	4.53741e-16
AT4G37900	524.203	1.68998	0.195857	8.62865	6.20828e-18	5.11359e-16
AT5G67310	69.2324	2.71512	0.315148	8.61536	6.97214e-18	5.72195e-16
AT1G32350	158.006	2.66566	0.310152	8.59469	8.34894e-18	6.82714e-16
AT4G15417	120.775	2.39639	0.279064	8.58722	8.90966e-18	7.25945e-16
AT2G36770	560.562	2.19412	0.25559	8.58455	9.11941e-18	7.40372e-16
AT5G03630	10313.7	1.70678	0.199382	8.56035	1.12527e-17	9.07063e-16
AT3G47380	244.272	2.31833	0.270857	8.55925	1.13603e-17	9.12489e-16
AT4G23130	98.0858	2.26699	0.265161	8.5495	1.23623e-17	9.89463e-16
AT4G20835	96.5182	2.88911	0.337951	8.54891	1.24259e-17	9.91055e-16
AT4G35630	3172.63	1.70774	0.199961	8.54034	1.33833e-17	1.06367e-15
AT4G14450	51.4779	2.93203	0.343981	8.52381	1.54384e-17	1.22271e-15
AT5G33290	602.172	1.68136	0.197699	8.50464	1.8216e-17	1.43767e-15
AT4G31550	1941.79	1.67346	0.196996	8.49487	1.98148e-17	1.55842e-15
AT3G01830	215.716	2.55058	0.300313	8.4931	2.01196e-17	1.57692e-15
AT4G26910	2473.93	1.39224	0.164265	8.47554	2.33997e-17	1.8214e-15
AT1G56250	219.283	2.59908	0.306649	8.47573	2.33616e-17	1.8214e-15
AT4G25350	164.358	2.11142	0.249311	8.469	2.47514e-17	1.92002e-15
AT4G23700	1082.69	1.77011	0.20921	8.46091	2.65299e-17	2.05095e-15
AT2G39210	2488.5	1.82553	0.216345	8.43805	3.22686e-17	2.48611e-15
AT3G47480	192.926	2.12188	0.251697	8.43027	3.4487e-17	2.64802e-15
AT3G02800	274.527	2.24493	0.267077	8.40555	4.25866e-17	3.25888e-15
AT3G57280	1545.54	1.37745	0.163996	8.39928	4.49217e-17	3.4145e-15
AT3G20510	946.158	1.30649	0.155566	8.39829	4.5304e-17	3.43204e-15
AT1G01560	169.491	2.57088	0.306786	8.38005	5.29048e-17	3.99449e-15
AT5G61560	1291.22	1.83939	0.219543	8.37829	5.37027e-17	4.04126e-15
AT3G09940	1404.29	1.75355	0.209595	8.36637	5.94221e-17	4.45686e-15
AT2G43000	80.0442	2.80157	0.335135	8.35953	6.29674e-17	4.70718e-15
AT5G25910	184.446	1.97495	0.236666	8.34488	7.12895e-17	5.31177e-15
AT1G15625	127.041	2.55296	0.305966	8.34392	7.18659e-17	5.33716e-15
AT1G01480	130.237	2.45792	0.295649	8.31364	9.28139e-17	6.87035e-15
AT1G66465	61.5167	2.78501	0.335345	8.30491	9.98975e-17	7.37061e-15
AT3G23230	162.325	2.4891	0.300114	8.29384	1.09649e-16	8.0638e-15
AT2G29100	47.3447	2.86368	0.345928	8.27826	1.24987e-16	9.16205e-15
AT1G61140	4349.4	1.59116	0.192226	8.27754	1.25746e-16	9.18798e-15
AT1G07620	272.905	1.82686	0.220722	8.27678	1.26556e-16	9.2174e-15
AT1G80820	397.826	1.90754	0.230551	8.27383	1.29728e-16	9.41819e-15
AT1G15415	186.966	2.20004	0.266402	8.25835	1.47695e-16	1.06883e-14
AT3G50480	4332.85	1.96039	0.23775	8.24561	1.64317e-16	1.18533e-14
AT5G67450	236.325	2.11151	0.25682	8.22177	2.00525e-16	1.44194e-14
AT5G19890	321.864	2.15673	0.262481	8.21671	2.09155e-16	1.49923e-14
AT1G74080	98.1368	2.5573	0.312463	8.18434	2.73804e-16	1.95644e-14
AT1G16030	1033.37	1.9303	0.236078	8.17654	2.921e-16	2.08062e-14
AT1G74590	178.744	2.10643	0.257873	8.16849	3.12263e-16	2.21726e-14
AT1G59950	58.9961	2.73688	0.335725	8.15216	3.57471e-16	2.53034e-14
AT5G64660	467.665	1.57503	0.193804	8.12693	4.40284e-16	3.10681e-14
AT1G76070	765.537	1.83277	0.225629	8.12291	4.55141e-16	3.20168e-14
AT4G20460	316.134	1.47261	0.181465	8.11512	4.853e-16	3.40326e-14
AT3G27950	164.346	1.8175	0.22459	8.09253	5.84398e-16	4.08555e-14
AT2G24180	2179.17	1.10697	0.136901	8.08587	6.17202e-16	4.30162e-14
AT3G13790	4171.24	1.49088	0.184951	8.06097	7.56924e-16	5.25923e-14
AT3G07390	1977.28	1.67525	0.20784	8.06027	7.61275e-16	5.27328e-14
AT5G26340	7641.57	2.03052	0.252387	8.04527	8.60555e-16	5.94281e-14
AT3G19260	696.974	1.65911	0.206383	8.03899	9.05833e-16	6.23648e-14
AT4G11521	166.521	1.94419	0.242065	8.03166	9.61662e-16	6.60079e-14
AT3G29034	624.622	1.64687	0.205672	8.00723	1.17322e-15	8.02859e-14
AT3G09350	2061.55	1.82982	0.22866	8.00238	1.22042e-15	8.32642e-14
AT3G28580	158.621	2.02631	0.25436	7.9663	1.63496e-15	1.11211e-13
AT1G14640	620.388	1.81708	0.228324	7.95837	1.74314e-15	1.18215e-13
AT1G71697	1777.76	1.52182	0.191284	7.95584	1.77918e-15	1.20299e-13
AT3G54040	1733.4	1.31433	0.165304	7.95101	1.84998e-15	1.24714e-13
AT3G59660	2072.26	1.21034	0.152365	7.94366	1.96294e-15	1.31937e-13
AT2G22880	773.522	2.13549	0.270137	7.90521	2.67493e-15	1.7926e-13
AT4G36990	2258.49	1.47447	0.186534	7.90457	2.68854e-15	1.79641e-13
AT5G50200	1325.89	1.66747	0.211067	7.90019	2.78483e-15	1.85527e-13
AT1G47890	93.0556	2.63954	0.334219	7.89764	2.84224e-15	1.88797e-13
AT1G49030	191.081	1.73719	0.220052	7.89446	2.91576e-15	1.93114e-13
AT3G05660	363.152	1.75723	0.222946	7.88188	3.22497e-15	2.1297e-13
AT5G27420	1119.76	1.74388	0.221437	7.8753	3.39915e-15	2.23821e-13
AT2G24570	832.367	1.20356	0.153032	7.86474	3.69865e-15	2.42835e-13
AT1G66600	83.2545	2.264	0.288259	7.85404	4.02849e-15	2.63726e-13
AT1G56140	2245.97	1.49314	0.190668	7.83108	4.83715e-15	3.15753e-13
AT3G51450	714.148	2.08206	0.266371	7.81638	5.43629e-15	3.53843e-13
AT5G27760	3221.88	1.55435	0.199393	7.79538	6.42139e-15	4.16765e-13
AT3G57630	585.105	1.41168	0.181272	7.78767	6.82551e-15	4.41727e-13
AT2G25735	652.364	1.47719	0.189735	7.78552	6.94251e-15	4.48019e-13
AT2G23770	577.015	1.47856	0.189942	7.78425	7.01254e-15	4.51253e-13
AT2G47650	2198.2	1.18636	0.152485	7.78016	7.24336e-15	4.64786e-13
AT3G26210	953.569	1.61924	0.208204	7.77716	7.41712e-15	4.74591e-13
AT3G14225	45.7088	2.61451	0.336234	7.77588	7.49234e-15	4.78053e-13
AT4G12120	460.983	1.56506	0.20134	7.77323	7.65126e-15	4.86822e-13
AT5G39000	82.7587	2.39167	0.308034	7.76429	8.21048e-15	5.1976e-13
AT4G25030	4505.53	1.26293	0.16266	7.76422	8.21482e-15	5.1976e-13
AT1G30620	614.246	1.40568	0.181276	7.75436	8.87912e-15	5.60225e-13
AT4G37780	57.3795	2.42213	0.312381	7.75378	8.91976e-15	5.61226e-13
AT5G41750	708.737	1.74152	0.224704	7.75028	9.16896e-15	5.75308e-13
AT5G24090	171.421	1.76688	0.22808	7.74675	9.42726e-15	5.8828e-13
AT1G32940	718.248	1.85189	0.239054	7.74675	9.42765e-15	5.8828e-13
AT4G26120	218.809	1.71361	0.221499	7.73642	1.02253e-14	6.36299e-13
AT4G22030	35.2059	2.71445	0.351627	7.71969	1.16612e-14	7.23664e-13
AT1G17180	403.365	1.90672	0.247091	7.71667	1.19404e-14	7.38967e-13
AT1G64170	511.889	1.78669	0.231899	7.70463	1.31223e-14	8.099e-13
AT2G17720	2155.32	1.1339	0.147178	7.70423	1.31631e-14	8.10211e-13
AT2G16900	963.18	1.26634	0.164447	7.70059	1.35441e-14	8.314e-13
AT5G25450	147.093	2.08962	0.273303	7.6458	2.07656e-14	1.27125e-12
AT5G16170	227.812	1.68596	0.22116	7.62328	2.47315e-14	1.5059e-12
AT5G12340	249.127	1.73465	0.227618	7.62088	2.51952e-14	1.53001e-12
AT5G58940	278.351	1.55061	0.203844	7.60688	2.80799e-14	1.70064e-12
AT5G02780	168.428	2.45263	0.32289	7.59587	3.05731e-14	1.8467e-12
AT5G28646	58.2921	2.49273	0.328296	7.59292	3.12773e-14	1.88421e-12
AT4G36500	1515.22	1.26309	0.166699	7.57704	3.53521e-14	2.11842e-12
AT5G51440	763.837	2.07086	0.273415	7.57404	3.61801e-14	2.16231e-12
AT5G06740	219.692	1.59676	0.210832	7.57361	3.62993e-14	2.16372e-12
AT5G11970	1356.96	1.53641	0.203491	7.55024	4.34463e-14	2.58295e-12
AT1G67920	155.31	2.11054	0.281184	7.5059	6.10079e-14	3.61751e-12
AT5G44070	2757.28	1.59668	0.212896	7.49982	6.39058e-14	3.77945e-12
AT5G51465	41.3123	2.633	0.351374	7.49345	6.70868e-14	3.93871e-12
AT3G55470	1055.92	1.50585	0.200958	7.49338	6.71203e-14	3.93871e-12
AT2G17705	555.566	1.38392	0.184675	7.4938	6.69072e-14	3.93871e-12
AT1G61800	252.566	2.23264	0.29798	7.49257	6.7538e-14	3.95298e-12
AT2G15490	2750	1.97103	0.263416	7.48256	7.28869e-14	4.25505e-12
AT4G11850	2740.86	1.5272	0.204455	7.46964	8.04163e-14	4.67739e-12
AT5G20480	605.082	1.37257	0.183758	7.46944	8.05343e-14	4.67739e-12
AT5G52450	905.7	1.19215	0.159771	7.46161	8.54733e-14	4.95155e-12
AT1G56060	73.7999	2.46459	0.330393	7.45958	8.6798e-14	5.01546e-12
AT4G24920	3143.68	1.20151	0.161139	7.45636	8.89464e-14	5.12653e-12
AT2G34930	437.106	1.6421	0.220548	7.44558	9.65223e-14	5.54905e-12
AT1G51270	1085.55	1.16777	0.15692	7.44178	9.93351e-14	5.6963e-12
AT1G71490	162.866	1.95326	0.262496	7.44108	9.98621e-14	5.71206e-12
AT4G39230	362.619	1.48103	0.199371	7.42852	1.09822e-13	6.26597e-12
AT4G02330	357.725	1.43351	0.19319	7.42022	1.16929e-13	6.65466e-12
AT1G75270	2564.31	1.2464	0.168104	7.41446	1.22119e-13	6.93262e-12
AT5G67350	485.166	1.7286	0.233243	7.41117	1.25191e-13	7.08924e-12
AT2G31345	36.5179	2.62661	0.354835	7.40234	1.33807e-13	7.55827e-12
AT5G28630	376.989	1.4723	0.199153	7.39279	1.43779e-13	8.10132e-12
AT4G25070	404.252	1.43216	0.193904	7.38594	1.51379e-13	8.50842e-12
AT3G23550	4555.26	1.63952	0.222204	7.37844	1.60152e-13	8.97923e-12
AT1G59865	35.0738	2.59659	0.352964	7.35654	1.88742e-13	1.0556e-11
AT1G61430	674.442	1.22727	0.167486	7.32761	2.34299e-13	1.30717e-11
AT2G29470	60.2683	2.53093	0.345812	7.31879	2.50211e-13	1.39252e-11
AT3G50900	288.819	1.80489	0.246661	7.31728	2.53051e-13	1.40487e-11
AT2G15780	138.852	2.40232	0.328898	7.30415	2.7903e-13	1.54154e-11
AT1G14170	510.315	1.38729	0.190008	7.30121	2.85198e-13	1.57178e-11
AT1G55450	4971.7	1.55614	0.213516	7.28815	3.14232e-13	1.72759e-11
AT1G35230	57.9621	2.40902	0.330731	7.28392	3.24251e-13	1.77835e-11
AT2G32240	13593	1.67597	0.230192	7.28076	3.31942e-13	1.81614e-11
AT4G14400	1546.01	1.27374	0.175175	7.27124	3.5621e-13	1.94422e-11
AT1G06983	72.3106	2.30399	0.317016	7.26774	3.65559e-13	1.98568e-11
AT5G05300	62.118	2.23882	0.308084	7.26691	3.67805e-13	1.9931e-11
AT2G28570	647.162	1.35468	0.186525	7.26272	3.79388e-13	2.05096e-11
AT5G10520	455.601	1.32892	0.182986	7.26239	3.80308e-13	2.05104e-11
AT1G76470	36.7192	2.4546	0.338144	7.25903	3.89882e-13	2.09768e-11
AT5G36907	79.7624	2.44395	0.336923	7.25375	4.054e-13	2.176e-11
AT3G51340	216.314	1.70121	0.234739	7.24722	4.25413e-13	2.27802e-11
AT4G01720	523.169	1.32232	0.182564	7.24306	4.38663e-13	2.34343e-11
AT2G37940	2477.73	1.36486	0.188459	7.24219	4.41486e-13	2.35296e-11
AT1G18210	2208.81	1.22121	0.168901	7.23031	4.8189e-13	2.56227e-11
AT1G79710	1230.98	1.40103	0.193927	7.22453	5.02853e-13	2.66748e-11
AT4G28460	55.2241	2.39107	0.33111	7.22137	5.14651e-13	2.72368e-11
AT4G04700	581.467	1.48713	0.206141	7.21415	5.42735e-13	2.86562e-11
AT5G25920	54.5506	2.51836	0.349384	7.208	5.67819e-13	2.99109e-11
AT1G08940	873.701	1.66326	0.230772	7.2074	5.70284e-13	2.9971e-11
AT3G48890	1908.24	1.00522	0.139524	7.20464	5.81978e-13	3.05148e-11
AT5G10410	140.838	1.62597	0.225832	7.19993	6.02454e-13	3.15154e-11
AT3G46110	203.079	1.6315	0.226887	7.19079	6.44171e-13	3.36201e-11
AT2G29460	1614.76	2.40544	0.334987	7.18072	6.93442e-13	3.61084e-11
AT1G73810	63.9688	2.15291	0.300541	7.16344	7.86757e-13	4.08735e-11
AT1G03230	2138.37	1.33251	0.18604	7.16252	7.92098e-13	4.10568e-11
AT5G24230	367.357	1.48619	0.207684	7.15599	8.30686e-13	4.29586e-11
AT3G48850	232.943	2.56587	0.359116	7.14497	9.00151e-13	4.64449e-11
AT1G17860	2498.91	1.2924	0.181385	7.12514	1.03972e-12	5.35244e-11
AT5G44480	450.949	1.3701	0.192366	7.12236	1.06097e-12	5.44945e-11
AT4G19880	7297.03	1.33536	0.187725	7.1134	1.1322e-12	5.80213e-11
AT1G03220	9257.76	1.40701	0.198012	7.10566	1.19746e-12	6.12275e-11
AT5G05730	4138.82	1.60897	0.227099	7.08489	1.39157e-12	7.09917e-11
AT4G21903	116.288	1.77278	0.250456	7.07818	1.46057e-12	7.43448e-11
AT3G13910	613.506	1.37177	0.19422	7.06297	1.62979e-12	8.27721e-11
AT1G36640	75.6513	2.05576	0.291277	7.05775	1.69217e-12	8.57479e-11
AT4G01250	1060.76	1.37028	0.194234	7.0548	1.72855e-12	8.73961e-11
AT1G24140	126.079	1.95852	0.278056	7.04362	1.87312e-12	9.44945e-11
AT5G13080	319.253	1.93388	0.274666	7.04083	1.91092e-12	9.61873e-11
AT5G60950	361.713	1.29374	0.184104	7.02725	2.10637e-12	1.0579e-10
AT4G11370	79.8093	2.20709	0.314397	7.02009	2.21724e-12	1.11112e-10
AT4G24350	2934.84	1.03742	0.147825	7.01791	2.25214e-12	1.12612e-10
AT4G05390	1874.27	1.42254	0.202758	7.01599	2.28323e-12	1.13915e-10
AT3G53150	180.373	1.70652	0.244097	6.99113	2.72675e-12	1.35744e-10
AT3G21700	366.171	1.35369	0.193831	6.98384	2.87209e-12	1.42666e-10
AT1G25390	1180.87	1.27303	0.182307	6.98288	2.89194e-12	1.43338e-10
AT1G59870	43405.6	1.53481	0.219807	6.98255	2.89866e-12	1.43357e-10
AT2G17120	762.353	1.36472	0.195838	6.96862	3.20073e-12	1.57951e-10
AT3G51330	956.721	1.29573	0.186077	6.96339	3.3217e-12	1.63565e-10
AT2G31230	571.388	1.20914	0.17375	6.95907	3.4253e-12	1.683e-10
AT1G12210	345.731	1.34189	0.192896	6.95658	3.48642e-12	1.70933e-10
AT1G64940	164.896	1.98013	0.284842	6.95168	3.60972e-12	1.76595e-10
AT1G65390	931.595	1.46886	0.211515	6.9445	3.79791e-12	1.85402e-10
AT2G38290	2017.48	1.44114	0.207736	6.93735	3.99532e-12	1.94619e-10
AT1G07630	1262.59	1.31726	0.189896	6.93674	4.01239e-12	1.95031e-10
AT5G44585	745.07	1.59723	0.230622	6.92576	4.33652e-12	2.10335e-10
AT1G34750	569.379	1.16835	0.168786	6.92211	4.44971e-12	2.15364e-10
AT1G76970	579.347	1.39498	0.202161	6.90035	5.18733e-12	2.49996e-10
AT4G28085	238.205	1.52932	0.221936	6.89081	5.54746e-12	2.66785e-10
AT2G15760	134.012	1.79316	0.260417	6.88574	5.7489e-12	2.75887e-10
AT5G51060	917.121	1.84762	0.268393	6.884	5.81941e-12	2.7868e-10
AT3G50260	358.783	1.49707	0.21788	6.87107	6.37232e-12	3.04513e-10
AT4G04490	71.8326	2.11703	0.308344	6.86579	6.61244e-12	3.15323e-10
AT2G31020	601.994	1.56321	0.228022	6.85553	7.10473e-12	3.38087e-10
AT1G58420	54.0496	2.27125	0.331352	6.8545	7.15627e-12	3.39826e-10
AT1G05575	415.047	1.46478	0.214145	6.84012	7.91295e-12	3.74971e-10
AT4G39890	267.755	1.44669	0.211513	6.8397	7.93608e-12	3.75282e-10
AT4G22690	4546.07	0.941822	0.13783	6.83323	8.30258e-12	3.91795e-10
AT1G74650	129.261	1.81454	0.265835	6.82583	8.74182e-12	4.11665e-10
AT2G41380	1188.86	1.52583	0.224002	6.81166	9.64787e-12	4.5339e-10
AT5G45070	364.444	1.35492	0.199118	6.80458	1.01343e-11	4.75263e-10
AT5G20050	2147.06	1.33658	0.196453	6.80357	1.02059e-11	4.77631e-10
AT2G20562	185.146	1.54498	0.227762	6.78332	1.17441e-11	5.48487e-10
AT3G52400	2371.2	1.19885	0.176777	6.78174	1.18741e-11	5.53418e-10
AT3G56710	684.514	1.78467	0.263815	6.76486	1.33441e-11	6.20651e-10
AT3G19660	379.75	1.47574	0.218308	6.75986	1.38122e-11	6.41108e-10
AT4G30060	721.879	0.960684	0.142246	6.75366	1.44159e-11	6.67761e-10
AT1G24150	591.706	1.16832	0.173505	6.73366	1.65445e-11	7.64795e-10
AT3G47090	121.527	1.81385	0.269631	6.72714	1.73028e-11	7.98219e-10
AT3G48630	35.7947	2.4022	0.357448	6.72042	1.81206e-11	8.32672e-10
AT2G43120	459.933	1.44146	0.21449	6.7204	1.81232e-11	8.32672e-10
AT5G18480	2210.23	1.12573	0.167635	6.71537	1.87583e-11	8.60111e-10
AT2G37710	2088.07	1.22726	0.182782	6.71433	1.88937e-11	8.6457e-10
AT2G39400	3857.45	1.44162	0.215069	6.70303	2.04139e-11	9.32249e-10
AT3G01720	1332.12	0.976566	0.145701	6.70253	2.04843e-11	9.3358e-10
AT1G76980	328.808	1.29295	0.193268	6.68993	2.23272e-11	1.01553e-09
AT5G05340	74.9909	2.1675	0.324251	6.68465	2.3148e-11	1.05075e-09
AT3G04720	2111.1	1.15417	0.172775	6.68022	2.38581e-11	1.08082e-09
AT4G23260	1314.94	0.995949	0.149104	6.67954	2.39689e-11	1.08367e-09
AT5G05410	817.329	1.70734	0.255676	6.67775	2.42638e-11	1.09482e-09
AT1G01340	667.349	1.14564	0.171752	6.6703	2.55277e-11	1.14956e-09
AT2G30550	856.863	1.24137	0.186177	6.66768	2.59885e-11	1.16799e-09
AT2G46140	517.235	1.14726	0.1722	6.66235	2.69478e-11	1.2087e-09
AT1G15125	3623.35	1.37316	0.206251	6.6577	2.7815e-11	1.24513e-09
AT5G66790	303.962	1.46331	0.220033	6.65044	2.92222e-11	1.30554e-09
AT2G29990	434.556	1.30313	0.196473	6.63265	3.29722e-11	1.47018e-09
AT5G47850	47.4599	2.29511	0.346324	6.62705	3.42452e-11	1.52394e-09
AT3G14200	500.774	1.27044	0.191912	6.6199	3.59439e-11	1.5964e-09
AT1G12200	1031.43	1.20118	0.181487	6.61854	3.62775e-11	1.60807e-09
AT5G42010	371.051	1.39001	0.210094	6.61614	3.68694e-11	1.63111e-09
AT1G04370	29.7467	2.31886	0.351002	6.60641	3.9376e-11	1.73861e-09
AT1G30370	159.36	1.89987	0.287753	6.60243	4.04474e-11	1.78244e-09
AT4G19460	226.296	1.64226	0.248826	6.60005	4.1102e-11	1.80777e-09
AT5G22250	391.744	1.41798	0.214871	6.59923	4.13302e-11	1.81428e-09
AT1G07400	771.486	2.23875	0.339461	6.595	4.25244e-11	1.86121e-09
AT1G10990	244.611	1.33739	0.202793	6.59487	4.25635e-11	1.86121e-09
AT3G43250	34.2642	2.31334	0.351153	6.58784	4.46287e-11	1.94775e-09
AT1G76930	9753.63	1.21851	0.185554	6.56686	5.13859e-11	2.23835e-09
AT4G36640	586.992	1.17572	0.179123	6.56374	5.24756e-11	2.28143e-09
AT3G09830	920.894	1.36806	0.208512	6.56105	5.34318e-11	2.31855e-09
AT1G66725	362.278	1.32447	0.202021	6.55611	5.52294e-11	2.39197e-09
AT4G04220	135.01	1.62268	0.247535	6.55535	5.5511e-11	2.39958e-09
AT4G18253	107.886	1.8566	0.283291	6.55369	5.61336e-11	2.42187e-09
AT2G32210	144.629	1.64961	0.251754	6.55246	5.65985e-11	2.43729e-09
AT4G08780	289.906	1.5005	0.229279	6.54443	5.97238e-11	2.56213e-09
AT4G17615	784.383	1.58167	0.242117	6.53266	6.46122e-11	2.7666e-09
AT4G37390	344.136	1.28756	0.197399	6.52261	6.90962e-11	2.95302e-09
AT1G51860	516.525	1.31149	0.201307	6.51489	7.2741e-11	3.10293e-09
AT1G11100	215.314	1.60663	0.246697	6.51256	7.38788e-11	3.14554e-09
AT2G29110	38.8306	2.16992	0.333435	6.50778	7.62711e-11	3.23524e-09
AT1G70530	2311.97	1.22016	0.187769	6.49821	8.1279e-11	3.44122e-09
AT1G21250	596.816	1.1589	0.178581	6.48948	8.61325e-11	3.6399e-09
AT1G69520	265.23	1.28582	0.19829	6.48456	8.89884e-11	3.75359e-09
AT1G69730	1355.39	0.8632	0.133127	6.48404	8.92996e-11	3.75971e-09
AT1G09913	100.518	1.86196	0.287323	6.48038	9.14922e-11	3.84488e-09
AT1G19380	1502.12	1.35646	0.209379	6.4785	9.26366e-11	3.88576e-09
AT1G51913	31.8607	2.3112	0.356825	6.47712	9.34877e-11	3.91421e-09
AT1G16110	443.523	1.29335	0.199745	6.47502	9.48019e-11	3.96191e-09
AT2G43510	446.493	1.47592	0.22826	6.46598	1.00641e-10	4.1982e-09
AT5G27060	44.9796	2.27033	0.351453	6.45984	1.04815e-10	4.36425e-09
AT3G24500	608.78	1.57845	0.244542	6.45473	1.08414e-10	4.50584e-09
AT4G29050	234.074	1.35079	0.209358	6.45209	1.10322e-10	4.57673e-09
AT1G02400	625.395	1.59749	0.247629	6.45115	1.11004e-10	4.59664e-09
AT4G39980	3883.65	1.11063	0.172219	6.44894	1.12633e-10	4.65558e-09
AT2G28210	825.685	2.29858	0.356594	6.44591	1.14909e-10	4.74097e-09
AT5G46080	212.531	1.4919	0.231831	6.4353	1.23229e-10	5.07502e-09
AT5G28830	677.785	1.25035	0.194405	6.43168	1.26206e-10	5.18818e-09
AT3G04220	150.534	1.76735	0.274997	6.4268	1.30317e-10	5.34087e-09
AT2G23680	383.724	1.44864	0.22542	6.42639	1.30671e-10	5.34087e-09
AT1G66480	648.977	1.36913	0.213041	6.42661	1.30481e-10	5.34087e-09
AT3G28850	314.864	1.42302	0.221446	6.42605	1.30965e-10	5.34087e-09
AT4G02940	2625.64	1.26465	0.196805	6.42589	1.31099e-10	5.34087e-09
AT4G36430	817.674	1.29411	0.20148	6.42303	1.33588e-10	5.4325e-09
AT1G33612	62.2285	1.94191	0.302604	6.41733	1.38685e-10	5.6196e-09
AT5G22530	52.4538	2.13368	0.332705	6.41312	1.42568e-10	5.76661e-09
AT5G40760	1555.84	0.946121	0.147539	6.41268	1.42986e-10	5.77323e-09
AT5G43520	726.913	1.09114	0.170626	6.39493	1.60624e-10	6.47382e-09
AT5G57510	98.5928	2.03117	0.318066	6.38601	1.7027e-10	6.83827e-09
AT2G32680	61.8727	1.94305	0.304306	6.38521	1.71164e-10	6.86202e-09
AT5G51830	5222.53	1.54117	0.241392	6.3845	1.71959e-10	6.88171e-09
AT1G70420	344.632	1.27904	0.200442	6.3811	1.75816e-10	7.01127e-09
AT3G07090	1087.92	1.25158	0.196328	6.37492	1.83057e-10	7.28721e-09
AT5G53110	222.788	1.49399	0.234473	6.3717	1.86949e-10	7.4291e-09
AT4G31500	6423.87	1.43018	0.224707	6.36462	1.95777e-10	7.75271e-09
AT2G30490	8980.58	0.826782	0.129957	6.36199	1.99162e-10	7.87296e-09
AT1G11200	572.284	1.08819	0.171084	6.3606	2.00973e-10	7.93072e-09
AT1G03370	2164.61	1.21324	0.191008	6.35181	2.12797e-10	8.38274e-09
AT3G21230	423.214	1.38336	0.218291	6.3372	2.33982e-10	9.20125e-09
AT2G08340	72.7069	2.18133	0.344491	6.33205	2.41924e-10	9.49707e-09
AT4G15975	103.762	1.71814	0.27174	6.32276	2.56935e-10	1.00689e-08
AT5G60280	218.137	1.4619	0.231764	6.30769	2.83232e-10	1.10803e-08
AT1G47510	115.66	1.88115	0.298337	6.30546	2.87348e-10	1.12219e-08
AT1G14360	722.622	1.16257	0.184383	6.30518	2.87856e-10	1.12224e-08
AT1G78410	52.381	2.09064	0.331753	6.30179	2.94229e-10	1.14512e-08
AT5G57190	217.662	1.65743	0.26371	6.28505	3.27737e-10	1.27296e-08
AT4G23270	2574.45	1.11997	0.178201	6.28484	3.28201e-10	1.27296e-08
AT1G16090	210.92	1.36924	0.217991	6.2812	3.3597e-10	1.30086e-08
AT2G44490	7721.45	1.13621	0.180907	6.28062	3.37232e-10	1.30352e-08
AT2G19590	465.495	1.32509	0.211016	6.27956	3.39522e-10	1.31014e-08
AT2G46495	69.1465	1.75239	0.279235	6.27568	3.48108e-10	1.34099e-08
AT4G18880	840.381	1.23223	0.196571	6.26864	3.64217e-10	1.40066e-08
AT1G21100	1927.7	1.46773	0.234194	6.26715	3.67716e-10	1.41172e-08
AT2G28890	1759.45	1.10573	0.176543	6.26322	3.77112e-10	1.44534e-08
AT1G74100	2829.98	1.36643	0.218284	6.25988	3.85269e-10	1.47411e-08
AT4G34131	2261.24	1.34458	0.215117	6.25045	4.09284e-10	1.56335e-08
AT1G02230	75.0306	2.07859	0.332828	6.24525	4.23111e-10	1.61074e-08
AT5G61010	1435.19	1.04533	0.167526	6.23981	4.38095e-10	1.66219e-08
AT1G14370	692.643	1.27991	0.205173	6.2382	4.4264e-10	1.67663e-08
AT5G38940	1560.75	1.0427	0.167182	6.2369	4.4632e-10	1.68775e-08
AT2G36210	52.3745	2.03025	0.325845	6.23072	4.64306e-10	1.75283e-08
AT2G37040	8375.58	1.13599	0.182358	6.22943	4.68139e-10	1.76436e-08
AT5G15130	600.202	1.12246	0.180357	6.22357	4.85968e-10	1.82852e-08
AT1G05670	629.232	1.33588	0.214903	6.21618	5.09396e-10	1.91349e-08
AT4G10380	632.53	0.999974	0.160893	6.21513	5.12817e-10	1.92315e-08
AT3G60540	118.61	1.98586	0.31984	6.20892	5.33505e-10	1.99742e-08
AT1G26250	1974.46	0.844342	0.136059	6.20568	5.44597e-10	2.03223e-08
AT5G60900	57.0114	1.87107	0.301741	6.20092	5.61349e-10	2.0913e-08
AT5G04930	3424.01	1.04761	0.169127	6.19421	5.8579e-10	2.1752e-08
AT3G13610	799.066	1.46875	0.237392	6.18703	6.13079e-10	2.27281e-08
AT3G25250	220.869	1.47928	0.23915	6.18557	6.18783e-10	2.2902e-08
AT2G40095	328.107	1.32195	0.213731	6.18511	6.20594e-10	2.29316e-08
AT4G27970	153.344	1.31944	0.213824	6.17068	6.79986e-10	2.50445e-08
AT1G27720	157.976	1.64272	0.267389	6.14357	8.06891e-10	2.96222e-08
AT2G02220	2105.69	1.14418	0.18625	6.14324	8.08572e-10	2.96359e-08
AT5G44568	190.483	1.79937	0.293246	6.13605	8.45959e-10	3.09561e-08
AT4G30530	5430.33	1.30896	0.213501	6.13092	8.73711e-10	3.19201e-08
AT2G37980	233.859	1.34548	0.219512	6.1294	8.82123e-10	3.21755e-08
AT5G43420	253.439	1.28234	0.209501	6.12093	9.30303e-10	3.38783e-08
AT4G24310	205.623	1.27196	0.208021	6.11456	9.68238e-10	3.52031e-08
AT1G07128	325.643	1.46762	0.240099	6.11255	9.80541e-10	3.55364e-08
AT1G51920	23.7733	2.1899	0.358363	6.11083	9.91157e-10	3.58637e-08
AT1G76600	2337.86	1.40298	0.229624	6.10993	9.96772e-10	3.60094e-08
AT4G21990	9657.44	1.3445	0.220336	6.10203	1.0473e-09	3.77743e-08
AT2G40340	368.499	1.60516	0.263134	6.10016	1.05965e-09	3.81591e-08
AT1G67810	1302.41	1.64625	0.270147	6.09389	1.10198e-09	3.96205e-08
AT3G11820	1979.9	1.13118	0.18565	6.09307	1.10763e-09	3.96975e-08
AT4G30340	756.77	1.07895	0.177111	6.09192	1.11562e-09	3.9921e-08
AT1G05700	257.673	1.43431	0.23629	6.07013	1.27809e-09	4.55559e-08
AT3G49540	28.7561	2.16691	0.356986	6.07	1.27913e-09	4.55559e-08
AT4G38560	76.8377	1.78233	0.293722	6.06807	1.29454e-09	4.60323e-08
AT2G42360	170.996	1.80536	0.297568	6.06704	1.30291e-09	4.62575e-08
AT5G44390	234.268	1.28187	0.211309	6.06632	1.30875e-09	4.63921e-08
AT2G18660	29.0832	2.12461	0.350301	6.0651	1.31873e-09	4.66727e-08
AT2G27660	2941.86	1.98195	0.327019	6.06066	1.35566e-09	4.79051e-08
AT1G68620	455.275	1.48852	0.246117	6.04803	1.46631e-09	5.17343e-08
AT3G53160	137.498	1.89138	0.313217	6.03855	1.55506e-09	5.47803e-08
AT2G47130	526.181	1.37664	0.228123	6.03462	1.59334e-09	5.60415e-08
AT5G59540	3876.43	1.05241	0.174553	6.02914	1.6483e-09	5.78846e-08
AT4G11070	31.6645	2.14219	0.355788	6.02098	1.73365e-09	6.07877e-08
AT1G70520	1153.77	1.10912	0.184627	6.00733	1.88605e-09	6.59274e-08
AT1G06840	1300.53	0.87155	0.145298	5.99836	1.99325e-09	6.95671e-08
AT5G42020	7693.22	1.22803	0.204827	5.99547	2.02893e-09	7.07035e-08
AT1G72280	152.343	1.39015	0.231933	5.99374	2.0507e-09	7.13522e-08
AT3G18830	2517.09	1.14249	0.191056	5.97986	2.23335e-09	7.75884e-08
AT1G57650	23.7002	2.14193	0.358241	5.97902	2.2449e-09	7.78701e-08
AT3G12040	149.173	1.39239	0.233309	5.96801	2.40164e-09	8.31798e-08
AT1G17147	225.574	1.35465	0.227104	5.96488	2.4481e-09	8.46594e-08
AT4G13920	93.5825	1.58881	0.266401	5.96397	2.46182e-09	8.50039e-08
AT2G39660	1499	1.09427	0.183756	5.95502	2.60039e-09	8.95159e-08
AT1G61380	2456.79	1.2833	0.215706	5.9493	2.69298e-09	9.25624e-08
AT4G39030	298.326	1.5098	0.253866	5.94721	2.72748e-09	9.36063e-08
AT2G41110	2117.16	0.97235	0.163516	5.94652	2.73902e-09	9.38601e-08
AT5G45090	81.543	1.78436	0.300111	5.94568	2.75309e-09	9.41999e-08
AT1G79410	1885.81	1.10814	0.186609	5.93828	2.88033e-09	9.84049e-08
AT4G08935	30.8763	2.01782	0.340381	5.92813	3.06405e-09	1.04524e-07
AT3G09020	304.465	1.14509	0.193231	5.92602	3.10372e-09	1.05718e-07
AT1G53390	1635.43	0.834942	0.141001	5.92153	3.1896e-09	1.0848e-07
AT3G22800	431.998	1.29001	0.217867	5.92108	3.19825e-09	1.08611e-07
AT5G14730	1192.11	1.14419	0.193625	5.90933	3.43511e-09	1.1648e-07
AT4G13510	3676.52	0.922748	0.15639	5.90029	3.62853e-09	1.22855e-07
AT3G04110	627.245	1.05744	0.179283	5.89816	3.67579e-09	1.24269e-07
AT3G12910	24.6099	2.11359	0.358397	5.89733	3.69431e-09	1.24709e-07
AT2G41105	42.4362	2.08933	0.354962	5.88607	3.95489e-09	1.33307e-07
AT2G47190	53.3598	1.8091	0.307819	5.87717	4.17342e-09	1.40464e-07
AT1G60730	3100.79	1.38933	0.236533	5.87374	4.26084e-09	1.43193e-07
AT3G57550	2624.19	0.904843	0.154065	5.87311	4.27702e-09	1.43524e-07
AT2G19450	805.303	1.43077	0.243807	5.86845	4.39881e-09	1.47393e-07
AT4G10960	176.423	1.42264	0.24269	5.86193	4.57506e-09	1.53072e-07
AT5G12480	2931.43	1.00826	0.17216	5.85651	4.72706e-09	1.57924e-07
AT1G25370	341.048	1.39407	0.238415	5.84724	4.9979e-09	1.66727e-07
AT4G30190	13229.4	0.884467	0.151337	5.84434	5.08587e-09	1.69412e-07
AT4G02520	16306.3	1.31732	0.225669	5.83739	5.30241e-09	1.76107e-07
AT4G25720	869.9	0.920657	0.157713	5.83754	5.29777e-09	1.76107e-07
AT2G20320	1121.19	1.19594	0.204899	5.83671	5.3241e-09	1.76568e-07
AT1G03740	2754.38	1.05796	0.181404	5.83206	5.47479e-09	1.813e-07
AT1G07240	1101.33	1.10976	0.190529	5.82461	5.7245e-09	1.89293e-07
AT3G57450	1382.02	1.04369	0.179232	5.8231	5.7767e-09	1.90741e-07
AT4G12500	155.551	1.67491	0.287668	5.82235	5.80244e-09	1.91312e-07
AT3G29400	1072.95	1.04391	0.179399	5.81897	5.92121e-09	1.94944e-07
AT3G50910	1343.09	1.14918	0.19755	5.81717	5.98527e-09	1.96482e-07
AT5G60270	985.214	1.10513	0.189971	5.81734	5.97924e-09	1.96482e-07
AT1G02900	685.301	0.843514	0.145108	5.81299	6.13665e-09	2.0116e-07
AT4G18950	4840.52	1.35836	0.233823	5.80936	6.27141e-09	2.0528e-07
AT3G21351	271.871	1.51408	0.260706	5.80761	6.33716e-09	2.07133e-07
AT4G39640	1494.74	1.14927	0.198066	5.80244	6.53587e-09	2.13023e-07
AT1G54890	428.501	1.03499	0.178371	5.80243	6.53617e-09	2.13023e-07
AT4G26010	611.525	0.921856	0.158976	5.79873	6.6821e-09	2.17466e-07
AT1G75830	37.0855	2.06788	0.357388	5.78609	7.20422e-09	2.33786e-07
AT1G69750	653.157	1.16298	0.201048	5.78461	7.26792e-09	2.3518e-07
AT1G61400	190.449	1.28324	0.221871	5.78372	7.30655e-09	2.36092e-07
AT5G45280	1005.48	0.921032	0.159276	5.78261	7.35516e-09	2.36987e-07
AT1G22180	315.389	1.02858	0.177868	5.78281	7.34635e-09	2.36987e-07
AT1G65486	221.157	1.46078	0.252691	5.78087	7.43149e-09	2.38767e-07
AT4G35940	523.203	1.14021	0.197376	5.77684	7.61153e-09	2.44205e-07
AT4G15300	152.515	1.26132	0.218354	5.77652	7.62633e-09	2.44334e-07
AT5G40990	26.1795	2.05618	0.356065	5.77474	7.70737e-09	2.46581e-07
AT5G55930	1257.55	0.913513	0.158203	5.7743	7.72732e-09	2.46871e-07
AT5G37740	1190.84	0.942786	0.163723	5.75842	8.4905e-09	2.70871e-07
AT2G20960	2637	1.03242	0.179314	5.75763	8.53045e-09	2.71763e-07
AT1G53980	24.6569	2.0334	0.353784	5.74758	9.05281e-09	2.87595e-07
AT1G66090	464.134	1.52411	0.265298	5.74489	9.19807e-09	2.91392e-07
AT5G17000	3596.02	1.28904	0.224376	5.74501	9.19156e-09	2.91392e-07
AT1G53990	143.29	1.47033	0.256264	5.73757	9.60457e-09	3.03845e-07
AT1G67520	201.496	1.30707	0.228206	5.72757	1.0188e-08	3.21853e-07
AT4G01010	388.738	1.20702	0.2108	5.72588	1.02901e-08	3.24624e-07
AT1G71520	337.167	2.03275	0.355304	5.72117	1.0579e-08	3.33276e-07
AT1G27130	2768.52	0.953708	0.166779	5.71841	1.07527e-08	3.38277e-07
AT1G13210	2731.06	1.26553	0.221435	5.71514	1.09614e-08	3.44366e-07
AT4G00330	1403.13	0.845413	0.148037	5.71084	1.12422e-08	3.52696e-07
AT4G14370	404.155	1.49613	0.26235	5.70278	1.17868e-08	3.6927e-07
AT2G26560	6567.44	1.84403	0.323408	5.70186	1.18508e-08	3.70763e-07
AT3G11402	126.759	1.31701	0.230989	5.70161	1.18682e-08	3.70796e-07
AT1G15520	3767.45	2.04707	0.359296	5.69745	1.21614e-08	3.79432e-07
AT5G01830	560.702	1.35247	0.237498	5.69465	1.23629e-08	3.8466e-07
AT5G15730	780.173	0.831806	0.146068	5.69465	1.23626e-08	3.8466e-07
AT1G74010	133.979	1.31461	0.231181	5.68648	1.29682e-08	4.02941e-07
AT5G48380	2108.19	0.989561	0.174068	5.6849	1.30887e-08	4.06127e-07
AT3G11080	95.9698	1.6592	0.291889	5.68436	1.31302e-08	4.06857e-07
AT4G28390	559.547	1.07097	0.188461	5.68271	1.32573e-08	4.10233e-07
AT5G41680	53.0973	1.83091	0.322679	5.67408	1.39435e-08	4.30878e-07
AT4G06746	921.293	1.47942	0.260916	5.67009	1.42726e-08	4.40449e-07
AT5G19230	2667.26	1.23174	0.217308	5.66817	1.4433e-08	4.44791e-07
AT5G61160	1241.65	2.01227	0.355132	5.66626	1.45946e-08	4.49161e-07
AT1G79450	175.86	1.29113	0.228154	5.65901	1.52245e-08	4.67276e-07
AT3G13100	337.973	1.2015	0.212353	5.65801	1.53138e-08	4.69381e-07
AT2G40740	22.4886	2.02916	0.359258	5.64819	1.62145e-08	4.96318e-07
AT1G74330	805.587	1.16244	0.206119	5.63966	1.7039e-08	5.20852e-07
AT1G22280	1804.57	1.00113	0.177738	5.63262	1.77497e-08	5.41843e-07
AT5G07390	185.857	1.2435	0.220891	5.62944	1.80791e-08	5.51157e-07
AT2G23270	34.9916	1.98649	0.353298	5.62271	1.87984e-08	5.72315e-07
AT1G17745	1615.63	1.25799	0.224	5.61602	1.95402e-08	5.94101e-07
AT2G46620	465.444	0.993311	0.177011	5.61159	2.0048e-08	6.08722e-07
AT1G68690	560.426	1.1478	0.204677	5.60789	2.0481e-08	6.21037e-07
AT5G62070	786.218	0.936134	0.167052	5.60384	2.09661e-08	6.34896e-07
AT5G48175	83.5963	1.53908	0.274668	5.60342	2.10167e-08	6.3558e-07
AT4G38550	6349.56	1.16419	0.207788	5.60277	2.10955e-08	6.37113e-07
AT3G16330	150.193	1.43933	0.256926	5.60211	2.11758e-08	6.38687e-07
AT3G53180	4210.51	1.17251	0.209443	5.59824	2.16541e-08	6.51378e-07
AT4G15120	68.052	1.64741	0.294362	5.59653	2.18687e-08	6.5696e-07
AT1G21550	91.9891	1.5027	0.268552	5.59557	2.19893e-08	6.59709e-07
AT3G49120	3039.24	0.989246	0.176833	5.59424	2.21586e-08	6.63908e-07
AT4G36030	435.655	1.0234	0.183097	5.58939	2.27869e-08	6.81831e-07
AT2G44578	36.5883	1.94485	0.347998	5.5887	2.28778e-08	6.83649e-07
AT3G51350	177.036	1.16865	0.209147	5.58772	2.30074e-08	6.86614e-07
AT5G01732	34.4933	1.95015	0.349277	5.58338	2.35882e-08	7.03021e-07
AT5G54710	1939.87	1.23113	0.220739	5.5773	2.44275e-08	7.2708e-07
AT4G11000	66.8183	1.61055	0.289017	5.5725	2.51112e-08	7.46448e-07
AT1G15430	670.134	1.26685	0.227491	5.56878	2.56535e-08	7.61569e-07
AT4G18170	344.079	1.27972	0.230307	5.5566	2.75087e-08	8.15575e-07
AT4G39580	151.547	1.32371	0.238269	5.55552	2.7678e-08	8.19521e-07
AT1G10040	128.638	1.32849	0.239201	5.55387	2.79418e-08	8.26253e-07
AT4G19810	327.561	1.0395	0.187184	5.55333	2.8027e-08	8.27691e-07
AT1G09080	357.281	2.00314	0.360808	5.55182	2.82711e-08	8.33814e-07
AT5G47120	2189.31	0.765269	0.137859	5.55111	2.83858e-08	8.36108e-07
AT2G26020	79.1926	1.60183	0.288701	5.54842	2.88258e-08	8.47965e-07
AT4G38540	3190.78	1.3553	0.244333	5.54695	2.90699e-08	8.54037e-07
AT5G14700	237.911	1.21757	0.219632	5.54366	2.9622e-08	8.69129e-07
AT5G28610	107.041	1.53337	0.276987	5.5359	3.09633e-08	9.07308e-07
AT4G37670	579.681	1.0258	0.18534	5.53466	3.11839e-08	9.12593e-07
AT2G30400	166.403	1.46979	0.265619	5.53343	3.14025e-08	9.17647e-07
AT1G29670	2881.59	0.978566	0.176852	5.53324	3.14376e-08	9.17647e-07
AT3G10500	1456.95	1.02313	0.185159	5.52567	3.28233e-08	9.56861e-07
AT3G11340	892.218	1.32108	0.239108	5.52503	3.29423e-08	9.59096e-07
AT1G53430	3622.4	1.03633	0.188002	5.5123	3.5417e-08	1.02982e-06
AT1G69960	1416.03	0.839549	0.152433	5.50768	3.63601e-08	1.05589e-06
AT1G13540	77.1043	1.50561	0.273403	5.50692	3.65168e-08	1.05908e-06
AT1G14040	617.448	1.07697	0.195757	5.50157	3.76424e-08	1.09033e-06
AT2G45220	1568.7	1.45949	0.265453	5.4981	3.83914e-08	1.11061e-06
AT5G03700	1078.16	1.25144	0.227688	5.4963	3.87843e-08	1.12054e-06
AT4G20860	8209.85	1.37396	0.250026	5.49528	3.90102e-08	1.12563e-06
AT4G37640	2557.07	1.12733	0.205762	5.47883	4.28156e-08	1.23386e-06
AT1G07350	1000.29	0.908353	0.165844	5.47716	4.32203e-08	1.24394e-06
AT5G61890	156.372	1.97647	0.360918	5.47623	4.34485e-08	1.24734e-06
AT1G27330	1268.07	1.00637	0.183763	5.47645	4.33947e-08	1.24734e-06
AT5G66020	17.5644	1.96039	0.358766	5.46428	4.64799e-08	1.33268e-06
AT4G04960	1010.87	1.09297	0.200099	5.46218	4.70333e-08	1.34684e-06
AT4G21400	1406.93	0.905695	0.165871	5.46025	4.75463e-08	1.35981e-06
AT2G36780	1416.03	1.89653	0.347639	5.45548	4.88421e-08	1.39335e-06
AT3G51890	680.907	1.12966	0.207379	5.4473	5.11389e-08	1.45338e-06
AT5G03380	5417.91	0.840207	0.154291	5.44561	5.16295e-08	1.46365e-06
AT2G29065	211.261	1.14308	0.21011	5.44039	5.31642e-08	1.50528e-06
AT4G11280	1874.15	1.1403	0.20992	5.43207	5.57043e-08	1.57326e-06
AT5G40880	314.023	1.11077	0.204475	5.43229	5.56349e-08	1.57326e-06
AT1G02440	36.8552	1.85857	0.342291	5.42981	5.64149e-08	1.59135e-06
AT1G74750	675.085	1.19571	0.220592	5.42044	5.9451e-08	1.67283e-06
AT5G38530	1316.05	0.865	0.159815	5.41251	6.21463e-08	1.74433e-06
AT5G08300	2519.09	0.656707	0.121527	5.40379	6.52462e-08	1.82907e-06
AT1G67800	624.507	0.99106	0.183509	5.40061	6.64144e-08	1.85952e-06
AT2G35730	91.3741	1.47192	0.273092	5.38983	7.05224e-08	1.96725e-06
AT5G60760	514.403	0.971252	0.180324	5.38615	7.19841e-08	2.00555e-06
AT2G32250	1097.28	1.04909	0.195175	5.37511	7.65346e-08	2.1271e-06
AT3G26680	1070	0.960842	0.17894	5.36963	7.88985e-08	2.19011e-06
AT1G33610	487.362	0.997851	0.185898	5.36774	7.973e-08	2.21048e-06
AT5G61210	2671.4	0.814873	0.151831	5.36698	8.00676e-08	2.21713e-06
AT1G80840	2096.45	1.16232	0.216588	5.3665	8.02809e-08	2.22032e-06
AT2G20010	1114.01	0.888353	0.165654	5.36271	8.19812e-08	2.26182e-06
AT5G53560	5366.07	0.70764	0.13206	5.35846	8.39325e-08	2.31284e-06
AT5G18310	1529.36	0.843039	0.157364	5.35724	8.45032e-08	2.32574e-06
AT5G09800	69.6337	1.57049	0.293237	5.35569	8.52325e-08	2.34012e-06
AT4G23470	3843.42	0.916625	0.171146	5.3558	8.51789e-08	2.34012e-06
AT5G44060	630.878	1.06923	0.199724	5.35355	8.62448e-08	2.36505e-06
AT4G02410	1176.57	1.12031	0.209428	5.34936	8.82635e-08	2.41748e-06
AT5G17990	2063.79	0.825822	0.154455	5.34667	8.95861e-08	2.45074e-06
AT3G26910	1146.87	1.22296	0.228995	5.34057	9.26561e-08	2.53167e-06
AT1G55920	5567.38	1.30382	0.244271	5.33758	9.41938e-08	2.57058e-06
AT2G16500	9243.01	0.800084	0.150005	5.33372	9.62212e-08	2.62275e-06
AT5G24600	63.6313	1.67071	0.313286	5.33284	9.66856e-08	2.63224e-06
AT4G30490	2141.63	1.20825	0.227077	5.3209	1.03258e-07	2.8078e-06
AT3G26840	328.078	0.964311	0.181279	5.31949	1.04056e-07	2.8261e-06
AT5G49480	7621.34	1.16402	0.21884	5.31901	1.04333e-07	2.83023e-06
AT4G01070	3753.08	1.08038	0.203439	5.3106	1.09262e-07	2.95687e-06
AT3G08640	1516.88	0.798685	0.150486	5.30736	1.11222e-07	3.00632e-06
AT5G39090	148.768	1.42365	0.268311	5.30598	1.12067e-07	3.02556e-06
AT1G71000	26.3087	1.89644	0.357926	5.2984	1.16824e-07	3.15021e-06
AT3G10720	2986.62	1.02728	0.194035	5.29429	1.19482e-07	3.21805e-06
AT2G46750	1815.77	1.30593	0.24673	5.29294	1.20368e-07	3.23808e-06
AT1G09970	12516.8	1.07239	0.20289	5.28556	1.25319e-07	3.36328e-06
AT2G41835	441.033	1.28658	0.244173	5.26913	1.37071e-07	3.67431e-06
AT4G35190	59.627	1.60753	0.305199	5.26715	1.38562e-07	3.70988e-06
AT4G35380	505.887	0.875426	0.166324	5.26336	1.41444e-07	3.78259e-06
AT3G22890	18744.6	0.959332	0.182394	5.25965	1.44329e-07	3.85519e-06
AT1G53540	439.208	1.84312	0.350458	5.25917	1.44704e-07	3.86066e-06
AT5G04170	2000.16	0.903214	0.172122	5.24753	1.54151e-07	4.10786e-06
AT4G08470	1155.69	0.812814	0.154913	5.2469	1.54676e-07	4.117e-06
AT5G59680	565.944	0.847804	0.161631	5.2453	1.56031e-07	4.14818e-06
AT4G13505	44.249	1.78159	0.339764	5.24361	1.57461e-07	4.18131e-06
AT3G47820	369.712	1.11363	0.212467	5.24144	1.59327e-07	4.22591e-06
AT1G78860	276.462	1.18982	0.227485	5.23032	1.69213e-07	4.48286e-06
AT1G11925	31.0498	1.87412	0.358627	5.22583	1.73377e-07	4.5878e-06
AT3G63010	653.645	0.894154	0.171298	5.21987	1.79046e-07	4.72677e-06
AT5G52750	285.067	1.34617	0.258097	5.21576	1.83062e-07	4.82716e-06
AT3G25730	243.43	1.0731	0.205823	5.21371	1.851e-07	4.87523e-06
AT4G14368	38.2325	1.85361	0.355767	5.21018	1.88661e-07	4.9575e-06
AT1G66830	50.9504	1.6041	0.30793	5.20931	1.89546e-07	4.97497e-06
AT5G35370	592.713	0.897678	0.172385	5.20739	1.91517e-07	5.0209e-06
AT2G17130	1169.6	0.780715	0.149966	5.20596	1.93001e-07	5.05395e-06
AT4G12490	316.372	1.46687	0.281801	5.20531	1.9367e-07	5.06561e-06
AT3G03165	33.6277	1.82792	0.351209	5.20464	1.94368e-07	5.07801e-06
AT3G60415	356.784	1.23859	0.238261	5.19848	2.0093e-07	5.24339e-06
AT2G05520	9832.38	0.79546	0.153066	5.19685	2.0269e-07	5.28324e-06
AT5G63680	1303.29	0.692328	0.133867	5.17177	2.31891e-07	6.0305e-06
AT2G38940	408.489	0.969408	0.187546	5.16892	2.35454e-07	6.10914e-06
AT4G30210	9065.88	0.995121	0.192605	5.16665	2.38324e-07	6.17652e-06
AT4G25670	2201.73	0.908342	0.175837	5.16583	2.39375e-07	6.19667e-06
AT1G51760	3640.58	1.2925	0.250224	5.16538	2.39955e-07	6.20459e-06
AT1G17330	789.696	1.02769	0.198973	5.165	2.4044e-07	6.21003e-06
AT4G34230	1836.43	1.08093	0.209598	5.15714	2.50743e-07	6.46878e-06
AT4G29810	1222.45	0.703989	0.136513	5.15692	2.51041e-07	6.46908e-06
AT2G19130	445.277	0.988933	0.191866	5.15429	2.54588e-07	6.55304e-06
AT4G16260	2866.22	0.997838	0.193879	5.1467	2.65115e-07	6.81625e-06
AT1G28370	122.225	1.19813	0.232849	5.1455	2.66803e-07	6.84412e-06
AT2G28940	476.163	0.809946	0.157442	5.14443	2.68339e-07	6.87574e-06
AT5G16960	692.851	1.22921	0.239243	5.13791	2.77812e-07	7.1024e-06
AT1G28680	867.26	0.706599	0.137695	5.13162	2.87262e-07	7.31921e-06
AT3G54110	2537.72	0.730219	0.142391	5.12826	2.92427e-07	7.44242e-06
AT3G06300	977.066	0.805256	0.157034	5.12792	2.92958e-07	7.44758e-06
AT1G30070	629.44	0.819973	0.160326	5.11441	3.14725e-07	7.98301e-06
AT1G09940	1477.5	0.908072	0.177565	5.11402	3.15382e-07	7.99073e-06
AT3G12580	6417.94	1.75074	0.342577	5.11049	3.21331e-07	8.12329e-06
AT4G37770	102.19	1.58774	0.31072	5.10987	3.22383e-07	8.13174e-06
AT5G36880	4438.08	0.78822	0.154333	5.10726	3.26866e-07	8.23565e-06
AT5G47420	609.493	0.815507	0.159683	5.10704	3.27239e-07	8.23589e-06
AT5G28540	9090.78	1.01858	0.19971	5.1003	3.39113e-07	8.51789e-06
AT2G04495	16.9984	1.83243	0.359281	5.10025	3.39196e-07	8.51789e-06
AT3G24503	4802.16	0.788922	0.154775	5.09722	3.44669e-07	8.64573e-06
AT3G55840	190.676	1.16406	0.228507	5.09421	3.50205e-07	8.77488e-06
AT2G41170	354.649	0.974334	0.191301	5.09321	3.5206e-07	8.81162e-06
AT4G39950	1965.61	1.22842	0.241233	5.09224	3.53861e-07	8.84692e-06
AT4G21410	3798.02	0.956396	0.188159	5.08292	3.71683e-07	9.28224e-06
AT1G02170	1140.4	0.915339	0.180194	5.07974	3.77954e-07	9.42844e-06
AT5G56010	8436.56	0.886576	0.174661	5.07599	3.85494e-07	9.60598e-06
AT4G15400	197.671	1.1058	0.218105	5.07001	3.97801e-07	9.89894e-06
AT5G42440	204.619	1.12567	0.222124	5.06776	4.02522e-07	9.99729e-06
AT3G15340	111.689	1.33463	0.263559	5.06387	4.10838e-07	1.01927e-05
AT3G59570	231.069	0.942983	0.186266	5.06257	4.13649e-07	1.024e-05
AT3G19130	2149.26	0.763195	0.150842	5.05956	4.20233e-07	1.03916e-05
AT4G23150	18.5792	1.8143	0.358866	5.05565	4.28934e-07	1.05952e-05
AT1G10417	76.2994	1.53266	0.303328	5.05282	4.35333e-07	1.07415e-05
AT2G22470	654.404	1.05489	0.208928	5.04908	4.43942e-07	1.0942e-05
AT4G23570	2401.54	1.00718	0.19952	5.04803	4.46392e-07	1.09905e-05
AT4G34120	3496.4	0.715027	0.141663	5.04739	4.47895e-07	1.10155e-05
AT2G35610	1408.56	0.730061	0.144799	5.04191	4.60913e-07	1.13234e-05
AT2G21620	4165.05	1.14364	0.226981	5.03848	4.69231e-07	1.15152e-05
AT5G10820	525.954	0.973209	0.193173	5.03803	4.70348e-07	1.15301e-05
AT5G49520	361.972	1.06229	0.211451	5.02381	5.0656e-07	1.24044e-05
AT3G55740	569.092	0.95932	0.19119	5.01762	5.2316e-07	1.27971e-05
AT1G74790	2095.43	0.941653	0.187767	5.01501	5.30318e-07	1.29582e-05
AT2G47730	14675.7	1.02415	0.20452	5.00758	5.51178e-07	1.34389e-05
AT5G39050	3296.95	1.14383	0.228443	5.00706	5.52688e-07	1.34612e-05
AT5G59820	919.82	1.18033	0.236115	4.99897	5.76365e-07	1.40078e-05
AT4G28755	70.3993	1.68731	0.337564	4.9985	5.77784e-07	1.40175e-05
AT3G55950	333.363	0.953145	0.190717	4.9977	5.8019e-07	1.40555e-05
AT1G07890	22323.5	0.727062	0.14551	4.99664	5.83371e-07	1.41175e-05
AT5G22060	4193.48	1.00333	0.200865	4.99505	5.88207e-07	1.42193e-05
AT4G00240	187.067	1.13957	0.228155	4.99473	5.89179e-07	1.42276e-05
AT5G04310	344.625	1.10421	0.221146	4.99313	5.94101e-07	1.43312e-05
AT5G65140	436.57	0.950915	0.190631	4.98824	6.09317e-07	1.46826e-05
AT2G16060	565.092	0.892599	0.178998	4.98664	6.14375e-07	1.47887e-05
AT5G45380	684.015	1.00369	0.201291	4.98628	6.15545e-07	1.48012e-05
AT1G77280	500.413	0.760103	0.152647	4.97948	6.37562e-07	1.53143e-05
AT1G35710	530.435	1.00738	0.202405	4.97705	6.45607e-07	1.54911e-05
AT5G24430	1036.64	0.862298	0.173329	4.97491	6.52779e-07	1.56467e-05
AT2G43140	1254.55	1.03438	0.207989	4.97325	6.58382e-07	1.57643e-05
AT3G10300	1114.56	0.952011	0.191444	4.9728	6.59933e-07	1.57847e-05
AT1G29120	1362.61	0.675939	0.13598	4.97085	6.66592e-07	1.59272e-05
AT2G15220	224.991	1.31845	0.26549	4.9661	6.83128e-07	1.63051e-05
AT3G46690	691.325	1.13976	0.229647	4.96309	6.93816e-07	1.65428e-05
AT1G06135	11.8625	1.76725	0.356191	4.96154	6.99381e-07	1.66579e-05
AT5G15650	4280.38	0.757876	0.152781	4.96053	7.0301e-07	1.67268e-05
AT1G11330	1047.61	0.781275	0.157522	4.95978	7.05735e-07	1.6774e-05
AT3G15352	299.393	0.853114	0.172031	4.95907	7.08302e-07	1.68174e-05
AT5G56030	9703.78	0.87568	0.176656	4.95699	7.15956e-07	1.69813e-05
AT5G59530	179.263	1.33406	0.26934	4.95306	7.30544e-07	1.73092e-05
AT3G61760	118.564	1.28952	0.260431	4.95149	7.36477e-07	1.74315e-05
AT3G09270	892.198	0.7668	0.154901	4.95025	7.41179e-07	1.75245e-05
AT1G27350	1287.74	0.877302	0.177439	4.94425	7.6437e-07	1.80351e-05
AT1G76130	516.976	1.0354	0.209501	4.94224	7.72318e-07	1.81848e-05
AT5G63770	1034.03	0.74211	0.150197	4.9409	7.77616e-07	1.82905e-05
AT5G42380	119.019	1.5721	0.31833	4.93857	7.86981e-07	1.84916e-05
AT1G65840	2520.04	0.686357	0.139088	4.93468	8.02803e-07	1.88438e-05
AT2G41880	827.961	0.943789	0.191266	4.93444	8.03807e-07	1.88478e-05
AT5G01950	1221.41	0.917275	0.185916	4.93381	8.06405e-07	1.88892e-05
AT4G22305	209.891	1.15279	0.23367	4.9334	8.08098e-07	1.89093e-05
AT1G22900	161.345	1.22136	0.247701	4.93079	8.18972e-07	1.9144e-05
AT3G02230	3193.05	0.776875	0.157728	4.92541	8.4185e-07	1.96383e-05
AT1G58590	164.78	1.11064	0.225629	4.92241	8.54847e-07	1.99209e-05
AT1G19360	1497.6	0.754712	0.153385	4.92037	8.63827e-07	2.01095e-05
AT3G57380	84.9296	1.40185	0.284954	4.91958	8.67314e-07	2.017e-05
AT1G16670	510.195	0.964108	0.195989	4.91919	8.69017e-07	2.01888e-05
AT1G55020	3141.78	0.934119	0.189919	4.9185	8.72084e-07	2.02393e-05
AT4G12070	560.973	0.918691	0.186964	4.91374	8.93558e-07	2.07165e-05
AT4G15236	67.8603	1.45534	0.296299	4.91172	9.02792e-07	2.08989e-05
AT5G52830	240.067	1.017	0.20706	4.91162	9.03272e-07	2.08989e-05
AT4G18195	26.333	1.74422	0.355139	4.91138	9.04374e-07	2.0903e-05
AT2G02930	127.91	1.53688	0.313126	4.90818	9.19242e-07	2.1225e-05
AT5G51640	575.698	0.869835	0.177261	4.90707	9.24455e-07	2.1302e-05
AT2G43570	251.332	1.28708	0.262317	4.90658	9.26782e-07	2.13339e-05
AT5G49680	447.087	0.947819	0.193883	4.88862	1.01544e-06	2.32566e-05
AT5G44290	3189.36	0.784197	0.160654	4.88129	1.05396e-06	2.41144e-05
AT3G51440	179.028	1.22228	0.250624	4.87696	1.07735e-06	2.45998e-05
AT1G14200	551.55	1.17453	0.241017	4.87324	1.09781e-06	2.50417e-05
AT2G43610	1859.74	0.80386	0.165087	4.86932	1.11984e-06	2.55185e-05
AT4G34200	6569.21	0.655961	0.134793	4.86644	1.13625e-06	2.58146e-05
AT4G23230	33.9536	1.65475	0.340608	4.85822	1.18444e-06	2.68287e-05
AT5G54780	559.657	0.886239	0.182523	4.85549	1.20089e-06	2.712e-05
AT4G26940	1597.71	0.626732	0.129075	4.85556	1.20049e-06	2.712e-05
AT2G44080	1536.55	0.921144	0.189977	4.84871	1.24269e-06	2.79979e-05
AT3G24420	983.356	1.14032	0.235186	4.84858	1.24347e-06	2.79979e-05
AT4G33430	3545.95	0.894086	0.184447	4.8474	1.25088e-06	2.81369e-05
AT3G57750	620.469	0.838754	0.173292	4.84012	1.29757e-06	2.91003e-05
AT1G61810	101.54	1.3862	0.286396	4.84016	1.29735e-06	2.91003e-05
AT5G63320	5251.98	0.877287	0.181418	4.83571	1.32668e-06	2.97106e-05
AT1G65240	52.799	1.45493	0.301011	4.83348	1.34167e-06	3.00001e-05
AT2G26650	1802.14	0.803287	0.166369	4.82835	1.3767e-06	3.07531e-05
AT1G21010	407.889	0.954012	0.197679	4.82606	1.39259e-06	3.10773e-05
AT1G26240	96.7624	1.4559	0.301804	4.824	1.40705e-06	3.13691e-05
AT5G46520	121.851	1.16218	0.240933	4.82368	1.40933e-06	3.13892e-05
AT5G46330	1390.94	0.87106	0.180849	4.8165	1.46095e-06	3.25069e-05
AT2G28970	163.367	1.13238	0.235183	4.81489	1.47284e-06	3.27393e-05
AT1G53920	316.27	0.8814	0.183099	4.81378	1.48105e-06	3.28894e-05
AT2G05875	39.3476	1.57534	0.327411	4.8115	1.49803e-06	3.3234e-05
AT4G26970	9284.64	0.889831	0.184972	4.81064	1.50452e-06	3.33452e-05
AT4G12735	80.3805	1.62686	0.338249	4.80967	1.5118e-06	3.34411e-05
AT5G14760	964.279	0.72361	0.150516	4.80754	1.52802e-06	3.37341e-05
AT4G38410	96.9754	1.26222	0.262885	4.80141	1.5755e-06	3.47484e-05
AT5G12880	121.818	1.21488	0.253082	4.80036	1.58384e-06	3.48983e-05
AT1G28390	423.229	0.911192	0.19021	4.79045	1.66409e-06	3.65599e-05
AT1G19130	785.423	0.793767	0.165697	4.79047	1.66393e-06	3.65599e-05
AT3G51160	1714.85	0.833611	0.174085	4.78852	1.68019e-06	3.6878e-05
AT3G49620	6547.84	1.72274	0.35988	4.78698	1.69308e-06	3.71249e-05
AT4G11480	31.2115	1.71701	0.358887	4.78427	1.71606e-06	3.75924e-05
AT5G46350	58.8513	1.49698	0.313177	4.77998	1.75309e-06	3.83295e-05
AT5G22520	54.7824	1.63967	0.343434	4.77434	1.80294e-06	3.93813e-05
AT5G44063	134.892	1.21806	0.255247	4.77209	1.82321e-06	3.97856e-05
AT3G05050	1229.71	0.641192	0.134387	4.77122	1.8311e-06	3.99194e-05
AT1G21313	56.1767	1.7156	0.359662	4.77004	1.84193e-06	4.0117e-05
AT5G64120	10571	1.66343	0.348897	4.76769	1.86352e-06	4.0548e-05
AT5G57480	510.424	0.960078	0.201563	4.76317	1.90574e-06	4.14271e-05
AT3G03000	247.589	0.964939	0.20274	4.75948	1.94092e-06	4.20792e-05
AT3G24090	238.298	1.09109	0.229239	4.75964	1.93941e-06	4.20792e-05
AT1G10410	1760.13	0.747047	0.157228	4.75136	2.02052e-06	4.37542e-05
AT1G69900	429.301	1.0966	0.230979	4.74764	2.05807e-06	4.45246e-05
AT3G29000	155.371	1.41876	0.298874	4.74703	2.06424e-06	4.46156e-05
AT5G65240	696.947	0.85644	0.180491	4.74506	2.08443e-06	4.49234e-05
AT3G62600	2598.79	0.925812	0.195185	4.74324	2.10323e-06	4.52853e-05
AT1G09253	27.993	1.65768	0.349639	4.74113	2.12533e-06	4.57179e-05
AT3G57740	53.8311	1.42341	0.300466	4.73733	2.1655e-06	4.65376e-05
AT2G01670	2388.93	0.686866	0.145065	4.7349	2.19168e-06	4.70556e-05
AT3G22160	445.375	1.05134	0.222203	4.73146	2.22911e-06	4.7814e-05
AT1G51915	16.2513	1.69161	0.357952	4.72581	2.29203e-06	4.91172e-05
AT2G02810	530.917	1.11132	0.235475	4.71947	2.36459e-06	5.06241e-05
AT5G58840	61.782	1.59758	0.339301	4.70845	2.49612e-06	5.33897e-05
AT1G21310	16971.1	0.696966	0.148126	4.70521	2.53608e-06	5.4142e-05
AT3G49210	532.135	0.974846	0.20725	4.70371	2.55472e-06	5.44887e-05
AT1G65610	527.838	1.11908	0.238006	4.70189	2.57759e-06	5.49248e-05
AT2G20900	1295.95	0.771626	0.164145	4.70088	2.59038e-06	5.51453e-05
AT4G02890	8385.18	0.62688	0.133675	4.68958	2.73762e-06	5.81161e-05
AT3G16030	291.754	0.93065	0.198552	4.68719	2.76978e-06	5.86887e-05
AT5G12170	1592.21	0.849864	0.181315	4.68723	2.76931e-06	5.86887e-05
AT5G20400	849.457	0.875156	0.186729	4.68676	2.77559e-06	5.87569e-05
AT5G38200	1643.57	0.991255	0.211568	4.68529	2.7957e-06	5.91273e-05
AT2G15042	333.704	1.0371	0.221509	4.68198	2.84124e-06	6.00343e-05
AT4G14746	445.213	0.915327	0.195623	4.67904	2.88218e-06	6.08428e-05
AT1G61250	2305.17	0.716811	0.153283	4.67638	2.91985e-06	6.15234e-05
AT2G31880	1888.58	0.776247	0.166084	4.67382	2.95652e-06	6.20651e-05
AT5G02760	1248.75	0.74497	0.159389	4.6739	2.95536e-06	6.20651e-05
AT1G07090	309.728	0.779104	0.166759	4.67203	2.98243e-06	6.25508e-05
AT5G55050	293.848	1.01728	0.217766	4.67142	2.9913e-06	6.2679e-05
AT5G27765	18.622	1.67809	0.359874	4.66299	3.11644e-06	6.51204e-05
AT3G22942	238.642	0.895834	0.192421	4.6556	3.23037e-06	6.73767e-05
AT3G23120	24.5608	1.64362	0.353084	4.65503	3.23928e-06	6.75003e-05
AT5G57710	6112.14	0.932249	0.200475	4.65021	3.31604e-06	6.90363e-05
AT3G45650	433.111	0.889574	0.191336	4.64928	3.33089e-06	6.92818e-05
AT5G05735	8.65653	1.55618	0.334772	4.64846	3.34414e-06	6.94937e-05
AT4G17720	1032.24	0.688121	0.148056	4.64771	3.35649e-06	6.96864e-05
AT3G44190	5113.73	1.09896	0.236565	4.64548	3.39285e-06	7.03123e-05
AT3G09340	112.177	1.66223	0.357849	4.64506	3.39973e-06	7.03906e-05
AT4G33565	945.583	0.833805	0.179578	4.64314	3.43148e-06	7.09832e-05
AT5G18490	1168.67	0.929447	0.200247	4.64151	3.45871e-06	7.14812e-05
AT3G59880	126.474	1.15265	0.248474	4.63894	3.50209e-06	7.23115e-05
AT1G61150	1515.33	0.824693	0.177985	4.63349	3.59559e-06	7.41745e-05
AT4G30350	1619.2	0.92633	0.199994	4.63178	3.62526e-06	7.46507e-05
AT2G22500	891	0.989972	0.213888	4.62847	3.68379e-06	7.57871e-05
AT5G61520	739.907	0.864064	0.18676	4.6266	3.7171e-06	7.6403e-05
AT4G28550	287.386	0.895695	0.194265	4.61069	4.01325e-06	8.22661e-05
AT2G36890	97.8955	1.15104	0.249883	4.60633	4.0984e-06	8.39358e-05
AT4G25200	95.5913	1.53492	0.333316	4.60501	4.12455e-06	8.4395e-05
AT3G12500	608.758	0.698507	0.151715	4.60406	4.14327e-06	8.47015e-05
AT3G18950	177.507	1.19615	0.260052	4.59966	4.2319e-06	8.64352e-05
AT5G65270	1031.7	0.754737	0.164535	4.5871	4.49451e-06	9.16338e-05
AT4G28710	2059.55	0.751622	0.163893	4.58604	4.51728e-06	9.20153e-05
AT3G03020	366.399	1.02246	0.22299	4.58521	4.53524e-06	9.22981e-05
AT4G16840	285.802	0.880129	0.191991	4.58422	4.55693e-06	9.26562e-05
AT5G02100	762.778	0.666564	0.145637	4.57689	4.71934e-06	9.58362e-05
AT2G32660	151.489	1.1541	0.252164	4.57678	4.72179e-06	9.58362e-05
AT3G57640	80.4989	1.25646	0.274541	4.57659	4.72608e-06	9.58374e-05
AT4G31950	97.9117	1.62724	0.355957	4.57146	4.84346e-06	9.79547e-05
AT3G26670	1448.49	0.757057	0.165622	4.57099	4.8542e-06	9.79969e-05
AT5G66850	1298.24	0.70643	0.154541	4.57114	4.85066e-06	9.79969e-05
AT3G25070	1011.66	0.706459	0.15468	4.56724	4.94188e-06	9.95895e-05
AT5G22270	537.852	1.04714	0.229369	4.56533	4.98703e-06	0.00010041
AT5G44065	28.3339	1.60446	0.351476	4.56493	4.99663e-06	0.000100514
AT4G23320	24.1612	1.62536	0.356106	4.56428	5.01218e-06	0.000100737
AT1G69810	329.193	0.821699	0.180075	4.5631	5.04047e-06	0.000101216
AT5G19880	12.39	1.62597	0.357014	4.55436	5.25444e-06	0.000105326
AT3G16050	310.979	0.942723	0.207076	4.55253	5.30039e-06	0.000106059
AT1G18890	1390.72	0.845963	0.185836	4.55219	5.30894e-06	0.000106137
AT1G70170	126.395	1.08141	0.237783	4.54788	5.41901e-06	0.000108126
AT5G13420	3054.72	0.658413	0.144803	4.54695	5.44294e-06	0.000108433
AT1G17744	12.8515	1.62333	0.357231	4.54419	5.51471e-06	0.000109766
AT5G08790	5014.93	1.01067	0.22251	4.54214	5.56861e-06	0.000110645
AT2G41180	283.314	1.03769	0.228494	4.54141	5.58794e-06	0.000110931
AT5G46500	272.471	1.04061	0.23007	4.523	6.09687e-06	0.000120928
AT2G01650	802.41	0.689045	0.152393	4.52149	6.14071e-06	0.000121691
AT1G65500	189.573	1.36659	0.302361	4.51971	6.19239e-06	0.000122605
AT2G24490	513.572	1.05927	0.234376	4.51953	6.19763e-06	0.000122605
AT5G06860	4289.65	1.10109	0.243774	4.51684	6.27691e-06	0.000124065
AT4G04480	16.0876	1.62362	0.359866	4.51173	6.43019e-06	0.000126984
AT2G45300	2329.86	0.72031	0.159738	4.50932	6.50349e-06	0.000128319
AT2G36580	2147.81	0.697706	0.154903	4.50416	6.66375e-06	0.000131367
AT4G37530	908.975	0.981675	0.217969	4.50373	6.67699e-06	0.000131513
AT5G03390	216.934	0.969936	0.215465	4.50159	6.74466e-06	0.000132731
AT3G51920	2064.48	0.619273	0.137608	4.50026	6.78713e-06	0.000133451
AT5G11975	21.8681	1.61753	0.359703	4.49685	6.89687e-06	0.000135491
AT5G51160	79.3438	1.1824	0.262959	4.49651	6.90763e-06	0.000135585
AT1G65845	1348.04	1.14012	0.253754	4.49303	7.02153e-06	0.000137701
AT5G35320	544.271	0.779447	0.173634	4.48902	7.15529e-06	0.000140203
AT2G47520	45.0997	1.5228	0.339343	4.48751	7.2061e-06	0.000141076
AT5G64700	173.636	1.21076	0.270011	4.48412	7.32157e-06	0.00014309
AT1G04100	231.167	0.919634	0.205111	4.4836	7.33941e-06	0.000143315
AT3G57330	3869.16	0.959525	0.214138	4.48088	7.43373e-06	0.000145031
AT3G42180	86.7389	1.17192	0.261798	4.47644	7.58981e-06	0.000147949
AT3G21070	1051.25	0.759505	0.169782	4.47341	7.6983e-06	0.000149806
AT5G09155	58.523	1.59416	0.356415	4.47275	7.72211e-06	0.00015014
AT5G46295	72.7667	1.37178	0.306865	4.4703	7.81082e-06	0.000151735
AT1G50360	1106.23	0.763908	0.170899	4.46995	7.82394e-06	0.00015186
AT3G21781	56.3231	1.37213	0.30706	4.46861	7.87278e-06	0.000152677
AT1G23450	153.228	1.20735	0.270325	4.46629	7.9588e-06	0.000154213
AT3G53230	638.971	0.8573	0.192021	4.46461	8.02148e-06	0.000155295
AT3G10985	3986.22	0.867203	0.194262	4.4641	8.04061e-06	0.000155532
AT3G59900	427.895	1.00865	0.226329	4.45655	8.32878e-06	0.000160558
AT5G56350	1469.98	0.607055	0.136624	4.44324	8.86125e-06	0.000170387
AT1G54050	284.655	1.09054	0.245592	4.44043	8.97801e-06	0.000172486
AT1G68390	61.1879	1.42603	0.321196	4.43974	9.00681e-06	0.000172893
AT1G08450	1737.92	0.605013	0.136507	4.4321	9.33215e-06	0.000178835
AT3G50740	2474.06	0.821774	0.185553	4.42878	9.47673e-06	0.000181299
AT3G26200	521.755	0.833831	0.188302	4.42815	9.50467e-06	0.00018168
AT4G23610	19.6241	1.5869	0.358839	4.42233	9.76424e-06	0.00018617
AT2G33120	2890.33	0.606931	0.137488	4.41443	1.01277e-05	0.000192775
AT1G29640	134.664	1.05417	0.239009	4.4106	1.03087e-05	0.000196055
AT1G17170	6737.68	1.14329	0.259228	4.41037	1.03193e-05	0.000196078
AT2G28960	365.331	0.92369	0.209537	4.40824	1.04214e-05	0.000197701
AT3G04620	113.416	1.14563	0.260169	4.40343	1.06552e-05	0.000201799
AT3G52710	492.434	0.788697	0.179218	4.40077	1.07868e-05	0.00020412
AT2G17760	1015.11	0.815649	0.185356	4.40045	1.08028e-05	0.000204253
AT3G57700	67.2639	1.47539	0.335458	4.39813	1.09186e-05	0.000206269
AT1G42990	1857.11	0.887573	0.201828	4.39766	1.09423e-05	0.000206545
AT5G54840	385.292	0.83033	0.188826	4.39733	1.0959e-05	0.000206688
AT3G45330	41.4116	1.41093	0.321011	4.39527	1.10635e-05	0.000208311
AT5G22140	5688.73	1.50462	0.342947	4.38734	1.14746e-05	0.000215694
AT5G50760	354.256	0.762848	0.173934	4.38585	1.15533e-05	0.000216993
AT1G64160	608.79	1.57485	0.359129	4.38518	1.15889e-05	0.000217482
AT3G03440	353.851	0.877011	0.200259	4.37938	1.19016e-05	0.000222979
AT3G01290	11770.5	0.925032	0.211429	4.37515	1.21351e-05	0.000227167
AT5G35200	2430.59	0.747804	0.170929	4.37493	1.2147e-05	0.000227201
AT5G49770	254.887	0.949848	0.217166	4.37384	1.22079e-05	0.000227964
AT4G29670	1751.71	0.772295	0.17678	4.36867	1.25005e-05	0.000233044
AT3G16565	177.706	0.915405	0.209761	4.36403	1.27688e-05	0.000237266
AT5G57050	422.947	0.920933	0.21111	4.36235	1.28673e-05	0.000238899
AT4G23850	11525.1	0.790778	0.181467	4.3577	1.31439e-05	0.000243635
AT1G62840	102.485	1.2489	0.286828	4.35416	1.33575e-05	0.000247393
AT4G37030	173.727	1.05123	0.241598	4.35117	1.35415e-05	0.000250594
AT5G48970	625.102	0.696652	0.160188	4.34896	1.36786e-05	0.000252925
AT4G22470	1127.72	1.55949	0.358605	4.34877	1.36905e-05	0.000252939
AT1G11540	225.093	0.964735	0.222083	4.34403	1.39895e-05	0.000258253
AT5G57123	26.0487	1.51682	0.349735	4.33705	1.44409e-05	0.000265936
AT5G14930	527.657	0.845588	0.195233	4.33118	1.48311e-05	0.0002729
AT3G07600	57.6593	1.41866	0.3279	4.3265	1.515e-05	0.000278541
AT3G13050	402.749	0.754823	0.174823	4.31764	1.57708e-05	0.00028972
AT4G01370	1862.07	0.647752	0.150076	4.31616	1.58768e-05	0.00029143
AT5G25940	953.405	0.793643	0.184054	4.31202	1.61771e-05	0.000296462
AT5G03610	1654.68	0.775034	0.179761	4.31148	1.62164e-05	0.000296943
AT3G13600	132.921	1.11463	0.258593	4.31038	1.62971e-05	0.000298179
AT3G12740	3455.31	0.744371	0.172901	4.3052	1.66834e-05	0.000304509
AT4G32300	1600.03	0.711678	0.16543	4.30198	1.69279e-05	0.000308012
AT2G33600	835.056	0.672913	0.15642	4.30196	1.69297e-05	0.000308012
AT5G46230	86.1247	1.1557	0.268724	4.30071	1.7025e-05	0.000309496
AT2G30720	596.394	0.815626	0.189744	4.29857	1.71905e-05	0.000312255
AT5G38540	62.7782	1.39426	0.324736	4.29352	1.75858e-05	0.000318925
AT3G53670	1230.38	0.617096	0.143721	4.2937	1.75723e-05	0.000318925
AT2G26820	279.716	0.98795	0.230129	4.29303	1.7625e-05	0.000319379
AT5G61790	7553.16	0.882654	0.205837	4.28813	1.80184e-05	0.000326247
AT3G44860	700.929	1.53702	0.358901	4.28257	1.84744e-05	0.000333969
AT1G56242	9.58029	1.47807	0.345329	4.28018	1.86745e-05	0.000337318
AT1G26690	434.549	0.667613	0.156016	4.27914	1.87616e-05	0.000338352
AT5G17060	421.307	0.675148	0.157817	4.27804	1.88549e-05	0.000339764
AT1G23090	1316.24	0.706874	0.165327	4.27562	1.90602e-05	0.00034319
AT5G22500	781.745	0.688605	0.161312	4.26877	1.96553e-05	0.000353342
AT5G10190	630.539	0.663608	0.155519	4.26705	1.98073e-05	0.000355793
AT2G16660	476.824	0.918213	0.215202	4.26676	1.98334e-05	0.000355926
AT3G13650	239.222	1.1864	0.278065	4.26661	1.98461e-05	0.000355926
AT5G58540	206.606	0.843107	0.197658	4.26549	1.99462e-05	0.000357439
AT5G37480	401.815	0.816877	0.191566	4.2642	2.0062e-05	0.000359229
AT2G43150	11463	0.595497	0.139658	4.26398	2.00821e-05	0.000359304
AT5G54650	503.687	0.685209	0.160729	4.26313	2.01585e-05	0.000360387
AT5G37840	18.1137	1.53024	0.359002	4.26248	2.02172e-05	0.000361151
AT5G48550	20.8269	1.52902	0.359093	4.258	2.06264e-05	0.000367303
AT1G02450	16.7733	1.52845	0.359084	4.25654	2.07614e-05	0.000369416
AT1G63500	1526.11	0.609113	0.143154	4.25495	2.09099e-05	0.000371767
AT1G34315	462.4	0.701834	0.165023	4.25294	2.10986e-05	0.000374533
AT3G23605	345.814	0.917184	0.215681	4.2525	2.114e-05	0.000374975
AT5G19240	1472.66	0.765199	0.180029	4.25043	2.13358e-05	0.000377855
AT4G00955	238.521	1.00374	0.236491	4.24428	2.19293e-05	0.000388062
AT5G20990	2649.14	0.686714	0.161827	4.2435	2.2006e-05	0.000389117
AT3G25900	452.147	0.830664	0.195823	4.24192	2.21614e-05	0.000391558
AT4G27900	465.738	0.698001	0.164702	4.23796	2.2556e-05	0.00039822
AT4G04990	121.674	0.956856	0.225802	4.2376	2.25926e-05	0.000398555
AT3G49370	194.725	0.960691	0.226888	4.2342	2.29362e-05	0.000404302
AT2G30615	63.2916	1.43265	0.338663	4.2303	2.33375e-05	0.000410418
AT3G56060	586.788	0.772537	0.18281	4.22591	2.37977e-05	0.000417861
AT5G07460	900.82	0.842342	0.199373	4.22494	2.39e-05	0.000419332
AT1G21900	1207.77	0.628588	0.148869	4.22243	2.41684e-05	0.000422732
AT3G23250	468.098	1.5205	0.360317	4.21991	2.44404e-05	0.00042683
AT4G33020	58.1083	1.33838	0.31722	4.21911	2.45267e-05	0.000427723
AT4G24110	331.825	1.18983	0.282011	4.21909	2.45293e-05	0.000427723
AT3G26020	1178.08	0.759126	0.180116	4.21465	2.50164e-05	0.000435547
AT1G58602	7406.32	0.667692	0.15848	4.21309	2.51901e-05	0.000438235
AT3G21520	125.193	1.06133	0.252155	4.20905	2.56449e-05	0.000445561
AT1G20310	29.0978	1.49617	0.355564	4.20787	2.57789e-05	0.000447104
AT4G11290	565.886	0.759772	0.180614	4.20661	2.59228e-05	0.000449256
AT1G21240	14.8422	1.51255	0.359802	4.20385	2.62418e-05	0.000454089
AT4G32650	738.844	0.807695	0.192248	4.20131	2.65379e-05	0.000457815
AT3G50930	499.464	0.947126	0.225545	4.19927	2.67776e-05	0.000461598
AT1G77810	298.758	0.73221	0.174385	4.19882	2.68309e-05	0.000462058
AT2G37150	657.423	0.697922	0.166223	4.1987	2.68451e-05	0.000462058
AT5G48560	620.164	0.716348	0.170855	4.19273	2.75622e-05	0.00047368
AT2G31865	278.007	1.13679	0.271206	4.19162	2.76969e-05	0.000475634
AT5G59510	97.9741	1.32014	0.315023	4.19063	2.7818e-05	0.000476991
AT2G29120	699.019	0.913753	0.218367	4.18448	2.85814e-05	0.000488233
AT4G23250	512.157	0.864034	0.206524	4.18369	2.86816e-05	0.000489575
AT1G31930	2771.41	0.809812	0.193775	4.17912	2.92635e-05	0.000499132
AT2G31141	163.104	0.912395	0.218466	4.17637	2.96192e-05	0.000504439
AT1G33390	803.797	0.663076	0.158924	4.17229	3.01552e-05	0.000513099
AT4G16660	4154.79	0.678102	0.16253	4.17216	3.0173e-05	0.000513099
AT1G22410	5336.3	0.713379	0.171071	4.17008	3.04495e-05	0.000517025
AT5G49780	131.517	1.00145	0.240187	4.16948	3.05299e-05	0.000518003
AT4G37990	1713.62	1.50051	0.360008	4.168	3.07291e-05	0.000520602
AT3G45290	140.998	0.991291	0.238067	4.16391	3.12843e-05	0.000529216
AT4G00760	955.708	0.66731	0.160436	4.15936	3.19145e-05	0.000539072
AT5G43380	148.499	1.00162	0.240892	4.15797	3.21087e-05	0.000541544
AT1G56145	854.579	0.688264	0.165705	4.15356	3.27347e-05	0.000550872
AT2G32400	664.583	0.713288	0.171755	4.15293	3.28241e-05	0.000551966
AT3G04010	542.406	1.1831	0.285225	4.14794	3.35483e-05	0.000563308
AT1G21130	9867.1	0.789975	0.190444	4.14807	3.3529e-05	0.000563308
AT4G04695	314.084	0.748434	0.180686	4.14217	3.44027e-05	0.000577015
AT3G47540	291.85	0.933674	0.22546	4.14119	3.45502e-05	0.000578671
AT2G35510	2364.95	0.596851	0.144129	4.14109	3.45655e-05	0.000578672
AT5G57035	782.982	0.753068	0.181956	4.13874	3.49216e-05	0.000584201
AT1G65790	22.3564	1.44654	0.349687	4.13666	3.52395e-05	0.000588651
AT2G21850	228.634	0.828756	0.20056	4.13221	3.59297e-05	0.000599296
AT2G42350	230.034	0.96014	0.232814	4.12407	3.72243e-05	0.00061952
AT1G61550	45.8779	1.35793	0.329318	4.12346	3.73215e-05	0.000620683
AT1G47480	247.871	0.935935	0.227312	4.11741	3.83162e-05	0.00063629
AT4G31970	42.3477	1.37563	0.334126	4.11711	3.8365e-05	0.000636634
AT3G26090	586.976	0.655273	0.159171	4.11679	3.84187e-05	0.000637058
AT1G77510	1333.49	0.785684	0.191036	4.11275	3.90968e-05	0.000647828
AT5G15640	676.11	0.661272	0.161065	4.10563	4.03209e-05	0.000666163
AT1G14260	72.5999	1.27994	0.311805	4.10492	4.04451e-05	0.000667727
AT1G24145	216.17	1.19609	0.291447	4.10396	4.06129e-05	0.00067001
AT4G11600	3880.68	0.765208	0.186601	4.10076	4.11796e-05	0.000677877
AT2G20142	124.167	1.02958	0.251067	4.1008	4.1172e-05	0.000677877
AT1G65820	2415.02	0.603953	0.147346	4.09887	4.15166e-05	0.000682515
AT2G30750	1255.71	1.41555	0.345411	4.09817	4.16438e-05	0.000684028
AT5G45130	2351.73	0.633744	0.154653	4.09784	4.17031e-05	0.000684504
AT1G77500	667.148	0.922374	0.22516	4.09652	4.19406e-05	0.000687905
AT3G02880	2164.86	0.761957	0.186107	4.09418	4.23658e-05	0.000694375
AT5G28510	22.6527	1.43277	0.350022	4.09337	4.25147e-05	0.000696314
AT4G18930	791.36	0.640587	0.156615	4.09019	4.31017e-05	0.000704908
AT1G63720	334.995	0.831241	0.203451	4.08572	4.3941e-05	0.00071708
AT4G13180	3184.64	0.971236	0.237899	4.08256	4.45427e-05	0.000726376
AT5G54490	330.585	1.0366	0.254029	4.08062	4.49159e-05	0.000731409
AT5G22145	84.2303	1.40396	0.344079	4.08034	4.49691e-05	0.000731749
AT4G18940	129.357	1.27113	0.311603	4.07933	4.51663e-05	0.000733904
AT1G71530	107.932	1.07268	0.2631	4.07709	4.56025e-05	0.00074046
AT4G14220	719.407	0.770016	0.189113	4.07173	4.66653e-05	0.000755551
AT1G34420	92.6559	1.06175	0.26079	4.07131	4.67505e-05	0.00075585
AT4G22970	497.738	0.875058	0.21512	4.06776	4.7467e-05	0.000766887
AT2G41730	402.003	1.17628	0.289246	4.06671	4.7682e-05	0.000769812
AT4G24160	3738.53	0.820881	0.202069	4.06238	4.85759e-05	0.000782569
AT3G51430	446.493	0.854254	0.210357	4.06098	4.8867e-05	0.000786563
AT1G64065	141.979	0.896073	0.22088	4.05683	4.97442e-05	0.000799118
AT4G30600	5968.61	0.710908	0.175355	4.05412	5.03244e-05	0.000807293
AT1G13470	29.5329	1.36523	0.336856	4.05286	5.05949e-05	0.000809911
AT2G30660	75.4148	1.07796	0.266562	4.04395	5.25585e-05	0.000839564
AT5G64100	7399.91	1.02741	0.254125	4.04293	5.2788e-05	0.000842637
AT4G13660	442.113	0.732368	0.18118	4.04221	5.29494e-05	0.000844617
AT4G24290	2566.12	0.640131	0.158606	4.03599	5.43725e-05	0.000865489
AT5G25820	175.024	0.833624	0.20656	4.03576	5.44265e-05	0.00086574
AT5G65300	124.178	1.05548	0.261798	4.03165	5.53869e-05	0.000879782
AT1G61640	374.046	0.7729	0.191811	4.02949	5.58973e-05	0.000887267
AT1G66570	180.595	1.45399	0.36095	4.02823	5.6198e-05	0.000890791
AT1G51680	4405.05	0.622115	0.154483	4.02708	5.64736e-05	0.000894535
AT1G10050	597.965	0.706781	0.175759	4.02131	5.78764e-05	0.000916114
AT1G05347	15.4235	1.44257	0.359423	4.01359	5.98027e-05	0.000943965
AT5G52400	11.8786	1.40596	0.35035	4.01301	5.99505e-05	0.00094564
AT3G22260	392.526	0.781878	0.194848	4.01276	6.00122e-05	0.000945955
AT2G45290	1032.56	0.663613	0.165472	4.01042	6.06121e-05	0.000954082
AT1G63010	2299.22	0.677363	0.169156	4.00436	6.21854e-05	0.000976812
AT3G53600	17.5691	1.44011	0.359956	4.00081	6.31266e-05	0.000990908
AT3G17410	2883.67	0.686368	0.171659	3.99844	6.37628e-05	0.000999757
AT1G63350	358.666	0.809266	0.202399	3.99838	6.37786e-05	0.000999758
AT1G64610	576.151	0.70979	0.17769	3.99455	6.48175e-05	0.00101534
AT1G16540	670.123	0.746943	0.187079	3.99267	6.53329e-05	0.00102271
AT3G05580	573.647	0.779192	0.195197	3.99182	6.55687e-05	0.00102569
AT5G06320	1900.81	0.641857	0.16082	3.99114	6.57556e-05	0.0010279
AT1G68340	182.204	0.846742	0.212177	3.99074	6.58673e-05	0.00102894
AT1G17290	7465.02	0.732925	0.184077	3.98163	6.84435e-05	0.00106624
AT1G23560	175.969	1.00555	0.252889	3.97624	7.00124e-05	0.00108993
AT5G11920	452.488	0.860788	0.216505	3.97584	7.01326e-05	0.00109105
AT3G55130	1236.34	0.607607	0.152898	3.97394	7.06922e-05	0.00109838
AT4G17215	161.836	0.957443	0.241086	3.97138	7.14571e-05	0.0011071
AT1G06800	508.033	0.951238	0.239543	3.97106	7.15538e-05	0.00110784
AT1G17240	66.1869	1.23928	0.312131	3.97039	7.17552e-05	0.0011102
AT1G79670	997.441	0.62801	0.158335	3.96634	7.29838e-05	0.0011269
AT5G54500	8800.67	0.854815	0.215567	3.96543	7.32644e-05	0.00113046
AT4G25230	1587.49	0.589152	0.148581	3.96518	7.334e-05	0.00113085
AT2G37110	3056.54	0.674842	0.170242	3.96401	7.37004e-05	0.00113564
AT4G36480	1540.23	0.625218	0.157849	3.96086	7.468e-05	0.00114995
AT4G29520	693.521	0.811745	0.205259	3.95474	7.66176e-05	0.00117818
AT1G01460	10.3861	1.3662	0.345512	3.95413	7.68122e-05	0.00118037
AT2G31335	8.65768	1.36353	0.345208	3.94989	7.81884e-05	0.00120071
AT2G28840	4476.5	0.597557	0.151524	3.94364	8.02529e-05	0.00122908
AT4G28490	571.611	0.711314	0.18041	3.94276	8.05505e-05	0.0012328
AT3G47780	536.917	0.819294	0.207898	3.94085	8.11933e-05	0.00124026
AT5G18400	1793.74	0.731657	0.185661	3.94082	8.12019e-05	0.00124026
AT4G23200	133.463	0.977082	0.248	3.93985	8.15336e-05	0.00124418
AT2G36880	8743.89	0.593647	0.150696	3.93937	8.16972e-05	0.0012452
AT5G57060	447.001	0.719828	0.182733	3.93922	8.17455e-05	0.0012452
AT5G66558	109.691	0.967131	0.24614	3.92919	8.52311e-05	0.00129481
AT2G04070	53.3436	1.39042	0.354314	3.92427	8.69939e-05	0.00131806
AT1G77450	1020.08	0.856195	0.218362	3.92099	8.8187e-05	0.00133524
AT2G35935	16.4516	1.35254	0.344981	3.92063	8.8318e-05	0.00133633
AT5G10830	457.4	0.864462	0.22055	3.91958	8.87044e-05	0.00134097
AT1G28380	2929.01	0.825069	0.210779	3.91437	9.06398e-05	0.0013669
AT3G20860	273.013	0.884897	0.226111	3.91356	9.09464e-05	0.00136879
AT3G14310	9834.51	0.73053	0.186662	3.91364	9.09137e-05	0.00136879
AT5G13500	1056.23	0.641328	0.163945	3.91185	9.15902e-05	0.00137665
AT2G28710	44.9699	1.22417	0.313113	3.90967	9.24233e-05	0.00138733
AT4G21840	27.4781	1.35618	0.346932	3.90907	9.26539e-05	0.00138987
AT1G22890	759.753	0.726247	0.185938	3.90586	9.38896e-05	0.00140654
AT1G61120	23.4025	1.40586	0.360339	3.90149	9.56015e-05	0.0014303
AT1G10700	835.544	0.642766	0.164744	3.90161	9.55531e-05	0.0014303
AT5G22770	1864.95	0.602455	0.154559	3.89789	9.7035e-05	0.00144983
AT3G01970	607.19	0.978378	0.251019	3.89762	9.71408e-05	0.00145045
AT4G40080	171.046	0.823096	0.211228	3.89672	9.75044e-05	0.00145492
AT2G44070	20.3223	1.40234	0.359973	3.89567	9.79278e-05	0.00146028
AT4G13820	69.9339	1.08657	0.27927	3.89076	9.99298e-05	0.00148427
AT2G25850	2211.74	0.666418	0.171403	3.88801	0.000101071	0.00149823
AT5G53550	3514.68	0.606514	0.15601	3.88766	0.000101214	0.00149843
AT3G18930	505.586	0.637981	0.164194	3.88552	0.000102111	0.00150974
AT5G27610	420.033	0.829014	0.213389	3.88499	0.000102333	0.00151203
AT4G24400	1401.61	0.595893	0.15345	3.88331	0.000103043	0.00152054
AT1G27760	2932.76	0.629723	0.162175	3.88299	0.000103181	0.00152158
AT2G45570	534.639	1.399	0.360347	3.88238	0.000103438	0.00152438
AT3G14840	4242.02	0.637361	0.164312	3.87897	0.000104899	0.00154291
AT5G03160	1095.19	0.73318	0.189073	3.87776	0.000105424	0.00154962
AT3G28340	176.489	1.05336	0.271879	3.87437	0.0001069	0.00156725
AT1G63840	500.14	0.647184	0.167069	3.87375	0.000107175	0.00157026
AT4G26060	406.468	0.788666	0.203629	3.87305	0.00010748	0.00157371
AT4G27070	466.252	0.724199	0.18715	3.86962	0.000109006	0.00159296
AT2G32120	282.631	0.756258	0.195703	3.86432	0.000111397	0.00162581
AT4G07855	25.8209	1.39086	0.360057	3.86288	0.00011206	0.00163337
AT5G41740	984.218	0.723789	0.187369	3.86292	0.000112041	0.00163337
AT3G22121	122.079	1.08196	0.280263	3.86051	0.00011315	0.0016482
AT2G24850	105.475	1.3777	0.357034	3.85873	0.000113976	0.00165917
AT2G16595	200.717	0.814837	0.211187	3.85836	0.000114151	0.00166065
AT1G17890	1093.14	0.601207	0.15595	3.85514	0.000115663	0.00167942
AT3G08710	601.862	0.692709	0.179775	3.85321	0.000116579	0.00169163
AT4G18360	252.599	0.72982	0.1895	3.85129	0.000117498	0.00170383
AT5G04860	710.592	0.588847	0.152936	3.85029	0.000117978	0.00170755
AT1G74020	688.024	0.68226	0.177274	3.84862	0.000118784	0.00171812
AT1G62740	2184.26	0.710646	0.185152	3.83817	0.000123956	0.00178382
AT1G32950	42.8039	1.31684	0.343857	3.82961	0.000128347	0.0018435
AT1G19320	21.8751	1.3541	0.35361	3.82937	0.000128474	0.00184414
AT2G39350	674.498	0.698907	0.182547	3.82864	0.000128854	0.00184726
AT3G21240	623.785	0.635304	0.165948	3.82832	0.00012902	0.00184847
AT4G07255	17.7615	1.33077	0.34764	3.828	0.000129189	0.00184972
AT1G78830	7765.52	0.720624	0.188315	3.8267	0.000129875	0.00185837
AT3G50140	74.3714	1.07116	0.280071	3.82462	0.000130973	0.0018729
AT3G55450	789.894	0.653091	0.170904	3.82138	0.000132706	0.00189649
AT5G38710	335.953	0.984521	0.257715	3.82019	0.00013335	0.00190448
AT2G38250	204.172	1.00132	0.262278	3.81776	0.000134668	0.00191967
AT2G32020	151.03	0.861932	0.225829	3.81675	0.000135222	0.00192617
AT1G59960	702.742	0.61104	0.1601	3.81662	0.000135294	0.00192617
AT1G09480	89.2706	0.984291	0.258109	3.81348	0.000137026	0.00194822
AT5G47580	384.818	0.650632	0.170631	3.81309	0.000137243	0.00194902
AT4G02660	328.48	0.688671	0.180693	3.81128	0.000138251	0.00196088
AT3G54100	909.324	0.698262	0.183301	3.80937	0.00013932	0.0019748
AT1G10585	914.479	1.35376	0.355849	3.80431	0.0001422	0.00201311
AT5G25050	552.912	0.855605	0.224915	3.80413	0.000142305	0.00201333
AT2G46150	116.687	1.02283	0.26901	3.80221	0.000143411	0.00202519
AT2G23320	2776.63	0.824325	0.216843	3.80148	0.000143836	0.00202813
AT2G17710	639.851	0.662863	0.174374	3.80139	0.000143888	0.00202813
AT1G05207	28.9907	1.37014	0.360667	3.7989	0.00014534	0.00204733
AT1G66930	53.6587	1.31142	0.345539	3.79528	0.000147479	0.00207616
AT3G09000	896.306	0.727757	0.191824	3.79388	0.000148313	0.00208661
AT2G40940	3230.91	0.639952	0.168699	3.79346	0.000148562	0.00208881
AT4G21850	1409.25	0.712122	0.187741	3.79312	0.000148768	0.00209042
AT4G07190	26.3495	1.34993	0.356155	3.79028	0.000150478	0.00210993
AT3G13330	3058.68	0.618123	0.163085	3.79019	0.000150529	0.00210993
AT4G05785	9.49839	1.30648	0.345134	3.78544	0.000153437	0.00214538
AT5G37260	736.569	0.774875	0.204735	3.78477	0.00015385	0.00214982
AT3G55600	381.478	0.70369	0.185944	3.78443	0.000154064	0.00215053
AT3G60450	869.776	0.658267	0.173943	3.78438	0.000154091	0.00215053
AT1G09630	695.39	0.654662	0.173062	3.78281	0.000155068	0.00215885
AT4G04800	656.678	0.708067	0.187234	3.78171	0.000155753	0.00216705
AT5G01500	486.207	0.723958	0.191457	3.78132	0.000156001	0.00216917
AT1G64380	85.4009	0.976572	0.258439	3.77873	0.000157631	0.00219048
AT4G19660	1030.38	0.710743	0.188203	3.77646	0.000159073	0.00220918
AT4G02340	633.999	0.590289	0.156326	3.776	0.000159366	0.00221189
AT2G47890	1047.29	0.712958	0.188982	3.77263	0.000161537	0.00224064
AT3G04210	2035.5	0.765493	0.20299	3.77109	0.000162539	0.00225317
AT4G02970	25.1283	1.3572	0.360611	3.76362	0.00016747	0.00231585
AT5G39670	301.341	0.883895	0.235093	3.75977	0.00017007	0.00234893
AT4G00550	569.071	0.624078	0.16615	3.75611	0.000172576	0.00238064
AT5G17390	189.324	1.03986	0.277175	3.75165	0.000175676	0.00241889
AT2G47000	1873.55	0.704724	0.187889	3.75074	0.000176313	0.00242481
AT1G22400	9826.59	1.27403	0.339708	3.75037	0.000176576	0.00242695
AT3G09490	86.9548	1.03871	0.277076	3.74882	0.000177668	0.00244049
AT3G46930	424.142	0.717195	0.191487	3.7454	0.000180109	0.00247102
AT5G13110	1931.92	0.695094	0.185699	3.74311	0.000181754	0.00249208
AT2G27580	829.261	0.67144	0.179517	3.74026	0.000183829	0.00251443
AT1G51660	562.592	0.613757	0.164161	3.73875	0.000184935	0.00252804
AT2G40750	131.211	0.935602	0.250284	3.73816	0.000185373	0.0025325
AT3G51360	69.7592	1.04899	0.280719	3.7368	0.000186378	0.0025447
AT5G52810	411.155	0.780086	0.208829	3.73552	0.000187325	0.00255608
AT5G38310	17.8536	1.34322	0.360045	3.7307	0.000190945	0.00259609
AT3G52561	24.6794	1.28951	0.345687	3.73029	0.000191259	0.0025988
AT3G27330	261.732	0.813091	0.218134	3.72749	0.0001934	0.00262474
AT4G15270	107.809	1.13509	0.304564	3.72694	0.000193816	0.00262568
AT2G24500	3211.8	0.675611	0.181324	3.72599	0.000194553	0.00263409
AT2G33110	181.537	0.765485	0.205581	3.72353	0.000196459	0.00265513
AT3G63420	630.906	0.668089	0.179456	3.72285	0.000196989	0.0026607
AT5G53420	891.864	0.599292	0.161076	3.72056	0.00019878	0.0026833
AT4G12010	505.993	0.644806	0.173447	3.7176	0.000201124	0.00271332
AT1G16130	349.143	0.852664	0.229383	3.71721	0.000201431	0.00271585
AT4G35170	8.8116	1.29251	0.347949	3.71465	0.000203486	0.00274028
AT1G70920	73.1239	1.09602	0.295166	3.71324	0.000204623	0.00275397
AT3G45060	39.2402	1.3367	0.360313	3.70984	0.000207391	0.00278955
AT5G04020	1370.44	0.769239	0.207389	3.70916	0.00020795	0.00279541
AT1G29290	64.0083	1.06685	0.287835	3.70645	0.000210189	0.00282383
AT5G61570	300.733	0.833144	0.224803	3.7061	0.000210472	0.00282597
AT5G02400	228.121	0.739339	0.19961	3.70392	0.00021229	0.00284699
AT4G16960	200.69	0.732128	0.197681	3.70357	0.000212584	0.00284925
AT4G23015	9.60742	1.25727	0.33954	3.70286	0.000213186	0.00285395
AT5G63130	66.1557	1.10075	0.297263	3.70295	0.000213103	0.00285395
AT5G01490	76.189	0.940257	0.254051	3.70106	0.000214702	0.0028693
AT4G11650	1664.89	0.605842	0.163695	3.70105	0.000214713	0.0028693
AT1G30900	653.043	0.751355	0.203025	3.7008	0.000214924	0.00287043
AT3G25760	1419.77	0.847831	0.229106	3.7006	0.000215089	0.00287093
AT1G53950	19.6749	1.31289	0.354852	3.69983	0.00021574	0.00287794
AT2G41090	2846.49	0.635774	0.171895	3.69863	0.000216766	0.00288822
AT1G51670	58.7228	1.17002	0.316607	3.6955	0.000219452	0.00292228
AT3G21780	638.662	1.26847	0.343445	3.69337	0.000221302	0.00294519
AT3G16860	193.278	0.836237	0.226455	3.69273	0.000221856	0.00295083
AT2G03505	126.876	0.996685	0.270331	3.68691	0.000226998	0.00301391
AT5G06570	482.593	1.00665	0.273315	3.68313	0.000230391	0.00305538
AT1G05147	17.9613	1.3274	0.360503	3.68208	0.000231335	0.0030661
AT1G02880	580.811	0.739664	0.200931	3.68119	0.000232147	0.00307507
AT5G54720	448.755	1.03059	0.280073	3.67971	0.000233501	0.00308759
AT2G30670	73.1346	1.16076	0.3155	3.67913	0.000234033	0.00309281
AT5G16080	91.1141	1.10935	0.30168	3.67724	0.000235775	0.00311401
AT5G53990	60.9715	1.20008	0.326382	3.67692	0.000236063	0.0031142
AT5G01180	94.3445	1.00274	0.272701	3.67705	0.000235944	0.0031142
AT1G07893	17.5317	1.32297	0.359987	3.67506	0.000237793	0.0031279
AT1G03905	175.101	0.795282	0.216391	3.67521	0.000237657	0.0031279
AT1G34260	1336.74	0.697403	0.189799	3.67443	0.000238381	0.00313019
AT1G52780	860.443	0.678804	0.184949	3.67021	0.000242348	0.00317675
AT4G27500	11132.6	0.614179	0.167656	3.66334	0.000248952	0.0032539
AT4G34710	30718.8	0.718756	0.196475	3.65826	0.000253936	0.00330759
AT4G06215	20.9664	1.31565	0.359759	3.65702	0.000255165	0.00332169
AT2G04040	2150.68	0.89513	0.244793	3.65668	0.000255507	0.00332423
AT1G13750	168.423	0.850636	0.232792	3.65406	0.00025813	0.00335066
AT5G64300	5879.12	0.720054	0.197267	3.65016	0.00026208	0.00339805
AT3G56200	519.481	0.616236	0.168833	3.64997	0.000262271	0.00339857
AT1G14780	273.704	0.670759	0.183846	3.64849	0.00026379	0.00341434
AT2G46320	592.926	0.591894	0.162257	3.64789	0.000264407	0.00342038
AT3G17700	464.573	0.708928	0.194542	3.6441	0.000268335	0.00346723
AT5G20960	2750.78	0.638947	0.175477	3.64121	0.000271364	0.00350313
AT2G03410	18.7708	1.31031	0.360174	3.638	0.000274765	0.00354425
AT1G68450	41.4413	1.14947	0.315994	3.63762	0.000275171	0.00354747
AT5G44460	84.0248	0.953626	0.262239	3.63647	0.000276399	0.00355748
AT2G20780	864.203	0.712807	0.196054	3.63577	0.000277147	0.00356483
AT4G15070	139.075	0.833609	0.229341	3.6348	0.000278192	0.00357624
AT3G03670	134.634	1.01443	0.279118	3.63441	0.000278615	0.00357964
AT2G44380	817.003	0.813497	0.224	3.63168	0.000281577	0.00361565
AT2G08750	13.0239	1.28131	0.352867	3.63114	0.000282171	0.00362122
AT1G74810	132.766	0.866082	0.238581	3.63015	0.00028326	0.00363314
AT1G02520	437.073	0.732607	0.201898	3.6286	0.000284958	0.00365078
AT1G25275	5848.7	0.652451	0.180207	3.62057	0.000293952	0.00374904
AT1G53633	133.808	0.978195	0.270252	3.61956	0.000295104	0.00376162
AT2G38960	600.812	0.652985	0.18049	3.61784	0.000297072	0.00378245
AT2G09250	9.6263	1.23236	0.341114	3.61276	0.000302961	0.00385526
AT5G45250	1279.23	0.68261	0.189171	3.60842	0.000308064	0.00390922
AT5G22780	1586.64	0.597341	0.165655	3.60594	0.000311027	0.003938
AT1G15890	230.678	0.767883	0.213002	3.60505	0.000312097	0.00394933
AT3G54620	2777.47	0.677793	0.188027	3.60477	0.000312431	0.00395136
AT5G01850	261.481	0.69728	0.193661	3.60052	0.000317582	0.00400755
AT1G79180	36.8757	1.16937	0.325042	3.59758	0.000321196	0.00404865
AT3G28450	1008.04	0.675435	0.187803	3.5965	0.000322524	0.00406026
AT3G44720	1167.06	0.654161	0.181909	3.59608	0.00032305	0.00406072
AT3G20360	26.1486	1.23953	0.344703	3.59592	0.000323245	0.00406091
AT4G26200	289.912	1.29694	0.360752	3.59509	0.000324274	0.00406932
AT3G28480	522.13	0.610621	0.169897	3.59406	0.000325565	0.00408326
AT1G72060	573.001	0.946494	0.263375	3.59371	0.000326001	0.00408647
AT1G18140	81.4442	1.00849	0.280688	3.5929	0.000327016	0.00409693
AT4G18540	9.15486	1.23947	0.345468	3.58778	0.000333503	0.00417128
AT3G48570	457.245	0.649732	0.181127	3.58716	0.0003343	0.00417663
AT4G09570	922.252	0.760983	0.212398	3.58281	0.000339917	0.00424212
AT1G59218	16.4683	1.28146	0.358619	3.57332	0.000352481	0.00438684
AT5G64540	9.48939	1.24297	0.348554	3.56608	0.000362357	0.00449987
AT3G18690	404.366	0.801548	0.224853	3.56476	0.000364185	0.00451761
AT5G07150	89.2271	0.89903	0.252508	3.56041	0.000370281	0.00459072
AT4G16250	1233.04	0.744759	0.209199	3.56006	0.000370772	0.00459429
AT1G09443	13.4013	1.26234	0.354854	3.55735	0.000374621	0.00463691
AT1G17750	178.283	0.909216	0.255686	3.55599	0.000376559	0.00465357
AT2G18860	1126.33	0.607515	0.170844	3.55597	0.000376583	0.00465357
AT3G17240	3645.35	0.624646	0.175716	3.55485	0.000378192	0.00466581
AT1G23300	18.7304	1.27747	0.35954	3.55307	0.000380756	0.00468978
AT5G55560	105.264	0.918553	0.25859	3.55216	0.000382084	0.00470102
AT1G73280	109.255	0.863745	0.243444	3.54802	0.000388135	0.0047632
AT2G23170	383.041	0.785143	0.221403	3.54622	0.000390806	0.00478772
AT5G47740	137.533	0.806205	0.227362	3.5459	0.000391273	0.00478807
AT3G55730	269.778	0.646488	0.182473	3.54293	0.000395711	0.00483977
AT5G66640	78.175	0.990343	0.279582	3.54223	0.000396764	0.00484741
AT3G50470	126.681	0.878468	0.248073	3.54117	0.000398351	0.00486418
AT3G03475	26.6474	1.26221	0.356578	3.53978	0.000400461	0.00488644
AT1G15670	2016.68	0.750508	0.212194	3.5369	0.000404856	0.00492767
AT5G13750	2871.11	0.770417	0.218083	3.53268	0.000411373	0.0049909
AT5G03730	5920.49	0.785606	0.223204	3.51967	0.000432079	0.00521696
AT4G22590	891.95	0.681913	0.193868	3.5174	0.000435801	0.0052563
AT3G11320	548.846	0.623116	0.17736	3.51328	0.000442619	0.00532718
AT3G56260	92.8298	0.937852	0.267202	3.5099	0.000448281	0.00538388
AT4G27730	694.809	0.711977	0.202857	3.50976	0.00044852	0.0053839
AT5G40170	1330.06	0.653434	0.186306	3.50732	0.000452647	0.00542853
AT5G25180	16.648	1.26388	0.360396	3.50691	0.000453335	0.00543306
AT4G36140	1254.62	0.600361	0.171307	3.5046	0.000457295	0.00546606
AT5G41180	522.7	0.667542	0.19058	3.5027	0.000460572	0.00549526
AT1G01120	2078.09	0.682286	0.19503	3.49837	0.000468116	0.00557774
AT1G74680	406.395	0.619815	0.177245	3.49693	0.000470641	0.005599
AT3G02360	5091.76	0.609624	0.174668	3.49018	0.000482702	0.00572445
AT5G02430	159.392	0.781367	0.224535	3.47993	0.000501547	0.00592003
AT1G09560	2233.82	0.767161	0.220557	3.47828	0.000504635	0.00595338
AT5G50210	2784.47	0.771841	0.22203	3.47628	0.000508416	0.00599486
AT1G14642	43.008	1.13406	0.326427	3.47416	0.000512463	0.00603943
AT5G20820	57.0547	0.985642	0.283861	3.47227	0.000516067	0.00607875
AT1G05043	9.08821	1.19634	0.344565	3.47205	0.000516505	0.00608074
AT1G29195	66.79	1.11023	0.319883	3.47073	0.000519049	0.00610752
AT4G03480	24.7247	1.19752	0.345134	3.46972	0.000520999	0.0061241
AT4G04335	8.23631	1.0814	0.31188	3.46735	0.000525624	0.00616886
AT4G12350	20.6423	1.24516	0.359683	3.46182	0.000536538	0.00627111
AT1G61280	93.0228	1.01423	0.292978	3.46181	0.000536551	0.00627111
AT3G53770	4.95092	1.0721	0.310003	3.45834	0.000543524	0.006333
AT5G63880	596.449	0.625449	0.180873	3.45795	0.000544307	0.00633561
AT3G13380	500.014	0.643508	0.186206	3.45589	0.000548469	0.00638078
AT1G15530	1041.52	0.715707	0.207242	3.45348	0.000553411	0.00643167
AT4G37290	29.5802	1.23992	0.359107	3.4528	0.000554805	0.00643795
AT1G68765	14.3474	1.21352	0.351733	3.45013	0.000560322	0.00649532
AT1G07130	136.324	0.754908	0.218862	3.44923	0.00056218	0.00651352
AT2G02860	860.172	0.67496	0.195779	3.44757	0.000565659	0.00653712
AT3G13090	80.6247	1.01732	0.295333	3.44467	0.000571751	0.00659406
AT5G62480	207.733	0.69968	0.20321	3.44315	0.000574988	0.00662802
AT2G27390	5.51693	1.15406	0.335393	3.44092	0.000579746	0.00667946
AT1G29300	368.336	0.77363	0.225091	3.43696	0.000588272	0.00677081
AT3G23190	379.238	0.678048	0.197393	3.43501	0.000592525	0.00680592
AT5G58750	325.07	0.761457	0.221793	3.43319	0.000596526	0.00684841
AT2G04430	178.239	0.713727	0.208382	3.42508	0.000614607	0.00704171
AT3G03660	75.1591	0.958314	0.280067	3.42173	0.000622235	0.0071219
AT3G62590	185.602	0.87928	0.256988	3.42148	0.00062281	0.00712488
AT3G52520	83.2611	0.978238	0.285964	3.42084	0.000624274	0.00713443
AT5G49700	920.398	0.845211	0.247141	3.41996	0.000626307	0.00715044
AT5G40540	194.087	0.761745	0.223107	3.41426	0.000639556	0.00726508
AT5G58390	408.053	0.647176	0.189609	3.41322	0.000641999	0.00727824
AT4G26220	170.247	0.786471	0.23055	3.41128	0.000646576	0.00731914
AT3G04420	164.251	0.821134	0.240726	3.41107	0.000647094	0.00732135
AT3G14850	156.214	0.83266	0.244201	3.40973	0.000650282	0.00735373
AT3G48860	1432.85	0.620766	0.182071	3.40948	0.000650874	0.00735676
AT5G25110	191.726	0.850619	0.249532	3.40886	0.000652345	0.0073697
AT1G66780	25.5943	1.20939	0.355032	3.40642	0.000658209	0.00741377
AT5G59550	971.598	0.625087	0.183687	3.40301	0.000666476	0.0074957
AT2G36470	161.021	0.716123	0.210502	3.40198	0.000669005	0.00751668
AT4G24240	979.553	0.617931	0.181676	3.40128	0.000670711	0.00753211
AT5G47230	660.869	0.94237	0.277267	3.39878	0.000676871	0.00758625
AT4G19700	700.414	0.645019	0.189995	3.39493	0.000686458	0.00768609
AT3G52430	559.624	0.614792	0.181131	3.39418	0.000688331	0.00769945
AT1G51840	188.637	0.851696	0.251036	3.39272	0.000692024	0.00773312
AT4G21865	86.9844	0.946658	0.27912	3.39158	0.000694914	0.00776159
AT5G44582	124.815	0.865066	0.25512	3.39083	0.000696822	0.00777523
AT4G03585	32.9947	1.21512	0.358421	3.3902	0.000698411	0.0077853
AT2G13650	462.569	0.609675	0.179966	3.38773	0.000704727	0.00785183
AT5G48390	41.0694	1.10886	0.327595	3.38486	0.000712139	0.00791494
AT3G61280	31.9224	1.17098	0.346114	3.38321	0.000716437	0.00795102
AT2G18350	256.716	0.641161	0.189584	3.38194	0.000719766	0.00798405
AT1G11300	141.658	0.79731	0.235811	3.38114	0.000721868	0.00800345
AT5G01340	539.754	0.773937	0.229085	3.37838	0.00072914	0.00808011
AT3G13433	8.46697	1.18202	0.350859	3.36893	0.000754599	0.00832153
AT1G20900	653.142	0.6929	0.206048	3.3628	0.000771559	0.00847966
AT1G74870	76.206	1.06292	0.316261	3.3609	0.000776876	0.00852982
AT1G75170	674.66	0.654581	0.194781	3.36061	0.000777717	0.00853079
AT2G25440	19.9407	1.21123	0.360531	3.35959	0.000780586	0.00855811
AT5G44430	28.5111	1.20436	0.358555	3.35894	0.000782423	0.0085741
AT5G22540	12.284	1.17706	0.350462	3.35858	0.000783431	0.00857685
AT1G73080	1977.77	0.837897	0.24955	3.35763	0.000786138	0.00859139
AT2G28400	368.807	0.800835	0.23859	3.35653	0.000789261	0.00861569
AT2G30140	2964.47	0.841354	0.251068	3.3511	0.000804906	0.00876113
AT3G23150	996.801	0.838437	0.25048	3.34732	0.000815965	0.00887298
AT1G53700	73.4064	0.97666	0.291912	3.34574	0.000820628	0.00891513
AT4G01740	132.37	0.822971	0.245973	3.34578	0.000820518	0.00891513
AT4G17070	1283.16	0.785774	0.235294	3.33954	0.000839175	0.00910352
AT1G08477	25.847	1.19142	0.356849	3.33871	0.00084167	0.00912258
AT3G48450	76.0702	1.07928	0.323323	3.33809	0.000843568	0.00913805
AT4G19870	336.575	0.651855	0.195297	3.33777	0.000844546	0.00914427
AT1G17420	489.184	0.884964	0.265389	3.3346	0.000854227	0.00923144
AT2G38470	4578.33	0.734082	0.220191	3.33385	0.000856544	0.00925206
AT1G06153	10.2026	1.166	0.350029	3.33115	0.00086487	0.00933309
AT2G18000	45.676	1.02454	0.307745	3.32918	0.00087103	0.00937278
AT1G29060	224.025	0.745878	0.224083	3.32858	0.000872894	0.00938838
AT1G02220	306.276	0.80114	0.240747	3.32773	0.000875574	0.00941274
AT3G14470	301.792	0.613397	0.184447	3.3256	0.000882297	0.00947152
AT1G54575	239.402	0.799796	0.240651	3.32347	0.000889047	0.00953946
AT1G12211	6.75914	1.08935	0.327882	3.32237	0.000892555	0.00956804
AT2G25260	222.073	0.729874	0.219876	3.31948	0.000901846	0.009644
AT2G40330	1146.01	0.590789	0.177982	3.31937	0.000902195	0.009644
AT2G29480	210.701	0.808744	0.24396	3.31507	0.000916197	0.00976601
AT3G23260	64.5544	0.916975	0.276668	3.31435	0.000918567	0.00978207
AT4G31860	3630.66	0.79421	0.239652	3.31401	0.00091967	0.00978922
AT2G29950	32.1083	1.14267	0.344911	3.31293	0.000923233	0.00981792
AT4G23050	1425.52	0.699392	0.211172	3.31196	0.000926458	0.00984283
AT5G05400	184.357	0.699384	0.211299	3.30992	0.000933213	0.00990544
AT1G63930	70.9853	0.986956	0.298214	3.30956	0.000934422	0.00991363
AT5G41800	514.786	0.58798	0.177845	3.30614	0.000945909	0.0100167
AT1G63440	632.334	0.804659	0.243509	3.30443	0.000951701	0.0100686
AT5G49850	103.778	0.885669	0.268125	3.3032	0.000955892	0.0101083
AT3G47550	880.236	0.649026	0.196617	3.30097	0.000963524	0.0101842
AT1G04833	11.1866	1.11858	0.339106	3.29862	0.000971622	0.0102521
AT3G07800	447.492	0.640721	0.194355	3.29665	0.000978444	0.010313
AT4G05010	182.899	0.661982	0.200894	3.29518	0.0009836	0.0103481
AT5G63790	7495.7	0.78408	0.238264	3.2908	0.00099902	0.0104992
AT3G03540	5.89491	1.00945	0.307068	3.28739	0.00101122	0.0106012
AT1G61255	29.1081	1.15151	0.350362	3.28664	0.00101392	0.0106141
AT1G50740	494.963	0.691658	0.210448	3.2866	0.00101403	0.0106141
AT5G22350	1821.4	0.624459	0.190244	3.28242	0.0010292	0.010748
AT2G35658	40.4559	1.10705	0.337325	3.28185	0.00103127	0.0107597
AT3G50160	10.7609	1.15235	0.351475	3.27861	0.0010432	0.0108692
AT3G46190	24.8457	1.15709	0.353087	3.27707	0.00104891	0.0109186
AT5G13190	898.357	0.676852	0.207136	3.26767	0.00108437	0.011236
AT5G15120	78.3417	0.989313	0.302825	3.26695	0.00108713	0.0112595
AT3G49630	43.0816	1.02517	0.314429	3.2604	0.00111254	0.0114807
AT5G19440	3244.53	0.662405	0.203271	3.25873	0.00111911	0.0115328
AT2G44480	117.884	0.740205	0.22728	3.25679	0.00112678	0.0116013
AT1G30320	1183.33	0.702453	0.215874	3.254	0.00113793	0.0117053
AT4G33040	73.3999	0.911588	0.280355	3.25155	0.00114779	0.0117907
AT4G26070	294.18	0.620127	0.190886	3.24868	0.00115942	0.0118833
AT2G31585	189.602	0.734851	0.226328	3.24683	0.00116697	0.0119499
AT1G19025	138.136	0.862111	0.265542	3.24662	0.00116786	0.01195
AT2G30040	711.426	0.6264	0.192942	3.24657	0.00116804	0.01195
AT3G04320	133.946	0.770747	0.237626	3.24353	0.00118059	0.0120566
AT2G38490	24.3581	1.13336	0.349494	3.24285	0.0011834	0.0120733
AT2G36330	285.603	0.66025	0.2036	3.24288	0.00118329	0.0120733
AT4G19720	95.6394	1.02181	0.315173	3.24207	0.00118663	0.0120965
AT1G49570	393.298	1.16136	0.358279	3.2415	0.00118903	0.0121154
AT1G65040	1278.67	0.593468	0.183112	3.24101	0.00119106	0.0121254
AT2G41342	21.0953	1.13969	0.351805	3.23956	0.00119714	0.0121708
AT3G46660	738.589	1.14864	0.354669	3.23864	0.00120103	0.0122048
AT3G26230	343.311	0.709305	0.219602	3.22996	0.00123808	0.0125139
AT1G05773	4.52563	0.978304	0.303028	3.22843	0.00124474	0.01257
AT5G06395	24.5867	1.16427	0.360673	3.22805	0.00124635	0.0125807
AT3G54120	105.245	0.801596	0.248384	3.22724	0.0012499	0.0126109
AT1G21230	38.2694	1.06259	0.329843	3.22151	0.00127516	0.0128429
AT5G47960	133.432	0.703937	0.218628	3.21979	0.00128285	0.0128974
AT4G37409	41.6563	1.15809	0.359847	3.21828	0.00128961	0.012955
AT2G24600	809.473	0.701909	0.218102	3.21826	0.00128973	0.012955
AT4G09225	8.65524	1.10193	0.342606	3.21631	0.00129848	0.0130372
AT4G16957	329.247	0.603273	0.187636	3.21513	0.00130385	0.0130853
AT1G61440	31.7448	1.12311	0.349891	3.20989	0.00132786	0.0132831
AT5G64572	148.105	0.99286	0.309578	3.20714	0.00134062	0.0133832
AT3G53280	720.812	0.651207	0.203192	3.20488	0.00135119	0.0134804
AT5G58350	2598.21	0.632325	0.197305	3.2048	0.00135155	0.0134804
AT5G43190	872.545	0.620526	0.193719	3.20324	0.00135892	0.0135405
AT5G54850	187.111	0.660092	0.206347	3.19894	0.00137933	0.0137092
AT4G15130	704.125	0.613457	0.191818	3.19812	0.00138326	0.0137329
AT1G63860	565.59	0.722074	0.226014	3.19482	0.00139918	0.0138518
AT1G67148	66.1626	0.997759	0.312454	3.1933	0.00140655	0.0139065
AT5G42092	29.3318	1.1497	0.360218	3.19168	0.00141447	0.0139726
AT1G04837	10.0188	1.12437	0.352473	3.18995	0.00142297	0.0140443
AT5G05880	237.829	0.619332	0.194236	3.18856	0.00142982	0.0140935
AT3G22370	2886.54	0.668145	0.209559	3.18833	0.00143096	0.0140986
AT2G39030	47.448	1.13012	0.354791	3.18532	0.00144592	0.0142274
AT5G22680	6.59825	1.07286	0.336869	3.18481	0.00144849	0.0142465
AT1G52270	109.782	0.840059	0.264139	3.18036	0.0014709	0.0144231
AT5G65925	250.105	0.648336	0.20396	3.17873	0.00147921	0.014492
AT5G44090	3063.51	0.640757	0.201665	3.17733	0.00148639	0.0145468
AT3G25780	295.873	0.709545	0.22346	3.17526	0.00149701	0.0146284
AT4G20970	24.3658	1.12988	0.35668	3.16778	0.00153609	0.0149716
AT5G15870	1107.41	0.672698	0.212539	3.16506	0.00155051	0.0150927
AT1G11310	3963.39	0.58853	0.185967	3.1647	0.00155244	0.0151003
AT1G72120	231.569	0.830171	0.262392	3.16385	0.00155694	0.0151358
AT1G07260	336.797	0.688705	0.217826	3.16172	0.00156841	0.0152342
AT2G31751	150.068	0.726928	0.229926	3.16157	0.00156921	0.0152354
AT4G17650	894.495	0.602807	0.190698	3.16106	0.00157197	0.0152491
AT3G19613	4.67384	0.959477	0.303909	3.15712	0.00159337	0.0154434
AT1G18860	139.555	0.725372	0.229866	3.15563	0.00160154	0.0155028
AT3G24540	21.3439	1.1185	0.354521	3.15496	0.00160518	0.0155247
AT1G14130	655.726	0.672664	0.213285	3.15383	0.00161143	0.0155587
AT1G65481	34.8288	1.07963	0.342483	3.15236	0.00161957	0.0156172
AT4G39940	2133.89	1.08869	0.345497	3.15108	0.0016267	0.0156793
AT2G30395	50.0858	0.940489	0.298544	3.15025	0.0016313	0.0157103
AT1G58410	204.826	0.686308	0.217981	3.14847	0.00164125	0.0157994
AT4G20110	1209.57	0.62008	0.197354	3.14196	0.0016782	0.0161208
AT1G62305	266.108	0.769085	0.244941	3.13988	0.00169016	0.016222
AT1G19310	534.196	0.66871	0.213046	3.13881	0.00169636	0.0162681
AT5G18360	127.05	0.754727	0.24114	3.12983	0.00174909	0.0167097
AT5G05850	321.675	0.704026	0.225026	3.12864	0.00175618	0.0167703
AT1G20780	1981.56	0.670631	0.214753	3.1228	0.00179138	0.0170776
AT1G50180	235.877	0.697555	0.223811	3.11672	0.00182877	0.0173384
AT1G60095	77.3405	0.868386	0.279473	3.10723	0.0018885	0.0178087
AT3G01990	103.717	0.820133	0.263976	3.10685	0.00189093	0.0178242
AT2G17500	2177.01	0.626479	0.201681	3.10629	0.00189449	0.0178503
AT1G78130	283.513	0.605023	0.194825	3.10547	0.0018998	0.0178854
AT3G09480	83.8448	0.838666	0.27009	3.10514	0.00190189	0.0178977
AT2G32190	188.684	0.94365	0.304794	3.09602	0.00196135	0.0184114
AT4G09420	130.366	0.771461	0.24927	3.09489	0.0019689	0.0184592
AT4G05395	7.17947	1.01211	0.327054	3.09462	0.00197063	0.0184641
AT5G37670	63.1093	0.884942	0.286023	3.09396	0.00197506	0.0184641
AT1G31885	133.245	0.776809	0.251039	3.09437	0.00197228	0.0184642
AT5G52760	81.5635	1.00015	0.323477	3.09187	0.00198899	0.0185631
AT3G62280	108.192	0.810687	0.262264	3.09111	0.00199411	0.0186032
AT1G71140	362.713	0.694794	0.225151	3.08591	0.00202934	0.0188697
AT2G08420	51.8837	1.09034	0.353572	3.08379	0.00204383	0.0189888
AT5G66480	285.329	0.688372	0.223244	3.0835	0.00204579	0.0189992
AT4G30390	424.553	0.710904	0.230669	3.08193	0.00205667	0.0190734
AT4G21500	84.5507	0.862486	0.280128	3.0789	0.0020777	0.0192482
AT5G66070	483.197	0.65516	0.212807	3.07866	0.00207935	0.0192556
AT2G14560	74.0358	0.972769	0.3162	3.07644	0.0020949	0.0193759
AT5G64310	910.95	0.736277	0.239473	3.07457	0.00210805	0.0194737
AT2G41230	533.044	1.07206	0.348749	3.07402	0.00211194	0.0195017
AT5G38250	6.91083	1.04336	0.339513	3.07312	0.00211835	0.0195529
AT2G08440	7.38208	0.994986	0.32389	3.07198	0.00212642	0.0196114
AT5G59895	5.99558	0.991548	0.322817	3.07155	0.0021295	0.0196318
AT4G19920	34.633	0.978305	0.3187	3.06967	0.00214297	0.0197238
AT1G47560	87.3653	0.835211	0.272135	3.0691	0.00214703	0.0197532
AT1G53330	54.2857	0.925603	0.301738	3.06757	0.00215807	0.0198467
AT4G01350	191.001	0.722641	0.23566	3.06645	0.00216618	0.0198904
AT3G07365	6.34466	1.01124	0.330558	3.05919	0.00221933	0.0202784
AT5G54140	201.501	0.605201	0.197972	3.057	0.00223566	0.0203864
AT5G57910	572.24	0.737938	0.241802	3.05182	0.00227455	0.0207161
AT1G23840	36.5424	0.969224	0.317695	3.0508	0.00228233	0.0207695
AT5G13700	98.6129	0.971994	0.319142	3.04565	0.00232177	0.021053
AT5G22890	180.53	0.723994	0.237766	3.04499	0.00232692	0.0210913
AT1G04477	3.63413	0.873373	0.286901	3.04416	0.00233328	0.021132
AT1G26255	9.99868	1.07516	0.35321	3.04397	0.00233475	0.0211368
AT3G10930	120.284	0.932224	0.306278	3.04371	0.00233678	0.0211466
AT4G03430	3539.82	0.643952	0.211661	3.04237	0.00234724	0.0212076
AT4G36150	360.771	0.59017	0.194053	3.04128	0.00235575	0.021259
AT3G14710	19.1843	1.08344	0.356394	3.04001	0.0023657	0.0213403
AT2G26290	70.7971	0.829779	0.273136	3.03797	0.00238179	0.0214598
AT1G06573	43.92	1.07596	0.355177	3.02936	0.0024507	0.0220019
AT4G03320	289.918	0.645102	0.21312	3.02694	0.00247044	0.0221527
AT2G44600	130.101	0.693884	0.22932	3.02583	0.00247955	0.0222257
AT2G29430	7.69314	1.00617	0.332637	3.02483	0.00248775	0.0222816
AT5G36970	10.9664	1.06859	0.353376	3.02395	0.00249497	0.0223197
AT3G02455	13.2184	1.06607	0.35278	3.02193	0.00251169	0.0224427
AT3G48080	128.97	0.754769	0.249934	3.01988	0.00252874	0.0225773
AT2G08780	17.3661	1.08641	0.359837	3.01919	0.00253456	0.0226203
AT2G25737	437.308	0.596914	0.197768	3.01825	0.00254239	0.0226723
AT5G26660	78.7092	0.829698	0.275317	3.01361	0.00258159	0.0229947
AT3G50460	87.0551	0.763342	0.253963	3.00572	0.00264952	0.0234896
AT2G29330	225.488	0.615972	0.205081	3.00355	0.00266852	0.0236389
AT3G20410	2841.67	0.654194	0.217939	3.00174	0.00268446	0.0237615
AT1G16300	472.006	0.638586	0.212986	2.99825	0.00271532	0.0239972
AT1G09363	4.55044	0.860557	0.287071	2.99771	0.00272014	0.0240304
AT3G04070	430.336	0.64978	0.216835	2.99666	0.00272958	0.0240856
AT3G03535	13.7489	1.0636	0.355221	2.9942	0.00275164	0.0242098
AT5G15845	122.331	0.69505	0.232284	2.99225	0.00276934	0.0243322
AT4G01360	97.1191	0.98073	0.328033	2.98973	0.00279225	0.0245144
AT4G18990	19.2076	1.06545	0.356608	2.98773	0.00281053	0.0246367
AT1G70690	287.66	0.632048	0.211566	2.98748	0.0028129	0.0246385
AT2G34390	9.23777	1.05309	0.353084	2.98253	0.00285873	0.0250012
AT5G04340	1433.28	1.04942	0.35209	2.98054	0.00287743	0.0251453
AT5G51680	74.2691	0.857403	0.287845	2.9787	0.00289474	0.0252868
AT4G01920	116.736	0.69091	0.23211	2.97664	0.00291422	0.0254178
AT1G51645	167.149	0.68865	0.231596	2.97349	0.0029443	0.0256406
AT3G49845	90.8941	0.879426	0.295885	2.97219	0.00295683	0.0257201
AT4G06665	13.6605	1.07098	0.360372	2.97186	0.00295999	0.0257301
AT4G09695	5.80345	0.955113	0.321437	2.97139	0.0029646	0.0257482
AT3G18915	21.4571	1.0398	0.35011	2.96992	0.00297874	0.0258512
AT4G15310	12.7324	1.06977	0.360385	2.9684	0.00299358	0.02597
AT2G46160	95.2127	0.737863	0.248824	2.9654	0.00302292	0.0261743
AT2G33130	6.27596	0.955537	0.322273	2.96499	0.00302693	0.0261929
AT4G34135	6005.44	0.715897	0.241454	2.96494	0.00302738	0.0261929
AT2G08665	845.619	1.06316	0.358666	2.96421	0.00303462	0.0262456
AT5G39770	6.9257	0.939317	0.317443	2.95901	0.00308634	0.026561
AT1G18300	703.809	0.636635	0.215477	2.95454	0.00313138	0.0269078
AT3G22240	419.023	0.822395	0.278543	2.95249	0.00315227	0.027077
AT4G36490	7.11709	1.00662	0.34098	2.95214	0.0031558	0.0270971
AT3G05370	548.344	0.695968	0.235874	2.95059	0.00317163	0.0272021
AT1G66500	275.933	0.775317	0.263192	2.94582	0.003221	0.0275524
AT3G08870	77.1481	0.889668	0.302134	2.94461	0.00323363	0.0276299
AT3G59150	239.289	0.622935	0.211578	2.94423	0.00323761	0.0276528
AT2G35000	91.8623	0.80723	0.274628	2.93936	0.00328893	0.0280382
AT3G50760	85.8443	0.78915	0.268537	2.9387	0.00329592	0.0280822
AT5G52670	69.778	0.998971	0.340097	2.93731	0.00331076	0.0281771
AT4G22070	59.0223	0.938155	0.319425	2.93701	0.00331393	0.0281771
AT5G64230	654.47	0.774792	0.263989	2.93493	0.00333618	0.0283098
AT3G45660	32.9735	0.985223	0.335745	2.93444	0.00334154	0.0283257
AT4G16600	36.2008	0.973035	0.331712	2.93337	0.00335303	0.0283923
AT5G01210	4514.89	0.710331	0.242146	2.93348	0.00335184	0.0283923
AT3G49780	2049.93	0.601716	0.205186	2.93254	0.00336207	0.028437
AT1G64561	59.3774	0.846921	0.289138	2.92913	0.00339917	0.0286545
AT1G77380	648.79	0.761563	0.260169	2.92719	0.00342041	0.02878
AT3G13432	23.8076	1.02356	0.350092	2.92368	0.00345919	0.0290631
AT1G19180	2141.87	0.747031	0.255611	2.92254	0.00347194	0.0291173
AT5G13330	773.288	0.765617	0.262141	2.92063	0.00349327	0.0292625
AT1G04083	5.66312	0.889918	0.304987	2.91789	0.0035241	0.0294748
AT3G23175	305.304	0.650045	0.222909	2.91619	0.00354331	0.0296051
AT1G60750	29.7642	1.02262	0.351215	2.91165	0.00359523	0.0299837
AT1G77920	389.353	0.638849	0.21941	2.91167	0.00359503	0.0299837
AT1G09927	57.0858	0.997357	0.342622	2.91095	0.00360328	0.0300176
AT2G01920	5.85653	0.944129	0.324562	2.90893	0.00362665	0.030179
AT2G36270	68.0677	0.85886	0.295242	2.90901	0.0036258	0.030179
AT5G48770	36.5151	0.945089	0.325287	2.9054	0.00366787	0.0304214
AT4G23140	12.0375	1.03721	0.3571	2.90453	0.00367802	0.0304902
AT4G15480	70.5233	0.918274	0.316203	2.90406	0.00368354	0.0305179
AT4G40070	248.105	0.714548	0.24611	2.90337	0.00369171	0.0305632
AT3G11570	44.7369	0.877762	0.302363	2.90301	0.00369599	0.0305875
AT1G79110	384.292	0.597744	0.205943	2.90248	0.00370223	0.0306279
AT1G17250	42.7922	0.932433	0.321306	2.90201	0.00370779	0.0306515
AT1G63530	87.3189	0.866382	0.299107	2.89656	0.00377282	0.0310757
AT5G46050	265.532	0.719755	0.248607	2.89515	0.00378976	0.0312039
AT1G06540	57.9616	1.02959	0.355768	2.894	0.00380369	0.0312958
AT1G63245	28.4219	0.987679	0.341423	2.89284	0.00381781	0.0313799
AT2G40715	20.8728	1.00666	0.34855	2.88814	0.00387523	0.031769
AT4G24340	211.963	0.74422	0.257799	2.88683	0.00389149	0.0318908
AT5G13910	75.0535	0.824378	0.285622	2.88625	0.00389857	0.0319372
AT5G66620	136.487	0.652685	0.226172	2.88579	0.00390431	0.0319727
AT1G02430	44.2012	0.957971	0.332108	2.88452	0.00392014	0.0320653
AT3G59750	67.7512	0.915817	0.317677	2.88286	0.00394089	0.0321676
AT4G04135	38.3142	1.03984	0.360812	2.88195	0.00395227	0.0322488
AT3G03025	24.9736	1.03842	0.360404	2.88127	0.0039607	0.032306
AT1G08930	13470.7	0.602898	0.209826	2.87332	0.00406188	0.0329745
AT3G07520	191.879	0.614785	0.214186	2.87033	0.00410046	0.0332187
AT1G04980	804.385	0.658898	0.229597	2.8698	0.00410729	0.0332622
AT3G55240	531.672	0.602474	0.210104	2.8675	0.00413722	0.0333852
AT5G25350	7563.89	0.585782	0.20438	2.86615	0.00415502	0.0335025
AT1G31540	1958.5	0.599121	0.209221	2.86358	0.00418889	0.0336941
AT4G35480	176.754	0.798435	0.278847	2.86334	0.00419197	0.0337069
AT5G12010	1494.96	0.599483	0.209452	2.86215	0.00420776	0.0338099
AT5G41761	119.343	0.791043	0.276734	2.85849	0.00425657	0.0341415
AT2G25125	14.4804	0.989186	0.346155	2.85764	0.00426805	0.0341755
AT3G48020	38.7699	0.98225	0.34397	2.85562	0.00429522	0.0343541
AT5G64250	4500.24	0.670496	0.234795	2.85567	0.00429461	0.0343541
AT4G08925	3.47736	0.709717	0.248596	2.8549	0.00430502	0.0344204
AT3G19700	7.2374	0.942094	0.330233	2.85281	0.00433342	0.0346108
AT5G57920	28.6091	0.960514	0.336831	2.85162	0.00434972	0.0346799
AT1G55673	130.22	1.02806	0.360756	2.84975	0.00437541	0.0348356
AT3G16510	125.489	0.695956	0.244288	2.84892	0.0043868	0.0348712
AT5G01215	124.706	0.761195	0.268465	2.83536	0.00457737	0.0361892
AT1G69840	2216.53	0.587524	0.207411	2.83266	0.00461619	0.0364198
AT5G10695	328.105	0.640497	0.226163	2.83201	0.00462564	0.0364691
AT1G13340	252.987	0.59587	0.210577	2.8297	0.00465914	0.0366565
AT4G12480	2473.78	0.693359	0.245158	2.82822	0.00468079	0.0367631
AT5G18340	52.8618	0.83432	0.295204	2.82625	0.0047096	0.0368998
AT1G55850	10652.6	0.69244	0.245177	2.82425	0.00473914	0.0370671
AT3G01515	7.38104	0.925319	0.327768	2.82309	0.00475626	0.0371753
AT2G27200	414.943	0.669808	0.237907	2.81542	0.00487135	0.0379309
AT1G72545	24.8379	0.986074	0.350278	2.81512	0.00487598	0.0379406
AT3G09985	15.5846	0.980742	0.348553	2.81375	0.00489673	0.0380501
AT1G15385	25.392	0.970186	0.345472	2.80829	0.00498048	0.0386081
AT1G08727	4.02092	0.766592	0.27305	2.80751	0.00499256	0.0386885
AT1G30730	2039.69	0.922337	0.329012	2.80335	0.00505742	0.0390442
AT3G09275	47.128	0.998594	0.356484	2.80123	0.00509086	0.0392354
AT1G30860	199.969	0.75107	0.268471	2.79758	0.00514868	0.0396137
AT5G05220	10.1131	0.992435	0.3548	2.79717	0.00515528	0.039651
AT4G10720	20.3946	0.993894	0.35594	2.79231	0.00523336	0.0401246
AT4G05200	219.383	0.706472	0.253013	2.79223	0.00523457	0.0401246
AT1G07603	3.17405	0.70479	0.252502	2.79123	0.00525087	0.0402359
AT3G08785	14.5722	0.956546	0.343368	2.78578	0.00533994	0.0407942
AT2G44010	130.631	0.693836	0.249216	2.78407	0.00536806	0.0409677
AT1G33790	1437.4	0.689342	0.247829	2.78152	0.00541046	0.0412495
AT4G25560	30.7756	0.982128	0.353148	2.78107	0.005418	0.0412583
AT3G61680	167.161	0.620362	0.22312	2.7804	0.00542922	0.041323
AT5G39110	13.6903	0.999029	0.359531	2.7787	0.00545774	0.0414704
AT3G44400	304.284	0.680289	0.245531	2.77069	0.00559381	0.0423017
AT3G09875	4.35675	0.780554	0.281797	2.76992	0.00560698	0.0423628
AT2G07875	10.7674	0.959232	0.346679	2.76692	0.00565885	0.0426551
AT4G22640	19.7833	0.997819	0.360708	2.76628	0.00567004	0.0427112
AT5G07285	7.41457	0.917406	0.332332	2.76051	0.00577107	0.0432979
AT3G57760	340.298	0.633941	0.22965	2.76047	0.00577182	0.0432979
AT1G29690	1203.77	0.701573	0.254165	2.76031	0.00577471	0.0432979
AT5G45220	115.067	0.69205	0.250873	2.75857	0.0058055	0.0434281
AT5G52720	25.7225	0.980587	0.355524	2.75814	0.00581308	0.0434561
AT5G36220	524.115	0.679546	0.246465	2.75717	0.00583036	0.0435422
AT3G46670	1259.58	0.606761	0.220162	2.75598	0.00585164	0.043658
AT5G60630	41.9729	0.902794	0.327667	2.75522	0.00586535	0.0437314
AT1G02460	70.3841	0.807331	0.293483	2.75086	0.00594395	0.0442447
AT5G23000	47.6468	0.846743	0.307998	2.74918	0.00597448	0.0443698
AT5G10760	22.1533	0.979278	0.356708	2.74532	0.00604519	0.0447921
AT5G08820	14.7033	0.989104	0.360463	2.74398	0.00606994	0.0449021
AT3G04475	5.81151	0.862323	0.314365	2.74306	0.00608693	0.044969
AT2G34000	57.1455	0.786379	0.286804	2.74187	0.00610899	0.0450879
AT5G09720	44.2357	0.84794	0.309892	2.73625	0.00621445	0.0457173
AT5G46370	9.6707	0.976988	0.357419	2.73346	0.00626736	0.0460049
AT1G80450	110.05	0.680029	0.249138	2.72953	0.00634246	0.0464598
AT1G09794	95.9741	0.703868	0.258097	2.72714	0.00638851	0.0466794
AT5G03990	292.21	0.585602	0.21536	2.71918	0.00654448	0.0476068
AT5G17380	8927.12	0.895501	0.329577	2.71712	0.00658532	0.0478402
AT1G64563	97.0737	0.729151	0.268598	2.71466	0.00663447	0.0481194
AT3G07315	101.061	0.790712	0.291431	2.7132	0.00666365	0.0483003
AT5G22550	37.0549	0.868265	0.320035	2.71303	0.00666713	0.04831
AT3G23123	5.1399	0.833446	0.30729	2.71224	0.00668297	0.0483939
AT1G44010	11.5164	0.970394	0.357834	2.71186	0.00669075	0.0484347
AT5G27520	539.539	0.603388	0.222829	2.70786	0.00677194	0.0489755
AT3G01485	6.41769	0.890532	0.329126	2.70575	0.0068151	0.0492562
AT3G04690	6.12737	0.914145	0.337877	2.70556	0.00681901	0.0492669
AT5G38240	53.762	0.768021	0.284378	2.7007	0.00691938	0.0498349
AT1G03070	40.4476	0.888464	0.330137	2.6912	0.00711957	0.0510495
AT3G26820	13.0539	0.960255	0.357112	2.68895	0.00716778	0.0513302
AT2G18210	91.9919	0.694577	0.258477	2.6872	0.00720543	0.0515346
AT1G61230	13.2417	0.968509	0.360576	2.686	0.00723125	0.0516704
AT3G28007	51.8656	0.830133	0.309417	2.68289	0.00729886	0.0520386
AT4G26950	53.3443	0.924643	0.344842	2.68136	0.00733243	0.052245
AT3G46260	5.86407	0.909167	0.339282	2.67967	0.00736938	0.0524274
AT3G22410	98.2222	0.73738	0.275201	2.67942	0.00737495	0.052449
AT1G07607	5.1092	0.784222	0.2929	2.67744	0.00741869	0.0526773
AT5G52740	5.43639	0.838449	0.31318	2.67721	0.00742381	0.0526972
AT2G39435	119.769	0.625916	0.234082	2.67392	0.00749707	0.0531007
AT1G61610	59.2254	0.885666	0.331464	2.67198	0.00754052	0.0533418
AT1G11185	241.886	0.809981	0.30381	2.66608	0.0076741	0.054084
AT4G34810	107.397	0.72132	0.270591	2.66573	0.00768226	0.0541247
AT3G14620	1470.91	0.608243	0.228412	2.66292	0.00774665	0.0544767
AT5G49620	33.4153	0.895073	0.336709	2.6583	0.00785367	0.0550413
AT4G02380	16162.5	0.595892	0.224201	2.65785	0.00786409	0.0550973
AT3G08665	2.85274	0.700214	0.263603	2.65632	0.00789985	0.0552784
AT1G23170	288.756	0.600287	0.225993	2.65622	0.00790215	0.0552784
AT1G09193	15.4843	0.957669	0.360572	2.65597	0.007908	0.0553023
AT1G21320	123.463	0.713318	0.268667	2.65503	0.00793018	0.0554232
AT2G09420	8.47225	0.896878	0.338253	2.6515	0.00801356	0.055868
AT5G41610	136.609	0.601878	0.22711	2.65016	0.00804532	0.0560033
AT5G09970	29.9755	0.899975	0.340172	2.64565	0.00815338	0.0565758
AT5G24070	110.332	0.733947	0.27742	2.64561	0.00815425	0.0565758
AT2G09225	6.40324	0.815042	0.30809	2.64547	0.00815783	0.0565777
AT5G22555	45.9811	0.879747	0.332989	2.64197	0.00824259	0.0571132
AT1G65850	42.5672	0.841048	0.318546	2.64027	0.00828396	0.0573472
AT5G57500	57.9557	0.780084	0.295449	2.64033	0.00828241	0.0573472
AT4G25390	982.846	0.631418	0.239555	2.6358	0.00839391	0.0580374
AT2G14750	1992.38	0.605241	0.229836	2.63336	0.00845448	0.0584126
AT2G27310	664.482	0.666602	0.253159	2.63314	0.00846004	0.0584233
AT1G65730	218.573	0.643901	0.245051	2.62762	0.00859851	0.0591811
AT1G23550	289.771	0.60986	0.232175	2.62672	0.00862125	0.0592475
AT2G34360	16.7865	0.943958	0.359646	2.62469	0.00867288	0.059496
AT4G31960	6.4238	0.878744	0.335356	2.62033	0.00878449	0.0600415
AT4G07205	18.9045	0.939265	0.358539	2.61971	0.00880057	0.0601333
AT1G80130	104.942	0.728743	0.278298	2.61857	0.00883002	0.0602981
AT5G64810	109.874	0.702801	0.268465	2.61785	0.00884863	0.0603888
AT1G65484	13.672	0.932866	0.356704	2.61524	0.0089166	0.0607428
AT2G32030	142.451	0.659744	0.252312	2.6148	0.00892809	0.0607845
AT5G37485	19.9228	0.929067	0.355779	2.61136	0.00901841	0.0613007
AT2G08435	6.59781	0.854886	0.327701	2.60874	0.00908767	0.0617226
AT5G44420	117.946	0.822562	0.315363	2.6083	0.00909921	0.0617824
AT5G45080	210.64	0.585001	0.224435	2.60655	0.00914608	0.0620119
AT3G50190	62.3769	0.756147	0.291233	2.59637	0.00942158	0.0636469
AT1G56130	104.602	0.672754	0.259686	2.59064	0.00957969	0.0644907
AT1G07430	14.5915	0.933633	0.360605	2.58908	0.0096234	0.0647593
AT1G04433	10.4988	0.926978	0.358108	2.58854	0.00963827	0.0648245
AT4G25719	7.32161	0.855006	0.330521	2.58684	0.00968594	0.0650642
AT1G29860	8.56538	0.899563	0.347773	2.58664	0.00969169	0.0650835
AT5G41910	123.43	0.669165	0.259281	2.58085	0.00985571	0.0660869
AT4G36808	53.3436	0.841789	0.32659	2.57751	0.00995156	0.0666508
AT1G66390	14.6437	0.92822	0.360451	2.57516	0.0100193	0.067045
AT5G64000	127.167	0.588734	0.228652	2.57481	0.0100296	0.0670543
AT4G21440	14.3607	0.926929	0.360609	2.57046	0.0101564	0.0677225
AT1G05213	9.50322	0.869515	0.338311	2.57017	0.010165	0.0677597
AT3G62150	4290.85	0.591913	0.230371	2.56939	0.0101878	0.067892
AT5G09030	4.24769	0.764684	0.298024	2.56585	0.0102924	0.0684677
AT2G32140	63.4107	0.764619	0.297976	2.56604	0.0102866	0.0684677
AT1G76690	2191.74	0.607305	0.236925	2.56329	0.0103687	0.0688944
AT1G56300	268.73	0.621231	0.242513	2.56165	0.0104177	0.0691594
AT2G09975	9.98489	0.877685	0.343167	2.5576	0.0105396	0.0698047
AT4G36010	123.004	0.628164	0.245707	2.55656	0.0105714	0.0699746
AT4G15396	78.5575	0.693262	0.271726	2.55132	0.0107315	0.0707034
AT3G46668	100.978	0.610393	0.239391	2.54978	0.0107791	0.070935
AT4G12090	73.7724	0.733497	0.288058	2.54635	0.0108856	0.0714903
AT3G58380	8.18191	0.892452	0.351085	2.54198	0.0110226	0.0722639
AT5G44380	4615	0.837956	0.329947	2.53967	0.0110957	0.0725967
AT4G16350	56.5705	0.797471	0.314168	2.53836	0.0111373	0.0727947
AT5G38550	121.654	0.607368	0.240125	2.52939	0.0114262	0.0742656
AT3G13080	4781.57	0.591473	0.233851	2.52927	0.01143	0.0742687
AT1G74385	6.53284	0.833772	0.330477	2.52293	0.0116381	0.0752539
AT1G12940	23.6903	0.881995	0.349783	2.52155	0.0116841	0.075465
AT3G25882	71.269	0.675706	0.268062	2.52071	0.0117118	0.0756012
AT4G09130	3.83244	0.719109	0.285837	2.5158	0.0118763	0.076315
AT5G41860	40.3968	0.809371	0.322001	2.51357	0.0119516	0.076603
AT5G48190	9.3067	0.897273	0.357499	2.50986	0.0120778	0.0773027
AT4G01630	45.3426	0.852023	0.339815	2.50731	0.0121653	0.0777384
AT3G13276	13.2343	0.899275	0.358836	2.50609	0.0122076	0.0779574
AT3G02105	4.78394	0.771731	0.307964	2.50591	0.0122136	0.0779734
AT1G05680	3934.74	0.835924	0.333707	2.50496	0.0122464	0.0781167
AT1G67470	329.895	0.586363	0.234167	2.50404	0.0122785	0.0782779
AT1G08543	4.57344	0.765656	0.305892	2.50303	0.0123136	0.0784131
AT5G59070	35.049	0.798095	0.31992	2.49467	0.0126075	0.079784
AT2G26380	17.7971	0.899265	0.360499	2.4945	0.0126134	0.079784
AT2G37555	13.6843	0.898903	0.360531	2.49328	0.012657	0.0799706
ATMG00070	106.448	0.592846	0.238263	2.4882	0.0128393	0.0809188
AT1G76480	12.0917	0.89447	0.360397	2.4819	0.0130683	0.0820199
AT4G22495	12.1252	0.868942	0.350291	2.48063	0.013115	0.0822217
AT5G03985	5.04259	0.783449	0.316099	2.4785	0.0131938	0.0824731
AT1G58340	378.492	0.638399	0.257802	2.47632	0.0132746	0.0828449
AT1G15580	16.6211	0.888708	0.358991	2.47557	0.0133024	0.0829832
AT4G36060	130.926	0.678411	0.274164	2.47447	0.0133435	0.0831481
AT3G56470	76.2375	0.653131	0.264283	2.47133	0.013461	0.0837231
AT3G57970	4.76843	0.695033	0.281876	2.46574	0.0136733	0.0848761
AT4G32870	524.604	0.652445	0.265155	2.46062	0.0138696	0.0858648
AT2G47485	282.157	0.587091	0.239248	2.4539	0.0141316	0.0871481
AT4G14640	37.6891	0.786645	0.320663	2.45318	0.0141599	0.0872749
AT4G22475	29.4261	0.878254	0.358094	2.45258	0.0141835	0.0873732
AT4G12720	2609.61	0.610337	0.249024	2.45092	0.0142491	0.0876819
AT3G48920	32.3605	0.880758	0.359414	2.45054	0.0142642	0.0877272
AT3G15300	79.3399	0.661056	0.270051	2.44789	0.0143694	0.0882781
AT5G40460	67.9197	0.713365	0.291717	2.4454	0.0144691	0.0886498
AT2G25410	34.5685	0.810551	0.331972	2.44162	0.0146215	0.0893661
AT5G66630	104.526	0.666069	0.272923	2.4405	0.0146669	0.0895953
AT5G60285	10.8595	0.862516	0.353832	2.43764	0.0147835	0.0900647
AT3G05390	107.321	0.638301	0.261907	2.43712	0.0148046	0.0900965
AT2G09510	3.65672	0.70958	0.291798	2.43175	0.0150262	0.0912244
AT2G31945	195.946	0.622591	0.256094	2.4311	0.015053	0.0913138
AT2G08650	120.232	0.630161	0.259303	2.43021	0.0150901	0.0914616
AT3G13500	7.01716	0.824012	0.339412	2.42776	0.0151923	0.0918446
AT2G18010	9.46353	0.854322	0.352164	2.42592	0.0152697	0.0921348
AT2G32470	4.45056	0.702128	0.289462	2.42563	0.0152818	0.0921835
AT5G54960	2095.6	0.61033	0.252462	2.41751	0.015627	0.0935667
AT1G04537	3.21028	0.641009	0.265156	2.41748	0.0156284	0.0935667
AT5G22300	2942.28	0.806376	0.333842	2.41544	0.0157161	0.0937941
AT5G27100	76.3103	0.670298	0.277642	2.41425	0.0157677	0.093988
AT2G46940	71.902	0.672745	0.27884	2.41266	0.0158368	0.0943252
AT1G65250	93.4696	0.599035	0.248396	2.41162	0.015882	0.0944564
AT5G53486	112.818	0.682453	0.28297	2.41175	0.0158761	0.0944564
AT2G39375	105.361	0.603373	0.250712	2.40664	0.0160999	0.0955659
AT2G20030	17.2583	0.858193	0.358601	2.39317	0.0167036	0.0984527
AT2G38240	128.286	0.805713	0.33681	2.39219	0.0167481	0.0986123
AT4G34139	17.767	0.853967	0.357035	2.39183	0.0167646	0.098658
AT4G36670	2239.5	0.613303	0.256407	2.39191	0.0167608	0.098658
AT5G67160	110.212	0.588928	0.24652	2.38896	0.0168961	0.0992512
AT1G73965	18.7695	0.844271	0.354532	2.38136	0.0172486	0.100851
AT5G44210	134.445	0.620639	0.260675	2.38089	0.0172707	0.100903
AT2G43580	3.78881	0.719228	0.302278	2.37936	0.0173426	0.101218
AT1G09297	19.6882	0.854014	0.360732	2.36745	0.0179114	0.103683
AT5G02895	46.1326	0.73919	0.312484	2.36553	0.0180044	0.104088
AT5G02750	106.642	0.601051	0.254235	2.36415	0.0180713	0.104293
AT2G01200	13.1727	0.85225	0.360599	2.36343	0.0181067	0.104386
AT5G67488	75.1585	0.685469	0.290892	2.35644	0.0184512	0.105914
AT4G17660	7.69447	0.79021	0.33555	2.35497	0.0185243	0.106206
AT5G41025	26.9964	0.826076	0.351608	2.34942	0.0188025	0.107441
AT2G40113	183.375	0.61341	0.261101	2.34932	0.0188075	0.107442
AT3G56790	10.2635	0.831937	0.354229	2.34859	0.0188448	0.107601
AT2G46740	307.107	0.589932	0.251334	2.34721	0.0189147	0.107891
AT3G10815	83.0847	0.693264	0.295455	2.34643	0.0189544	0.108036
AT1G52890	193.71	0.684955	0.292392	2.34259	0.0191503	0.109098
AT3G62780	22.4846	0.818264	0.34989	2.33863	0.0193544	0.109929
AT1G08847	6.71296	0.750368	0.320989	2.33767	0.0194041	0.110153
AT5G01835	4.03845	0.670749	0.287654	2.33179	0.0197117	0.111344
AT1G53801	10.5943	0.803708	0.345	2.32959	0.019828	0.111861
AT5G44578	68.6222	0.636213	0.273578	2.32553	0.0200439	0.112742
AT1G61290	12.5664	0.820222	0.352895	2.32427	0.0201111	0.11298
AT1G63580	66.8099	0.716791	0.308477	2.32365	0.0201445	0.113084
AT4G28340	8.60709	0.813257	0.350333	2.32138	0.0202663	0.113514
[truncated: 24,210 more rows]
