# Supplementary material for: Immunity onset alters plant chromatin and utilizes EDA16 to regulate oxidative homeostasis
Source: PLoS Pathog. 2021 May 20;17(5):e1009572. doi: 10.1371/journal.ppat.1009572 (PMC8171942; doi:10.1371/journal.ppat.1009572)
Supplement: S13 Dataset — (XLSX) [file ppat.1009572.s023.xlsx]

## Sheet: Dataset S13
Dataset S13. flg22-differentially expressed genes in the 3 genotypes Two-week-old seedlings flg22- and mock-treated for 2 hours. RNA-seq data analysed with DEseq2. Yellow: induced genes. Blue: repressed genes (adjusted p-value < 0.05, fold-change > 1.5). Data was only inluded when p-value < 0.05. Gene was only included when gold-change > 1.5 for at least one of the genotypes.
Gene	Col0	eda16-∆Hc	eda16-OE
AT1G01010	0.605705
AT1G01120	0.811399	0.60735	0.682286
AT1G01340	1.34356	1.18738	1.14564
AT1G01380			-0.766048
AT1G01430	-0.635461	-0.421118	-0.745894
AT1G01460	1.36584	1.13668	1.3662
AT1G01480	2.3936	1.99015	2.45792
AT1G01540	-0.63564	-0.393064	-0.391794
AT1G01560	3.12215	2.2896	2.57088
AT1G01580		-0.843862
AT1G02170	0.94572	0.813089	0.915339
AT1G02220	0.935744		0.80114
AT1G02230	1.5757	0.901962	2.07859
AT1G02340	-0.576442	-0.72639	-0.497508
AT1G02350		-0.637398
AT1G02360	3.66393	2.93159	3.44933
AT1G02390	0.751801
AT1G02400	1.99835	1.731	1.59749
AT1G02430	1.13557	1.03292	0.957971
AT1G02440	1.83972	1.64763	1.85857
AT1G02450	1.98261	1.55286	1.52845
AT1G02460	1.12488	0.835187	0.807331
AT1G02520	0.802856		0.732607
AT1G02580		0.798131
AT1G02610	-0.753665	-0.900287	-0.674768
AT1G02620	-1.35134	-0.909231	-0.737355
AT1G02660	-0.694823		-0.855268
AT1G02705	-0.750436
AT1G02820	-1.04018	-0.761437	-1.52546
AT1G02880	1.00864	0.842724	0.739664
AT1G02900	0.788955	0.49554	0.843514
AT1G02920	4.51592	3.76146	4.17048
AT1G02930	4.72794	4.12902	4.23179
AT1G03055			-0.863048
AT1G03070	0.780619	1.06601	0.888464
AT1G03220	1.751	1.41591	1.40701
AT1G03230	1.39023	1.17054	1.33251
AT1G03370	1.5579	1.27589	1.21324
AT1G03457	-0.609247	-0.474986	-0.678
AT1G03470	-0.633	-0.612655	-0.627763
AT1G03610	-0.5356	-0.522876	-0.65007
AT1G03740	1.22404	1.02235	1.05796
AT1G03820		-0.598458
AT1G03905	1.26531	0.916544	0.795282
AT1G03980		0.694038
AT1G04000	0.723766	0.504543	0.549471
AT1G04083			0.889918
AT1G04100	1.10439	0.71028	0.919634
AT1G04133	-0.766022		-0.724213
AT1G04343			0.606519
AT1G04370	2.71203	2.37648	2.31886
AT1G04433			0.926978
AT1G04463	-0.776952
AT1G04477			0.873373
AT1G04487			0.680834
AT1G04503			0.771442
AT1G04537			0.641009
AT1G04680	-0.569468	-0.690659	-0.517397
AT1G04737			0.623911
AT1G04760		-0.611467
AT1G04833			1.11858
AT1G04837		0.878873	1.12437
AT1G04980	1.00026	0.75041	0.658898
AT1G05010	0.603179	0.648476
AT1G05043			1.19634
AT1G05147	1.01985		1.3274
AT1G05170	0.603037	0.599089	0.419215
AT1G05207			1.37014
AT1G05213			0.869515
AT1G05280		-0.826672
AT1G05300	2.01515	2.1248	2.0726
AT1G05340	0.740531	0.497902
AT1G05347	1.01711		1.44257
AT1G05530	-0.988615	-0.857546	-0.798156
AT1G05575	2.51269	1.9052	1.46478
AT1G05650	1.22301	0.726579
AT1G05670	1.7916	1.19351	1.33588
AT1G05675	3.2767	2.6116	2.50776
AT1G05680	1.2275	0.877721	0.835924
AT1G05700	1.30072	1.02271	1.43431
AT1G05773			0.978304
AT1G05777			0.700008
AT1G06100	-0.826638
AT1G06120	-0.87157	-1.04992	-1.10335
AT1G06135	1.38905	1.63393	1.76725
AT1G06148	0.770508	0.891238
AT1G06153	1.43201	1.46576	1.166
AT1G06160	0.730004	0.804975
AT1G06350		-0.668492
AT1G06360	-0.886914	-0.813448	-0.745165
AT1G06460	-0.616443	-0.496058	-0.740014
AT1G06520	-0.541959		-0.768128
AT1G06540			1.02959
AT1G06573			1.07596
AT1G06620	1.01351	0.959172
AT1G06800	1.04117	0.847657	0.951238
AT1G06830	0.588512
AT1G06840	0.931293	0.741986	0.87155
AT1G06983	2.52815	2.20456	2.30399
AT1G07000	2.21777	1.98401	1.80952
AT1G07090	0.89915	0.62646	0.779104
AT1G07110	-0.55047	-0.433574	-0.645218
AT1G07128	1.48138	1.44939	1.46762
AT1G07130	0.496213	0.636863	0.754908
AT1G07135	0.902933	0.994127
AT1G07160	4.91801	4.71846	4.34472
AT1G07240	1.27851	1.01435	1.10976
AT1G07260	0.558789	0.537503	0.688705
AT1G07280	-0.667408	-0.335778	-0.528612
AT1G07350	0.981399	0.844266	0.908353
AT1G07390	0.699679	0.45871	0.446395
AT1G07400	2.69559	1.99043	2.23875
AT1G07430	0.980389		0.933633
AT1G07490	-0.623423
AT1G07603			0.70479
AT1G07607			0.784222
AT1G07620	2.18201	1.73207	1.82686
AT1G07630	1.50632	1.19301	1.31726
AT1G07650	0.592103	0.480967	0.307696
AT1G07690	0.710557	0.84157	0.738539
AT1G07693			0.691555
AT1G07885	1.22416	1.12034
AT1G07890	0.930891	0.853742	0.727062
AT1G07893			1.32297
AT1G08050	2.63804	2.2861	2.34842
AT1G08250	0.552627	0.789158	0.371023
AT1G08315	0.580921	0.615908	0.436758
AT1G08450	0.735348	0.699813	0.605013
AT1G08477			1.19142
AT1G08500	-0.685044	-0.587876
AT1G08543			0.765656
AT1G08550	-0.709664	-0.524186	-0.578606
AT1G08590		-0.74157
AT1G08657			0.593933
AT1G08727			0.766592
AT1G08847			0.750368
AT1G08860			0.724833
AT1G08920	-0.558258	-0.492455	-0.669506
AT1G08930	0.900759	0.856054	0.602898
AT1G08940	1.65231	1.65273	1.66326
AT1G08973	0.681528	0.911548
AT1G08990		-0.719243
AT1G09053			0.773232
AT1G09080	2.29116	1.92851	2.00314
AT1G09193			0.957669
AT1G09230	-0.634758		-0.671493
AT1G09240	-1.47888	-1.00263	-1.75548
AT1G09253	1.48774	1.00653	1.65768
AT1G09297	0.993093	0.886889	0.854014
AT1G09363			0.860557
AT1G09415	-0.366791		-0.635436
AT1G09443	1.23877	1.29004	1.26234
AT1G09480	0.984764	0.913298	0.984291
AT1G09560	1.02766	0.643245	0.767161
AT1G09600			-0.65722
AT1G09630	0.786403	0.719007	0.654662
AT1G09750	-0.655523	-0.456048	-0.694933
AT1G09794	0.827733		0.703868
AT1G09913	2.04366	1.52618	1.86196
AT1G09927			0.997357
AT1G09930	0.739615	0.770389
AT1G09932	2.60602	2.28615	2.40983
AT1G09940	0.964794	0.997062	0.908072
AT1G09970	1.24238	1.1416	1.07239
AT1G10020	-0.650722	-0.455779	-0.498922
AT1G10040	1.33143	0.866032	1.32849
AT1G10050	0.871245	0.746743	0.706781
AT1G10155			0.644816
AT1G10170	0.746372	0.463953	0.519541
AT1G10410	0.861054	0.697743	0.747047
AT1G10417	1.64128	1.33737	1.53266
AT1G10550	-0.69805	-0.838983
AT1G10580	0.680922	0.563295	0.44224
AT1G10585	1.6848	1.4499	1.35376
AT1G10640	-0.703709	-0.859193	-0.861415
AT1G10700	0.841596	0.674464	0.642766
AT1G10990	1.67553	1.33478	1.33739
AT1G11050	0.705779	0.739588
AT1G11100	1.8705	1.32304	1.60663
AT1G11185	0.965552	0.77398	0.809981
AT1G11200	1.20888	1.03999	1.08819
AT1G11300	0.796303	0.731972	0.79731
AT1G11310	0.663163	0.570593	0.58853
AT1G11330	0.9758	0.848383	0.781275
AT1G11540	1.10605	0.698228	0.964735
AT1G11545	-0.704403	-0.718896	-0.428076
AT1G11572	0.635089
AT1G11600	-0.746387	-0.869522	-0.791722
AT1G11735		-0.689655
AT1G11740	-0.781147		-0.658946
AT1G11920			0.732764
AT1G11925	2.86471	2.24471	1.87412
AT1G12030	0.760268	0.894703	0.712687
AT1G12090	-0.619872		-0.610279
AT1G12200	1.22174	0.8582	1.20118
AT1G12210	1.34799	1.01241	1.34189
AT1G12211			1.08935
AT1G12240	-1.02332	-0.764918	-1.19303
AT1G12480		0.588242	0.506333
AT1G12750	0.502179	0.598613	0.38186
AT1G12760	0.586375	0.542475	0.451346
AT1G12805		-0.61947
AT1G12940	1.55612	1.25264	0.881995
AT1G13100	0.624943		0.472638
AT1G13110	1.54416	1.10721	1.34176
AT1G13210	1.44723	1.41007	1.26553
AT1G13340	0.901097	0.477612	0.59587
AT1G13430		-0.738216
AT1G13470	1.90382	1.65316	1.36523
AT1G13480	2.25681	1.59849	2.03975
AT1G13490	0.953146	0.749639
AT1G13510	0.993402
AT1G13520	2.55998	1.74184	2.1029
AT1G13530	0.636412		0.513124
AT1G13540	1.45501	1.04886	1.50561
AT1G13550	2.40205	2.07751	2.72149
AT1G13700	-1.13196	-0.920208	-1.14003
AT1G13750		0.476746	0.850636
AT1G13970		-0.576506	-0.590666
AT1G14000	0.628664	0.425552	0.425458
AT1G14010	0.716357	0.470524	0.48834
AT1G14040	1.25042	0.832277	1.07697
AT1G14130	0.753626	0.482491	0.672664
AT1G14150	-0.643427	-0.433694	-0.521076
AT1G14170	1.25853	0.847085	1.38729
AT1G14190	-0.588038
AT1G14200	1.58787	1.29272	1.17453
AT1G14220	0.718232
AT1G14260	1.20392	0.925122	1.27994
AT1G14330	0.607941	0.428783	0.415533
AT1G14345	-0.604733	-0.503606	-0.768648
AT1G14360	1.2789	1.30926	1.16257
AT1G14370	1.74096	1.38083	1.27991
AT1G14420			0.796804
AT1G14520	-0.940809	-1.16077	-0.602631
AT1G14540	4.53047	4.59173	4.30883
AT1G14550	5.28106	4.48695	4.89773
AT1G14640	2.22069	2.01684	1.81708
AT1G14642	1.56741	1.43808	1.13406
AT1G14780	0.63924	0.534189	0.670759
AT1G14870	2.12389	1.66725	1.89657
AT1G14880		0.711587	0.666625
AT1G15125	1.53173	1.62154	1.37316
AT1G15210	-0.435233	-0.593165
AT1G15290	-0.492027	-0.343712	-0.614789
AT1G15385	0.792114	0.883909	0.970186
AT1G15415	2.5337	2.38544	2.20004
AT1G15430	1.57913	1.37293	1.26685
AT1G15520	2.33515	2.02562	2.04707
AT1G15530	0.908405	0.892619	0.715707
AT1G15540	1.1476	1.24247	0.708456
AT1G15580	1.04999		0.888708
AT1G15625	1.97319	1.72561	2.55296
AT1G15670	0.77601	0.809773	0.750508
AT1G15790	0.746035	0.620418
AT1G15830	-0.714178	-0.482944	-0.445634
AT1G15890	1.12603	0.70501	0.767883
AT1G16030	2.65755	1.87849	1.9303
AT1G16090	1.03767	1.28219	1.36924
AT1G16110	1.42295	1.40455	1.29335
AT1G16130	0.975225	1.02773	0.852664
AT1G16150	2.82697	2.16926	2.73512
AT1G16160	2.27601	2.141	2.50842
AT1G16170	-0.621604	-0.51978	-0.605706
AT1G16300	0.780285	0.574156	0.638586
AT1G16370			0.597905
AT1G16420	2.58432	2.51265	1.95977
AT1G16540	0.926163	0.815633	0.746943
AT1G16640	0.638826		0.631572
AT1G16670	1.05206	0.955755	0.964108
AT1G16720	-0.639005	-0.420934	-0.642263
AT1G16730			-0.761857
AT1G17147	1.9529	1.66007	1.35465
AT1G17170	1.33492	0.990591	1.14329
AT1G17180	2.25307	1.64263	1.90672
AT1G17190	-0.685392	-0.808993	-0.7226
AT1G17220	-0.605712	-0.474525	-0.672321
AT1G17240	1.64273	1.42108	1.23928
AT1G17250	1.11988	0.767612	0.932433
AT1G17285			0.738106
AT1G17290	1.0332	0.877852	0.732925
AT1G17330	1.02749	1.18541	1.02769
AT1G17420	1.27809	0.727752	0.884964
AT1G17620	-0.760136	-0.527154	-0.569011
AT1G17744	1.53052	1.24602	1.62333
AT1G17745	1.45802	1.15399	1.25799
AT1G17750	1.09471	1.10184	0.909216
AT1G17860	1.60559	1.29262	1.2924
AT1G17870	0.613178
AT1G17890	0.591331	0.414828	0.601207
AT1G17970	-0.670348	-0.701651	-0.768704
AT1G18140	1.75958	1.23328	1.00849
AT1G18210	1.27233	1.04561	1.22121
AT1G18265	-0.81288		-0.578466
AT1G18300	0.727245	1.09996	0.636635
AT1G18350	0.729392	0.929221
AT1G18382	0.883112	0.831705	0.822985
AT1G18390	1.92569	1.87762	1.72725
AT1G18570	2.33585	2.00676	1.81651
AT1G18590	0.614181
AT1G18735			0.790058
AT1G18860	1.15568		0.725372
AT1G18870			-0.700371
AT1G18890	1.06657	0.76574	0.845963
AT1G18980	0.805876
AT1G19020	2.76593	2.3938	2.39002
AT1G19025	1.08845	1.26728	0.862111
AT1G19050	-0.591945	-0.849784	-0.746748
AT1G19130	0.903376	0.850377	0.793767
AT1G19180	1.27821	1.13776	0.747031
AT1G19250	0.907032		0.726586
AT1G19310	0.880115	0.815261	0.66871
AT1G19320	1.64008	1.21943	1.3541
AT1G19330		-0.599895
AT1G19360	0.915233	0.638871	0.754712
AT1G19380	1.82459	1.79821	1.35646
AT1G19610		0.64973
AT1G19640	0.641481
AT1G19670	0.934573	1.07628	0.453389
AT1G19900	-0.842306	-0.922531	-1.08396
AT1G20080		-0.710769
AT1G20310	1.88363	1.25692	1.49617
AT1G20450	-0.469581	-0.609712	-0.48418
AT1G20780	0.921704	0.691868	0.670631
AT1G20900	0.601569	0.509725	0.6929
AT1G21010	1.30373	0.968494	0.954012
AT1G21050	0.710892	0.745494	0.522352
AT1G21100	1.59675	1.1646	1.46773
AT1G21110	3.10023	2.506	2.96723
AT1G21120	4.27233	3.76886	3.84829
AT1G21130	1.10125	0.94141	0.789975
AT1G21210	0.805699		0.560068
AT1G21230	1.33117	0.750087	1.06259
AT1G21240	1.56175	1.61685	1.51255
AT1G21250	1.33981	1.4626	1.1589
AT1G21310	0.779877	0.375462	0.696966
AT1G21313	0.778311		1.7156
AT1G21320	1.15517	1.61291	0.713318
AT1G21326	0.814059
AT1G21380	0.654293	0.459452	0.538671
AT1G21520	0.64119
AT1G21550	1.78495	1.13315	1.5027
AT1G21600	-0.605099	-0.489693	-0.567567
AT1G21900	0.686001	0.660686	0.628588
AT1G21910	-1.25933	-0.834695	-1.14748
AT1G22070	0.643465	0.541873	0.581369
AT1G22150			-1.04121
AT1G22180	1.10132	0.681896	1.02858
AT1G22280	1.23697	1.03232	1.00113
AT1G22330	-0.633511	-0.783087	-0.52528
AT1G22370	-1.05268	-0.768538	-0.746872
AT1G22380	-1.27474	-0.827361	-1.54288
AT1G22400	1.5687	1.39031	1.27403
AT1G22403		0.59676
AT1G22410	0.952077	0.722923	0.713379
AT1G22490	-1.1688	-0.787886	-0.855971
AT1G22500	-0.907932	-0.885857	-0.73684
AT1G22530	-0.806776	-0.74428	-0.835896
AT1G22550	-0.915118	-0.800478	-0.769885
AT1G22570	-0.590536	-0.513482	-0.755678
AT1G22630	-0.64988	-0.463852	-0.721214
AT1G22740	-0.857888	-0.652201	-0.811777
AT1G22810	4.06878	3.76125	3.22527
AT1G22880	-0.733181	-0.741792
AT1G22890	0.851708	0.779133	0.726247
AT1G22900	1.37712	1.33775	1.22136
AT1G22990	-0.807129
AT1G23010		-0.621795
AT1G23030	-0.765801	-0.645701	-0.566736
AT1G23050			-0.5908
AT1G23090	0.829774	0.81217	0.706874
AT1G23160		-0.629864
AT1G23170	0.759725	0.715762	0.600287
AT1G23300			1.27747
AT1G23390	-0.698066		-0.436973
AT1G23400	-0.726383	-0.543804	-0.621844
AT1G23450	1.2417	1.03885	1.20735
AT1G23460	0.640948	0.529586
AT1G23550	0.968526	1.02382	0.60986
AT1G23560	1.26586	0.949426	1.00555
AT1G23710	0.498623	0.666811
AT1G23720	0.696886		0.530647
AT1G23830	0.692498	0.76141
AT1G23840	1.18636		0.969224
AT1G23850	0.65881	0.749795	0.484431
AT1G24100	0.591961
AT1G24140	2.2492	2.50504	1.95852
AT1G24145	1.47511	1.73806	1.19609
AT1G24147		0.616219
AT1G24148	-0.603057	-0.420776	-0.466575
AT1G24150	1.30061	1.05892	1.16832
AT1G24160	-0.664235	-0.569792	-0.624566
AT1G24170	-0.532587	-0.586418	-0.505849
AT1G24485		-0.933336
AT1G24600	1.22494	1.27818	0.747084
AT1G25220	2.20814	1.81437	2.03009
AT1G25275	0.909447	0.830083	0.652451
AT1G25277	0.603813
AT1G25370	1.90045	1.67904	1.39407
AT1G25390	1.53392	1.26303	1.27303
AT1G25460	0.743631
AT1G26240	1.82138	1.22485	1.4559
AT1G26250	1.17901	0.650244	0.844342
AT1G26255			1.07516
AT1G26380	6.16489	5.28077	5.77694
AT1G26410	4.54271	3.55869	4.06451
AT1G26420	5.1905	4.27599	4.82574
AT1G26600			-0.701094
AT1G26690	0.809015	0.602134	0.667613
AT1G26730	1.11333	0.755661	0.547102
AT1G26900	0.689925		0.460592
AT1G27020	1.9169	1.83782	1.63043
AT1G27130	1.07286	0.909017	0.953708
AT1G27140	-1.34108	-0.928029
AT1G27330	1.45267	1.03924	1.00637
AT1G27350	1.14345	0.836295	0.877302
AT1G27620			0.598145
AT1G27720	2.21268	1.79757	1.64272
AT1G27730		0.772529
AT1G27760	0.826178	0.629422	0.629723
AT1G28010	0.693466	0.776538	0.561413
AT1G28190	2.37853	2.09237	2.09505
AT1G28260	-0.590932	-0.481664	-0.772394
AT1G28360			0.725769
AT1G28370	0.855331	1.302	1.19813
AT1G28380	1.18448	1.04171	0.825069
AT1G28390	0.867392	0.822937	0.911192
AT1G28480	3.32863	2.49584	2.53195
AT1G28530			-0.593796
AT1G28680	0.880816	0.555123	0.706599
AT1G29025	-0.838603	-0.957263
AT1G29060	0.76462	0.654089	0.745878
AT1G29120	0.69506	0.83248	0.675939
AT1G29195	1.27237	0.801079	1.11023
AT1G29290	1.4534	1.14685	1.06685
AT1G29300	0.803736	0.809313	0.77363
AT1G29310	0.612254	0.536934	0.535798
AT1G29357	0.618413	0.403868	0.433474
AT1G29395	-0.810618		-0.669775
AT1G29640	0.802202	0.471407	1.05417
AT1G29670	1.0963	1.00087	0.978566
AT1G29690	1.11139	0.801345	0.701573
AT1G29700	-0.439808	-0.333775	-0.62165
AT1G29860	0.738136		0.899563
AT1G30070	1.14932	0.785688	0.819973
AT1G30135	0.786632	0.893301
AT1G30280		-0.726233	-0.472803
AT1G30320	0.861337	0.804154	0.702453
AT1G30370	1.98588	1.65067	1.89987
AT1G30420	2.0374	1.80145	1.89167
AT1G30560			0.682949
AT1G30570	-0.597896	-0.430016	-0.437542
AT1G30620	1.66875	1.36942	1.40568
AT1G30690	-0.408119	-0.598703
AT1G30700	2.7791	2.14598	2.52432
AT1G30720	0.964577	0.787713	0.793717
AT1G30730	1.0382	0.786048	0.922337
AT1G30755	2.53362	2.18569	2.28781
AT1G30757	2.50474	2.30906	2.25203
AT1G30760	0.648349		0.46447
AT1G30780	0.783224	0.682863
AT1G30860			0.75107
AT1G30900	0.86491	0.612412	0.751355
AT1G31130	0.629249	0.443648	0.399875
AT1G31290			-0.879007
AT1G31310	-0.759685		-0.64924
AT1G31320	-0.697823	-0.650674
AT1G31540	0.836012	0.548514	0.599121
AT1G31750	-0.757862
AT1G31820	-0.639236		-0.730336
AT1G31885	0.885869		0.776809
AT1G31930	0.921534	0.869466	0.809812
AT1G31950	-0.673791	-0.630713	-0.550486
AT1G32127	0.762364	0.620723	0.546331
AT1G32170	0.631012	0.428002	0.427378
AT1G32350	2.98431	2.85139	2.66566
AT1G32870	0.589896	0.417757
AT1G32910		1.02512
AT1G32928	0.438992	0.790304
AT1G32940	2.00206	1.54203	1.85189
AT1G32950	1.34142	1.26997	1.31684
AT1G32960	3.21293	2.5345	2.67315
AT1G32970		0.794187
AT1G33030	3.62846	3.46382	3.41244
AT1G33055		-0.581911	-0.707763
AT1G33110	0.774734	0.702589	0.495844
AT1G33240	-0.609884	-0.46819	-0.568637
AT1G33340		-0.69426
AT1G33390	0.679605	0.531419	0.663076
AT1G33440		-0.678968
AT1G33590	1.6097	1.42063	1.42063
AT1G33600	1.6647	1.32123	1.42003
AT1G33610	1.32591	1.17955	0.997851
AT1G33612	1.93997	1.42238	1.94191
AT1G33720	-0.592567	-0.625374	-0.548005
AT1G33760			-0.92578
AT1G33790	0.697024	0.704205	0.689342
AT1G33840	0.925256	0.680437	0.575875
AT1G33870	0.886664		0.708518
AT1G33960		1.35727
AT1G34060	-1.01917	-0.910925
AT1G34180	0.660248
AT1G34260	0.917998	0.856325	0.697403
AT1G34315	0.692847	0.812297	0.701834
AT1G34370	0.642745	0.624548	0.521639
AT1G34420	1.31557	0.960326	1.06175
AT1G34750	1.44685	1.09001	1.16835
AT1G34760	-0.603765	-0.551296	-0.44269
AT1G35140	-1.13987	-0.87868	-1.2537
AT1G35210	0.842225	0.838506
AT1G35230	2.4138	2.39614	2.40902
AT1G35290		-0.721119
AT1G35350	0.732368	0.604347	0.477084
AT1G35625			0.725677
AT1G35710	1.37261	1.39787	1.00738
AT1G36622	4.0747	4.13714	3.67553
AT1G36640	2.27933	1.53555	2.05576
AT1G38131			-0.666914
AT1G42430	-0.781296		-0.907603
AT1G42550	-0.785706	-0.523479	-0.827931
AT1G42560	-1.07158	-0.809394	-1.3301
AT1G42990	1.13951	1.12929	0.887573
AT1G43000	0.840066	1.01453
AT1G43040	-0.712587
AT1G43160	0.753736
AT1G43670	-0.519577		-0.602158
AT1G43910	0.682232	0.464452	0.578762
AT1G44010	0.826756	0.928312	0.970394
AT1G44130	1.31428
AT1G44350	0.750771	0.732339
AT1G45145	0.840767		0.469648
AT1G45230	-0.541388	-0.358298	-0.589648
AT1G45616	-0.663944	-0.826987	-0.739732
AT1G46480	-0.586154	-0.687213	-0.564058
AT1G47130	3.68179	3.412	2.85819
AT1G47480	0.791189	0.479668	0.935935
AT1G47510	2.31235	2.09401	1.88115
AT1G47560	0.722853	0.540595	0.835211
AT1G47580	-0.649628	-0.393762	-0.595384
AT1G47655	-0.852233		-0.686755
AT1G47890	3.29074	2.50641	2.63954
AT1G47960			-0.686101
AT1G48330			-0.591557
AT1G48605	0.686428	0.671476
AT1G48640	0.900371
AT1G48745	0.587171
AT1G48850	0.810087	0.684778	0.571499
AT1G49000	4.3746	4.50089	4.30522
AT1G49030	1.73471	1.48317	1.73719
AT1G49500	-1.27861	-0.908956	-1.06372
AT1G49510	-0.450233	-0.464563	-0.63906
AT1G49570			1.16136
AT1G49780	-0.799835	-0.43828	-0.593743
AT1G49840	-0.701743	-0.548864	-0.679033
AT1G50020	-0.444964	-0.3245	-0.586094
AT1G50040	-0.999743	-0.979698	-0.873457
AT1G50180	0.934783	0.959423	0.697555
AT1G50360	0.753708	0.84842	0.763908
AT1G50740	0.97315	0.759807	0.691658
AT1G51270	1.37445	1.28971	1.16777
AT1G51405			-0.635824
AT1G51420	0.831733		0.575455
AT1G51620	3.09235	2.99246	2.52262
AT1G51645	0.465946	0.661785	0.68865
AT1G51660	0.858548	0.834273	0.613757
AT1G51670	1.46902	1.05289	1.17002
AT1G51680	0.878849	0.725723	0.622115
AT1G51760	1.80556	1.62322	1.2925
AT1G51790	2.60912	2.49391	2.50547
AT1G51800	3.43343	3.26622	3.14267
AT1G51810	0.66748
AT1G51820	3.3399	3.17801	2.65053
AT1G51830	0.8226		0.563149
AT1G51840	0.773336		0.851696
AT1G51850	2.33022	1.99738	1.95313
AT1G51860	1.47256	1.03979	1.31149
AT1G51890	3.60248	2.9928	3.32087
AT1G51913	2.52898	2.75675	2.3112
AT1G51915	2.00122	1.65868	1.69161
AT1G51920	2.33319	2.4214	2.1899
AT1G52100		-0.612746	-0.663393
AT1G52200	2.5697	2.39341	2.34452
AT1G52240	0.678363
AT1G52270	0.921518	1.02236	0.840059
AT1G52330			0.670408
AT1G52342	-0.863568	-0.682861	-1.1313
AT1G52565	0.649652
AT1G52700	-0.656786		-0.572784
AT1G52750	-0.882901	-0.865135	-0.720688
AT1G52770	1.25339	0.876844
AT1G52780	0.770637	0.528894	0.678804
AT1G52890	1.08581	1.03819	0.684955
AT1G53080	0.76345	0.928307
AT1G53160	-0.623371	-0.535107	-0.703218
AT1G53330			0.925603
AT1G53390	0.960312	0.673647	0.834942
AT1G53430	1.21819	0.911543	1.03633
AT1G53440	0.700265	0.596491	0.470506
AT1G53490	0.901141	1.0765
AT1G53540	2.36381	1.75715	1.84312
AT1G53625	3.6324	2.91472	3.50724
AT1G53633	1.07252	1.08991	0.978195
AT1G53635	0.932257
AT1G53640	0.738844
AT1G53700	1.3456	1.19868	0.97666
AT1G53800	-0.605797	-0.460351	-0.563913
AT1G53801			0.803708
AT1G53830	-0.892711	-0.77177	-0.575944
AT1G53920	1.0423	0.854358	0.8814
AT1G53950	1.31427		1.31289
AT1G53970	0.899755	1.32942
AT1G53980	2.28405	1.81077	2.0334
AT1G53990	1.66266	1.45697	1.47033
AT1G54050	1.566	1.09346	1.09054
AT1G54095		-0.671016
AT1G54120	-0.72956		-0.607255
AT1G54500	-0.674807	-0.392732	-0.61368
AT1G54575	1.17039	0.906999	0.799796
AT1G54740	-0.741491	-0.6552	-0.714683
AT1G54890	1.03968	0.707235	1.03499
AT1G54950			0.70839
AT1G55020	0.910885	0.616475	0.934119
AT1G55175	0.906998
AT1G55230	0.814368	1.20746
AT1G55330	-0.878048	-1.06862	-1.16062
AT1G55365		0.956421	0.705821
AT1G55370	-0.674101	-0.523948	-0.536212
AT1G55450	2.00979	1.58953	1.55614
AT1G55673			1.02806
AT1G55850	0.865101	0.771825	0.69244
AT1G55910	0.663885	0.571039	0.415847
AT1G55920	1.43121	1.19879	1.30382
AT1G55960	-0.614739		-0.831223
AT1G56060	2.58385	2.57713	2.46459
AT1G56130			0.672754
AT1G56140	1.7522	1.56488	1.49314
AT1G56145	0.720929	0.608886	0.688264
AT1G56240	3.00745	2.75262	2.71487
AT1G56242		1.23524	1.47807
AT1G56250	2.67932	2.96515	2.59908
AT1G56300	0.889688	0.783258	0.621231
AT1G56320			0.608828
AT1G56710			0.794978
AT1G57570	0.995349
AT1G57590	-0.755146	-1.08461	-0.788354
AT1G57630	4.54257	3.95388	3.80721
AT1G57650	1.97081	1.56455	2.14193
AT1G57790	-0.694149	-0.484313	-0.618004
AT1G57980	-0.834285	-0.773022	-0.578471
AT1G57990	0.661396	0.510121
AT1G58037	-1.08116
AT1G58225	1.11497	0.937481
AT1G58340	0.721462	0.893666	0.638399
AT1G58410	0.459287	0.487113	0.686308
AT1G58420	2.07018	2.04205	2.27125
AT1G58520			-0.597922
AT1G58590	1.477	1.04699	1.11064
AT1G58602	0.768275	0.707575	0.667692
AT1G59218		0.794925	1.28146
AT1G59860	3.09365	2.50633	2.6521
AT1G59865	3.02747	2.45333	2.59659
AT1G59870	1.78471	1.54685	1.53481
AT1G59910	0.669996	0.574103	0.499496
AT1G59950	3.20283	3.10401	2.73688
AT1G59960	0.605845	0.581044	0.61104
AT1G60050		-0.660598
AT1G60095			0.868386
AT1G60110	0.67032
AT1G60130	0.690416	0.581107
AT1G60160	-0.700421	-0.551467	-0.793295
AT1G60190	-0.819154	-0.854135
AT1G60270			-0.597484
AT1G60440	0.627634	0.502241	0.446769
AT1G60730	1.75323	1.47702	1.38933
AT1G60740		0.886966
AT1G60750	1.04974	0.93604	1.02262
AT1G61050		-0.749104
AT1G61120	1.6017	1.9272	1.40586
AT1G61130		0.68217
AT1G61140	0.653022	0.484195	1.59116
AT1G61150			0.824693
AT1G61230			0.968509
AT1G61250	0.82594	0.785181	0.716811
AT1G61255	1.6846	1.24798	1.15151
AT1G61275	0.781467		0.807828
AT1G61280	0.85965	0.629803	1.01423
AT1G61290	1.39093		0.820222
AT1G61320	0.769333
AT1G61340	0.63863	0.501008	0.515781
AT1G61360	2.8476	2.51363	2.48207
AT1G61370	1.98249	1.80208	1.73273
AT1G61380	1.48927	1.47119	1.2833
AT1G61400	1.28772	1.11816	1.28324
AT1G61420	1.85574	1.66646	1.80929
AT1G61430	1.31521	1.2454	1.22727
AT1G61440	1.23466	0.880404	1.12311
AT1G61550	1.80645	0.841895	1.35793
AT1G61560	2.87475	2.1925	2.51045
AT1G61562			0.669166
AT1G61610	0.915878	1.01269	0.885666
AT1G61640	0.914808	0.706271	0.7729
AT1G61800	2.67154	2.49605	2.23264
AT1G61810	2.04534	2.10326	1.3862
AT1G61900	-0.575146	-0.40708	-0.667676
AT1G62300	2.10107	2.05548	1.84953
AT1G62305	0.973909	0.871729	0.769085
AT1G62360			-0.588913
AT1G62420	1.03115	1.07875
AT1G62510	-1.11346	-0.968058	-1.08103
AT1G62740	0.907979	0.574941	0.710646
AT1G62750	-0.525796	-0.431913	-0.646686
AT1G62840	1.48749	1.28326	1.2489
AT1G63010	0.844789	0.708644	0.677363
AT1G63245	0.94873	0.887076	0.987679
AT1G63350	1.27811	0.947592	0.809266
AT1G63440	0.977139	0.754651	0.804659
AT1G63500	0.803505	0.540381	0.609113
AT1G63530	1.37923	0.781424	0.866382
AT1G63580	1.14888	0.995819	0.716791
AT1G63650	-0.729774	-0.529633	-0.484787
AT1G63720	1.42192	1.02846	0.831241
AT1G63750	0.861503
AT1G63840	0.741343	0.376587	0.647184
AT1G63860	1.01134	0.529912	0.722074
AT1G63870		0.618679
AT1G63930	1.04032	0.98484	0.986956
AT1G64065	0.955838	1.11648	0.896073
AT1G64160	2.10359	1.68078	1.57485
AT1G64170	1.98328	1.78821	1.78669
AT1G64220		-0.63574
AT1G64380	1.3778	1.2202	0.976572
AT1G64400	2.41501	1.90749	2.26382
AT1G64561	0.608355		0.846921
AT1G64563	0.925301	0.767284	0.729151
AT1G64610	1.02489	1.0358	0.70979
AT1G64625	-0.630982
AT1G64710	1.74514	1.55527	1.67251
AT1G64770	-0.574306	-0.402741	-0.627152
AT1G64940	2.13568	1.97233	1.98013
AT1G65040	0.729185	0.815492	0.593468
AT1G65230	-0.491496	-0.359445	-0.586588
AT1G65240	1.50669	1.42637	1.45493
AT1G65250	0.734158	0.884228	0.599035
AT1G65310	-1.04837	-1.30743	-1.17626
AT1G65390	1.96009	1.56315	1.46886
AT1G65450			-0.600031
AT1G65481	1.55507	1.09798	1.07963
AT1G65484	1.0093	1.08029	0.932866
AT1G65486	1.65858	2.20325	1.46078
AT1G65500	1.68037	1.87997	1.36659
AT1G65520	0.584545	0.595921	0.58108
AT1G65610	1.30318	1.04386	1.11908
AT1G65690	3.33908	2.36393	2.94648
AT1G65730	1.01984	0.91447	0.643901
AT1G65790	2.05392	1.06703	1.44654
AT1G65820	0.70677	0.645504	0.603953
AT1G65840	0.790512	0.560565	0.686357
AT1G65845	1.47769	1.50883	1.14012
AT1G65850	0.728697	0.769736	0.841048
AT1G65860			-0.832046
AT1G65870			-0.875482
AT1G65900	-0.683498	-0.656689
AT1G66080	0.701191
AT1G66090	2.0222	1.64914	1.52411
AT1G66130	-0.751494	-0.534858	-0.680174
AT1G66150	-0.586064	-0.50766	-0.466631
AT1G66160	0.568433	0.604647
AT1G66180	-0.901711	-0.677476	-0.993124
AT1G66190	-0.632573
AT1G66390	1.18002	0.937211	0.92822
AT1G66465	3.32634	3.09837	2.78501
AT1G66480	1.49269	1.44486	1.36913
AT1G66500	1.14726	0.766771	0.775317
AT1G66570	1.64513	1.32283	1.45399
AT1G66580	0.71289	0.646254	0.561163
AT1G66600	2.24287	2.18554	2.264
AT1G66650		-0.716245
AT1G66700	4.51644	3.94604	4.39895
AT1G66725	1.2425	1.17309	1.32447
AT1G66780	1.68694	1.92389	1.20939
AT1G66830	1.43505	1.00101	1.6041
AT1G66860	-0.709483	-0.785205	-1.10874
AT1G66880	2.20761	1.76182	1.99813
AT1G66920	2.45318	2.43191	2.0015
AT1G66930	0.878717	0.919973	1.31142
AT1G67148	1.08032		0.997759
AT1G67270	3.06608	2.75609	3.35051
AT1G67360	0.729475		0.438474
AT1G67460	0.682676
AT1G67470	1.13796	0.944536	0.586363
AT1G67520	1.67689	1.08762	1.30707
AT1G67590	-0.60962		-0.391739
AT1G67750		-0.593008	-0.538269
AT1G67800	1.14825	0.878988	0.99106
AT1G67810	2.13533	1.89525	1.64625
AT1G67850	0.794227	0.546729	0.561386
AT1G67910	-0.740447		-1.06034
AT1G67920	2.21918	2.23677	2.11054
AT1G67980	3.18814	2.92802	3.0968
AT1G68190	-0.697446	-0.562704	-0.595886
AT1G68238	-0.446731		-0.609546
AT1G68300	0.607317	0.499367	0.403829
AT1G68310	0.626724	0.439382	0.512075
AT1G68340	1.15547	1.08508	0.846742
AT1G68390	2.12492	1.51607	1.42603
AT1G68450	1.10762	1.21233	1.14947
AT1G68540		-0.618514
AT1G68620	1.70957	1.60412	1.48852
AT1G68670	-0.548857	-0.521923	-0.597649
AT1G68690	1.67517	1.31676	1.1478
AT1G68765	1.14021	1.2116	1.21352
AT1G69050	0.777984
AT1G69150	1.07331
AT1G69230	-0.597576
AT1G69450	0.765351	0.38629	0.514931
AT1G69520	1.39981	1.39703	1.28582
AT1G69730	1.06195	0.991298	0.8632
AT1G69750	1.4865	1.08679	1.16298
AT1G69810	0.76857	0.390237	0.821699
AT1G69840	0.889683	0.602026	0.587524
AT1G69900	1.4683	1.31787	1.0966
AT1G69920	4.92426	4.56628	4.47415
AT1G69930	3.1907	3.0395	3.40473
AT1G69960	0.889314	0.722853	0.839549
AT1G70090	-0.678389	-0.60306	-0.571388
AT1G70130	0.975061
AT1G70140	2.25805	2.09425	2.04032
AT1G70170	1.55514	0.636173	1.08141
AT1G70185	0.897211	0.835231
AT1G70260		-0.851731	-0.759794
AT1G70370	-0.554022	-0.521139	-0.623733
AT1G70420	1.25182	1.10783	1.27904
AT1G70500	0.638491
AT1G70520	1.25587	1.00145	1.10912
AT1G70530	1.42678	1.15234	1.22016
AT1G70581	0.854388		0.694946
AT1G70690	0.697403		0.632048
AT1G70810	0.739458	0.639897	0.46393
AT1G70820	-0.768664	-0.567726	-0.736739
AT1G70860		-0.850404
AT1G70890	-0.745627	-0.520095	-0.886279
AT1G70920	1.05295	0.922354	1.09602
AT1G71000	2.02693	1.67289	1.89644
AT1G71100	0.689587	0.761113	0.475456
AT1G71140	0.850267	0.679753	0.694794
AT1G71360	0.644211	0.558264	0.402857
AT1G71400	1.64632	1.24517	1.54503
AT1G71490	1.86524	1.49457	1.95326
AT1G71520	2.13329	1.65661	2.03275
AT1G71530	0.930181	0.810615	1.07268
AT1G71697	1.80819	1.36522	1.52182
AT1G71880	0.67316	0.619251	0.513087
AT1G72060	1.15149	1.26523	0.946494
AT1G72120	1.1517	1.08821	0.830171
AT1G72125	0.729182
AT1G72140			-0.697286
AT1G72150	-0.793472	-0.745402	-0.795359
AT1G72160	-0.498054	-0.613159	-0.492333
AT1G72240			-0.733433
AT1G72280	1.67181	1.366	1.39015
AT1G72416	0.607178	0.391232	0.401957
AT1G72430	-0.477149	-0.407665	-0.644367
AT1G72520	0.954171	0.836865
AT1G72540			0.826294
AT1G72545	0.798572		0.986074
AT1G72610	-0.619193	-0.404296	-0.684487
AT1G72660	1.02304
AT1G72790	-0.70361	-0.498718	-0.689419
AT1G72800			-0.594005
AT1G72870	0.805259
AT1G72900	0.795646	0.67195	0.575978
AT1G72970	-0.610589	-0.557632	-0.601403
AT1G73065	1.13557	0.810069	0.718214
AT1G73080	1.139	1.01806	0.837897
AT1G73120	-2.11831	-1.9913	-1.84152
AT1G73280	0.781284		0.863745
AT1G73325	0.748542	0.86594
AT1G73340	-0.952218	-0.652063	-1.18842
AT1G73360	-0.737139	-0.569098
AT1G73480	0.873808	0.570855
AT1G73730	0.674651	0.643422	0.533149
AT1G73740	0.599807	0.514157	0.446691
AT1G73750	-0.751248	-0.48273	-0.535438
AT1G73805		0.793586	0.635876
AT1G73810	2.28875	1.88739	2.15291
AT1G73965			0.844271
AT1G74010	1.6973	1.20953	1.31461
AT1G74020	0.735106	0.608052	0.68226
AT1G74080	2.77975	2.37829	2.5573
AT1G74100	1.45385	1.12368	1.36643
AT1G74290			-0.878393
AT1G74310	3.04095	2.29009	2.80621
AT1G74330	1.31989	1.36778	1.16244
AT1G74340	0.640947	0.500009
AT1G74350	0.807688	0.741759	0.581479
AT1G74360	3.32677	3.12867	3.10881
AT1G74385			0.833772
AT1G74430			-0.677515
AT1G74450		-0.561528	-0.701029
AT1G74590	2.12035	1.27022	2.10643
AT1G74650	1.39364	1.42649	1.81454
AT1G74670	-0.580997	-0.985389
AT1G74680	0.468263	0.347329	0.619815
AT1G74750	1.3048	1.05873	1.19571
AT1G74790	1.08918	1.01623	0.941653
AT1G74810	0.828211	0.710166	0.866082
AT1G74830			0.812263
AT1G74870	1.47052	0.846733	1.06292
AT1G74890		-0.918472
AT1G74930	-1.90746	-0.829662	-1.84803
AT1G74950			-0.802539
AT1G75000	0.690778		0.574625
AT1G75040	0.685753	0.928317
AT1G75170	0.774667	0.875866	0.654581
AT1G75190	-0.603318		-0.462898
AT1G75250	-0.795221
AT1G75270	1.25148	0.933541	1.2464
AT1G75290	1.04176
AT1G75750	-1.3762	-0.984261	-1.32164
AT1G75770	-0.832627		-0.686118
AT1G75780	-0.995357	-1.18174	-0.630257
AT1G75830	2.58842	2.28997	2.06788
AT1G75860	0.730106		0.564448
AT1G75900	-0.513135	-0.595588	-0.638834
AT1G76040	0.664967	0.430597
AT1G76065		0.590829	0.487118
AT1G76070	2.24867	2.1352	1.83277
AT1G76110	-0.892271	-0.770762	-0.936532
AT1G76130	1.19946	1.03674	1.0354
AT1G76390	0.716119	0.623723	0.4836
AT1G76470	2.04338	2.49171	2.4546
AT1G76480	1.10486	0.724504	0.89447
AT1G76570	-0.643764	-0.396001	-0.617744
AT1G76600	1.83778	1.32505	1.40298
AT1G76620		-0.7328
AT1G76680	0.791202
AT1G76690	0.888634		0.607305
AT1G76700	0.629081	0.38258	0.471993
AT1G76930	1.41661	1.203	1.21851
AT1G76970	1.63333	1.28798	1.39498
AT1G76980	1.25595	0.761263	1.29295
AT1G77060	-0.56342	-0.441329	-0.586253
AT1G77210	-0.762812	-0.60761	-0.681507
AT1G77280	0.719469	0.824602	0.760103
AT1G77380	0.832926	0.884761	0.761563
AT1G77410	0.650235	0.661916	0.548753
AT1G77450	1.06891	1.01383	0.856195
AT1G77500	0.979574	0.861545	0.922374
AT1G77510	0.891123	0.7295	0.785684
AT1G77570	0.66624
AT1G77640			-0.720106
AT1G77760	-0.601155		-0.650902
AT1G77810	0.82698	0.685498	0.73221
AT1G77920	0.635174		0.638849
AT1G77990	-0.35704	-0.702288	-0.511806
AT1G78000	1.52117	1.01901	1.41878
AT1G78130	0.64629	0.459597	0.605023
AT1G78210	0.813207		0.570292
AT1G78230	-0.601678		-0.708874
AT1G78410	2.39648	1.8492	2.09064
AT1G78440		-0.719788
AT1G78450	-0.872977	-0.483084	-1.14434
AT1G78476			-0.888335
AT1G78530			-0.651341
AT1G78720	-0.80793
AT1G78830	0.867957	0.727575	0.720624
AT1G78850	1.88641	1.55032	1.63231
AT1G78860	1.16878	0.645406	1.18982
AT1G78895	0.611662	0.567301	0.554847
AT1G78970	-0.426138	-0.594258	-0.631995
AT1G79110	0.74828	0.681286	0.597744
AT1G79120			0.597151
AT1G79180	1.03054		1.16937
AT1G79320	0.690909
AT1G79410	1.39604	0.994445	1.10814
AT1G79450	1.31665	0.808677	1.29113
AT1G79510	-0.412114		-0.589155
AT1G79520			-0.61707
AT1G79529	-0.951667
AT1G79670	0.689475	0.389516	0.62801
AT1G79680	4.42776	3.96756	4.32684
AT1G79690	0.61882	0.479636	0.545684
AT1G79710	1.65673	1.0801	1.40103
AT1G80130	0.620243	1.09788	0.728743
AT1G80450	0.906104	1.04025	0.680029
AT1G80460	0.63196	0.512491	0.555309
AT1G80820	2.35648	2.05126	1.90754
AT1G80840	1.67966	1.37579	1.16232
AT2G01010	-1.03034
AT2G01180	0.680913	0.513981	0.456144
AT2G01200			0.85225
AT2G01300	-0.623081		-0.735714
AT2G01340	0.476391	0.613312
AT2G01590	-0.451686		-0.594608
AT2G01610	-1.00826	-0.881657	-0.665157
AT2G01650	0.703116	0.523324	0.689045
AT2G01670	0.926661	0.794977	0.686866
AT2G01755	-0.73248	-0.352675	-0.630932
AT2G01850	-0.626303	-0.509855	-0.657088
AT2G01870	-0.507138	-0.443806	-0.714887
AT2G01918	-0.778736	-0.812854	-0.864533
AT2G01920	0.879303	0.640194	0.944129
AT2G02010	5.44	4.82525	5.29674
AT2G02061	0.870353
AT2G02180	0.624326	0.584969
AT2G02220	1.3699	1.2295	1.14418
AT2G02250	-0.821419
AT2G02340		0.633281
AT2G02350	0.895508		0.57833
AT2G02455			0.798561
AT2G02810	1.33331	1.21212	1.11132
AT2G02860	0.819592	0.784099	0.67496
AT2G02930	1.83254	1.61152	1.53688
AT2G03090	-0.69879	-0.632918	-0.548709
AT2G03260			0.652096
AT2G03310	-0.677832	-0.426926	-0.570479
AT2G03410	1.14319	1.23938	1.31031
AT2G03420	-0.480581	-0.478388	-0.736878
AT2G03505	0.69629	0.549111	0.996685
AT2G03750	-0.611509	-0.439699	-0.606857
AT2G03760	0.624693
AT2G03880			-0.74707
AT2G04040	1.12346	1.10579	0.89513
AT2G04070	2.14788	1.46488	1.39042
AT2G04160	0.596679	0.559335	0.341932
AT2G04400	1.83769	1.59255	1.55074
AT2G04430	0.640222	0.527122	0.713727
AT2G04495	2.07604	1.62526	1.83243
AT2G04515	0.628329	0.611547
AT2G04755			0.827282
AT2G04790	-0.784581	-0.474214	-0.748519
AT2G05160	-0.634087	-0.527284	-0.414053
AT2G05520	0.899792	0.803657	0.79546
AT2G05875	1.67872	1.70292	1.57534
AT2G05914		0.867837
AT2G05940	0.826574	0.472797	0.516535
AT2G06002		-0.852391
AT2G06050	0.924742	0.70542	0.509613
AT2G06485	0.601631
AT2G06850	-0.582627	-0.624052	-0.663158
AT2G07180	0.586181	0.557732	0.550611
AT2G07335		0.713552
AT2G07475			0.784883
AT2G07875			0.959232
AT2G08340	0.724919		2.18133
AT2G08420			1.09034
AT2G08435			0.854886
AT2G08440			0.994986
AT2G08450	0.668196
AT2G08470			0.733057
AT2G08480			0.731899
AT2G08650	0.684642	0.955276	0.630161
AT2G08665			1.06316
AT2G08750			1.28131
AT2G08780			1.08641
AT2G08865			0.699205
AT2G08915			0.780794
AT2G09225			0.815042
AT2G09250			1.23236
AT2G09350			0.650753
AT2G09420			0.896878
AT2G09510			0.70958
AT2G09975			0.877685
AT2G10940	-0.664852	-0.531406	-0.674702
AT2G11270	0.753534		0.707331
AT2G13650	0.895106	0.879464	0.609675
AT2G13665	0.44134	0.852067	0.472833
AT2G13790	1.91251	1.71245	1.71779
AT2G13810	0.902565
AT2G14115		0.6474
AT2G14290	0.946108	0.878201
AT2G14560	0.815856	1.13813	0.972769
AT2G14750	0.597642		0.605241
AT2G14920	-0.772943
AT2G14960		-0.924328
AT2G15042	1.26308	1.21148	1.0371
AT2G15080	0.798202	0.613153	0.48997
AT2G15090	-0.876561	-0.636911	-0.723474
AT2G15128		-0.531527	-0.726777
AT2G15220	1.29653		1.31845
AT2G15390	2.429	2.27449	2.29272
AT2G15480	2.35397	1.80207	2.07844
AT2G15490	2.3085	1.82031	1.97103
AT2G15760	2.2821	1.76295	1.79316
AT2G15780	3.57545	3.16903	2.40232
AT2G15830	0.970764	0.71138	0.498005
AT2G15890	-0.746763	-0.673612	-0.748431
AT2G15970	-0.548262	-0.537261	-0.608863
AT2G16060	1.00392	0.778749	0.892599
AT2G16230	-0.781005
AT2G16500	0.880171	0.848803	0.800084
AT2G16595	0.967125	0.546342	0.814837
AT2G16660	0.843991		0.918213
AT2G16760			0.645304
AT2G16870	0.709597
AT2G16900	1.38279	1.18881	1.26634
AT2G17040	0.834034	0.881469	0.565387
AT2G17060	0.710473
AT2G17080	-0.741633	-0.763375
AT2G17120	1.51628	1.4186	1.36472
AT2G17130	0.826095	0.704205	0.780715
AT2G17220	0.749616	0.721388	0.560021
AT2G17230	-0.968351	-0.718372	-0.794337
AT2G17290	0.674311	0.487192	0.567588
AT2G17300	-0.745608	-0.716999	-0.587548
AT2G17500	0.854051	0.544042	0.626479
AT2G17550	-0.582036	-0.678759	-0.529909
AT2G17660			-0.756705
AT2G17705	1.55204	1.33346	1.38392
AT2G17710	0.916917	0.677792	0.662863
AT2G17720	1.30112	1.00551	1.1339
AT2G17740	4.70742	4.77542	4.78052
AT2G17760	0.965842	0.678678	0.815649
AT2G17890			-0.626199
AT2G18000	1.14881		1.02454
AT2G18010	1.05378		0.854322
AT2G18050	-0.662574	-0.734158
AT2G18210	0.78934	0.60913	0.694577
AT2G18260	-0.54209	-0.792036	-0.65879
AT2G18300	-0.796833	-0.806441	-0.546971
AT2G18328		-0.667365	-0.605964
AT2G18350	0.53067		0.641161
AT2G18470		-0.926224
AT2G18560	-0.637496
AT2G18660	1.96969	2.15349	2.12461
AT2G18680	3.76719	3.58394	3.45617
AT2G18690	3.08542	2.86815	2.81835
AT2G18800	-0.886466	-0.912325
AT2G18860	0.888673	0.468979	0.607515
AT2G18890	-0.732643	-0.942075	-0.608413
AT2G18940	-0.545607	-0.402969	-0.675113
AT2G18969	0.721479
AT2G18970	1.11525
AT2G18980	-0.731068	-0.764137	-0.615273
AT2G19130	1.13094	1.06752	0.988933
AT2G19160	0.588032	0.525113	0.569588
AT2G19190	6.60012	6.03725	6.30651
AT2G19310	0.71971	0.593685	0.539265
AT2G19450	1.45494	1.07481	1.43077
AT2G19570	0.649245	0.493323	0.583013
AT2G19590	1.49229	0.933557	1.32509
AT2G19620	-0.738381	-0.603469	-0.564041
AT2G19780		-0.603319
AT2G19920	-0.590928	-0.781111	-0.67312
AT2G20010	0.989529	0.783146	0.888353
AT2G20030	0.801136		0.858193
AT2G20050	-0.434257	-0.408982	-0.65033
AT2G20080		-0.795397
AT2G20130	0.626304	0.423781	0.441135
AT2G20142	1.55496	1.6387	1.02958
AT2G20150	0.688561
AT2G20320	1.518	1.30832	1.19594
AT2G20560	2.56701	1.918	2.22677
AT2G20562	1.83891	1.50538	1.54498
AT2G20610	0.60713
AT2G20630	0.77382	0.570275	0.577274
AT2G20670	-1.16158	-0.698253	-0.872926
AT2G20750	-0.909283	-0.884154	-0.976458
AT2G20780	0.6492	0.566443	0.712807
AT2G20900	0.886902	0.85731	0.771626
AT2G20940		0.631571	0.470232
AT2G20950	0.632018	0.598012	0.50255
AT2G20960	1.2836	1.0964	1.03242
AT2G21140	-0.320492		-0.605887
AT2G21188		0.711425
AT2G21260	-0.611124
AT2G21350	0.7575	0.672445	0.676048
AT2G21530	-0.591932		-0.571107
AT2G21620	1.35396	1.30812	1.14364
AT2G21850	0.710191		0.828756
AT2G22010	0.623592	0.548071	0.381788
AT2G22200			-0.698287
AT2G22470	1.39821	1.03241	1.05489
AT2G22500	1.02611	1.11781	0.989972
AT2G22810	0.79966	0.907397
AT2G22860	0.919853	0.966244
AT2G22880	2.56723	2.52139	2.13549
AT2G22930	-0.779092	-0.710057
AT2G22980	-0.765727	-0.764207	-0.679619
AT2G23100	-0.602063	-0.541071	-0.975625
AT2G23110	-0.874906
AT2G23130	-0.711101	-0.720598	-0.86033
AT2G23170	1.34471	1.22478	0.785143
AT2G23270	2.20915	2.06261	1.98649
AT2G23320	1.26312	1.11267	0.824325
AT2G23410			-0.770387
AT2G23420	0.788521	0.52784	0.565129
AT2G23560		-0.62581
AT2G23630	-0.657757	-0.685583
AT2G23680	1.92422	1.86953	1.44864
AT2G23690	-0.777946		-0.496523
AT2G23770	1.7493	1.26659	1.47856
AT2G24130	0.751151		0.704113
AT2G24180	1.1754	1.15808	1.10697
AT2G24490	1.25308	0.697608	1.05927
AT2G24500	0.86688	0.664216	0.675611
AT2G24570	0.916569	0.886819	1.20356
AT2G24600	1.2237	0.855528	0.701909
AT2G24645		-0.725289	-0.619613
AT2G24850	1.70274	1.94826	1.3777
AT2G24970			-1.00097
AT2G25000		0.590705	0.494566
AT2G25080	-0.530955	-0.475685	-0.660949
AT2G25125	1.40977	1.27851	0.989186
AT2G25160	-0.772392	-1.36184	-0.972844
AT2G25200	-1.42223	-0.847282	-0.952858
AT2G25220		-0.59291
AT2G25240	1.09676
AT2G25260	0.624977		0.729874
AT2G25297	4.05751	4.03094	4.0596
AT2G25410	0.99404	0.858879	0.810551
AT2G25440	1.20962	1.34994	1.21123
AT2G25460	0.776453	0.715471
AT2G25470	3.36801	2.93002	2.60286
AT2G25510		0.661255
AT2G25735	1.86299	1.83975	1.47719
AT2G25737	0.605553	0.450802	0.596914
AT2G25770	-1.36109	-0.8531	-1.22557
AT2G25850	0.777154	0.784943	0.666418
AT2G25900	-0.755756	-0.53783	-0.685506
AT2G26010	1.20951	0.609065	0.713235
AT2G26020	1.74114	1.97126	1.60183
AT2G26080	-0.576926	-0.399761	-0.73381
AT2G26150	3.57481	2.68308	3.15254
AT2G26290	0.576531		0.829779
AT2G26380	1.90366	0.957738	0.899265
AT2G26390			0.822882
AT2G26400	1.01183		0.783231
AT2G26440	2.19501	1.82347	2.07855
AT2G26530	1.04964	0.871536	0.54416
AT2G26560	2.22446	2.1127	1.84403
AT2G26650	0.749402	0.630362	0.803287
AT2G26820	1.21801	0.685213	0.98795
AT2G26980	-0.754811	-0.727731	-0.792836
AT2G27010	-0.719175
AT2G27150	0.693741	0.491873
AT2G27200	0.841396	0.494134	0.669808
AT2G27310	0.825057	0.783154	0.666602
AT2G27385	-0.803257	-0.60402	-0.709782
AT2G27389	2.33826	2.39816	2.40623
AT2G27390			1.15406
AT2G27580	0.730787	0.666382	0.67144
AT2G27660	2.23324	1.94908	1.98195
AT2G28140		-0.810219
AT2G28210	2.8702	2.33389	2.29858
AT2G28270			0.819788
AT2G28400	0.859417	0.823221	0.800835
AT2G28410			-0.625246
AT2G28570	1.5952	1.25067	1.35468
AT2G28630	0.651087	0.489969	0.43891
AT2G28690	0.857149
AT2G28710	1.38124	1.0664	1.22417
AT2G28755	1.04023	0.705739
AT2G28840	0.51583	0.521506	0.597557
AT2G28850	0.922775		0.708605
AT2G28890	1.2972	0.984241	1.10573
AT2G28940	0.706912	0.522797	0.809946
AT2G28960	0.889635	0.656348	0.92369
AT2G28970	1.01252	0.648121	1.13238
AT2G29065	1.30697	0.925471	1.14308
AT2G29100	2.90449	2.69117	2.86368
AT2G29110	2.45008	1.87168	2.16992
AT2G29120	1.2863	1.34534	0.913753
AT2G29150	0.852335		0.653376
AT2G29170	0.808271	0.920795
AT2G29290	-0.636283	-0.489312	-0.585462
AT2G29300		-0.698378
AT2G29330	0.573698	0.520481	0.615972
AT2G29350	2.66139	2.46008	2.70571
AT2G29370	-1.19332	-1.15023	-1.44552
AT2G29410		0.653254	0.669544
AT2G29420	0.841692		0.689543
AT2G29430	1.23858	0.973249	1.00617
AT2G29440	0.954986	0.592302	0.522473
AT2G29460	2.67952	2.33916	2.40544
AT2G29470	2.79932	2.55009	2.53093
AT2G29480	1.23328	0.867379	0.808744
AT2G29500	2.69901	1.89729	2.11516
AT2G29670	-0.712378	-0.719458	-0.702756
AT2G29680		-0.63871	-0.54483
AT2G29720	2.85459	2.72659	2.29429
AT2G29750	-0.686035	-0.83185
AT2G29950	0.716311		1.14267
AT2G29990	1.38877	1.2683	1.30313
AT2G30040	0.57525	0.7104	0.6264
AT2G30140	1.11344	1.00612	0.841354
AT2G30250	0.810177	0.627971
AT2G30380	-0.708016
AT2G30395	0.643677	0.828353	0.940489
AT2G30400	1.717	1.5054	1.46979
AT2G30420	-0.872713		-0.628066
AT2G30440	0.705258	0.648683	0.560141
AT2G30490	1.03681	0.878944	0.826782
AT2G30550	1.36148	1.36141	1.24137
AT2G30615			1.43265
AT2G30660	1.37281	0.639024	1.07796
AT2G30670	1.07899	0.645161	1.16076
AT2G30720	1.17	1.07106	0.815626
AT2G30750	1.50534	1.29088	1.41555
AT2G30770	3.21954	3.06799	3.5497
AT2G30790	-1.00318
AT2G30820			-0.657453
AT2G30870	1.85852	1.60438	1.74613
AT2G30930	-0.623585	-0.60117	-0.664422
AT2G30990	0.708784	0.497367	0.536142
AT2G31020	1.64509	1.18499	1.56321
AT2G31141			0.912395
AT2G31230	1.58767	1.26556	1.20914
AT2G31335	1.33657	1.26748	1.36353
AT2G31345	2.96368	2.49605	2.62661
AT2G31585	0.748805	0.605523	0.734851
AT2G31750	-0.507951	-0.409378	-0.672282
AT2G31751	0.657277	0.477058	0.726928
AT2G31865	1.37739	0.932477	1.13679
AT2G31880	0.97901	0.90898	0.776247
AT2G31945	0.803751	0.848413	0.622591
AT2G31955	0.764965	0.723097	0.467765
AT2G31990	0.76714
AT2G32020	1.2017	0.979144	0.861932
AT2G32030	0.962925	1.08197	0.659744
AT2G32120	1.23788	1.14238	0.756258
AT2G32140	1.469	1.24352	0.764619
AT2G32190	1.33073	1.04308	0.94365
AT2G32200	1.51006	1.04264
AT2G32210	1.82107	1.47735	1.64961
AT2G32240	2.0581	1.72021	1.67597
AT2G32250	1.31715	1.1172	1.04909
AT2G32400	0.622424	0.522163	0.713288
AT2G32470			0.702128
AT2G32530	-1.10378	-0.848608	-1.28201
AT2G32540	-0.587921	-0.419354	-0.745621
AT2G32610	-1.15442		-0.644129
AT2G32640	-0.385294		-0.619257
AT2G32660	1.43865	1.15257	1.1541
AT2G32670	1.07208	1.14295
AT2G32680	2.87899	2.74497	1.94305
AT2G32830	0.72186
AT2G32990			-0.763848
AT2G33100		0.966123
AT2G33110	0.910616	0.85361	0.765485
AT2G33120	0.688634	0.599554	0.606931
AT2G33130	0.846336	0.784345	0.955537
AT2G33510	-0.623168	-0.466167
AT2G33600	0.835029	0.712042	0.672913
AT2G33710	2.93173	2.38465	2.38627
AT2G33735			-0.620792
AT2G33750	-0.970038
AT2G33780	0.666484	1.00048	0.632615
AT2G33790	-0.903494	-1.15623
AT2G33810	-0.6203		-0.516746
AT2G33815	-0.773605
AT2G33855	-0.653755	-0.355799	-0.637652
AT2G33880		0.643838
AT2G34000		0.64665	0.786379
AT2G34180	0.834291		0.555545
AT2G34250	0.658994	0.565859	0.520455
AT2G34350		-0.711387
AT2G34355	0.880923	0.747607	0.579836
AT2G34360	0.893512	0.916789	0.943958
AT2G34390	1.36941		1.05309
AT2G34430	-0.60197	-0.354519	-0.335483
AT2G34500	2.64338	2.46121	2.38839
AT2G34510	-0.900329	-0.87671	-0.902583
AT2G34600	-0.994342	-0.739559	-1.47494
AT2G34620	-0.449138	-0.452535	-0.587939
AT2G34790	0.760977	0.709528
AT2G34930	2.05277	1.63964	1.6421
AT2G34940	0.663814
AT2G34960		0.734819
AT2G35000	0.545366		0.80723
AT2G35075			-0.669901
AT2G35170	-0.584056		-0.668859
AT2G35260	-0.596531	-0.438795	-0.464009
AT2G35290			-0.867974
AT2G35510	0.713729	0.600039	0.596851
AT2G35610	0.645569	0.458215	0.730061
AT2G35658	0.89736	1.3301	1.10705
AT2G35730	1.86352	1.59958	1.47192
AT2G35742			0.698976
AT2G35800	-0.547964	-0.499633	-0.647778
AT2G35910	0.798528	0.799128	0.535808
AT2G35930	2.67727	2.55111	2.37662
AT2G35935	0.860144		1.35254
AT2G35965	0.610973	0.741563	0.620715
AT2G35980	3.79226	2.77931	3.22308
AT2G36050	-0.874285	-0.728808	-0.703925
AT2G36090			0.655856
AT2G36210	2.49828	1.92798	2.03025
AT2G36270	1.19678	1.19851	0.85886
AT2G36325			0.656959
AT2G36330	0.694361		0.66025
AT2G36430	-0.790372	-0.560722
AT2G36470	0.930104	0.826142	0.716123
AT2G36540		-0.838081	-1.05012
AT2G36580	0.87495	0.551376	0.697706
AT2G36630	0.81203	0.706775	0.418962
AT2G36690	2.57919	2.3883	2.65305
AT2G36750	0.698997
AT2G36770	2.60411	2.13062	2.19412
AT2G36780	2.10832	1.33397	1.89653
AT2G36790	0.633104
AT2G36800	0.692668		0.572148
AT2G36880	0.670509	0.483275	0.593647
AT2G36890	0.700764		1.15104
AT2G36950	0.699667	0.661425
AT2G36970	0.729012	0.800475	0.57513
AT2G36990	-0.574634	-0.449593	-0.623902
AT2G37025	-0.816592	-0.782937	-0.674899
AT2G37040	1.44821	1.21147	1.13599
AT2G37110	0.845572	0.735338	0.674842
AT2G37150	1.02909	0.770082	0.697922
AT2G37380			-0.592752
AT2G37430	3.36646	3.12802	3.1047
AT2G37555			0.898903
AT2G37700	-0.779126	-0.725473
AT2G37710	1.49921	1.49605	1.22726
AT2G37750	0.590435
AT2G37770	-0.522711	-0.704349	-0.78459
AT2G37810		0.894375	0.701902
AT2G37820		0.996372	0.725029
AT2G37940	1.59108	1.30039	1.36486
AT2G37970	0.857517	0.892957	0.551122
AT2G37980	1.51506	1.02385	1.34548
AT2G38170	-1.07437	-0.958418	-1.17859
AT2G38210	-0.686137		-0.733749
AT2G38230	-0.791188	-0.465938	-0.867205
AT2G38240	1.08662	1.01249	0.805713
AT2G38250	1.43676	1.28747	1.00132
AT2G38290	1.61448	1.5168	1.44114
AT2G38340	0.909969
AT2G38460	-0.76556	-0.646256	-0.680184
AT2G38470	1.29739	1.19634	0.734082
AT2G38480	-1.24594	-0.792012	-1.17855
AT2G38490	1.39602	1.07444	1.13336
AT2G38720	-0.602121
AT2G38750	-0.564633	-0.645511	-0.742829
AT2G38823	-0.710715
AT2G38860	2.87942	2.38559	2.83917
AT2G38870	3.57175	3.27959	3.47216
AT2G38940	1.16121	0.759994	0.969408
AT2G38960	0.973541	0.834048	0.652985
AT2G39010	-0.631478	-0.45483	-0.551469
AT2G39030	2.43684	2.381	1.13012
AT2G39200	3.32442	3.22298	3.15634
AT2G39210	1.91266	1.78149	1.82553
AT2G39350	0.750088	0.580303	0.698907
AT2G39375			0.603373
AT2G39380	2.73549	1.92154	2.3615
AT2G39400	1.83513	1.73093	1.44162
AT2G39410	0.773604		0.502046
AT2G39420	0.754507	0.581731	0.540107
AT2G39435	0.662463	0.543579	0.625916
AT2G39490		0.830159
AT2G39518	2.86114	2.76685	2.4999
AT2G39530	2.01713	1.64161	1.84197
AT2G39570	-0.540421	-0.455704	-0.608226
AT2G39660	1.37599	1.1652	1.09427
AT2G39800	-0.601908	-0.37283	-0.568799
AT2G39870	-0.516975	-0.482141	-0.641403
AT2G40095	1.46234	1.21289	1.32195
AT2G40113	1.18211	1.19102	0.61341
AT2G40140	0.675179	0.652721	0.498617
AT2G40170	0.887771	0.684141
AT2G40180	3.61158	3.17878	3.13309
AT2G40270	0.618622	0.653438	0.393522
AT2G40330	0.671367	0.648469	0.590789
AT2G40340	1.7424	1.48903	1.60516
AT2G40420	-0.592975	-0.617845	-0.702839
AT2G40715	0.887205		1.00666
AT2G40740	1.81077	1.6527	2.02916
AT2G40750	1.04484	1.06207	0.935602
AT2G40940	0.687672	0.734468	0.639952
AT2G41090	0.674165	0.566046	0.635774
AT2G41100	0.876964	0.725227
AT2G41105	0.90769		2.08933
AT2G41110	1.06733	0.841407	0.97235
AT2G41170	1.40854	1.27699	0.974334
AT2G41178			0.751855
AT2G41180	0.930499	1.15	1.03769
AT2G41230	1.22501	1.22522	1.07206
AT2G41280	0.832187	0.759594
AT2G41330		-0.649715	-0.558708
AT2G41342	1.15351	0.939025	1.13969
AT2G41380	1.82509	1.86805	1.52583
AT2G41440	0.649866	0.538708	0.4623
AT2G41560	-0.606508	-0.439542	-0.568947
AT2G41730	1.70295	1.22678	1.17628
AT2G41835	1.73868	1.47784	1.28658
AT2G41880	1.25764	1.18656	0.943789
AT2G41905		0.837767
AT2G41990	-0.604835
AT2G42060	2.14892	1.83779	1.9746
AT2G42170	-0.837008	-0.749716	-0.717717
AT2G42330	0.634088	0.598165	0.530412
AT2G42340		0.807336
AT2G42350	1.13961	0.75117	0.96014
AT2G42360	2.3975	2.61108	1.80536
AT2G42380	-0.615956	-0.564243	-0.878976
AT2G42530	-0.510614		-0.688364
AT2G42570	-0.653117	-0.707375	-0.390141
AT2G42660			-0.672772
AT2G42900	-0.881472	-0.749791	-0.918041
AT2G42980	0.730722
AT2G43000	2.92196	1.9201	2.80157
AT2G43120	1.34974	0.954761	1.44146
AT2G43140	1.01395	1.23558	1.03438
AT2G43150	0.615227	0.306226	0.595497
AT2G43160	0.642376	0.637218	0.542144
AT2G43290	-0.853431	-0.669978	-0.773722
AT2G43480	-0.76303
AT2G43510	1.58906	1.72056	1.47592
AT2G43520		0.589595
AT2G43530			-0.746162
AT2G43550			-0.809087
AT2G43570	1.56992	0.873227	1.28708
AT2G43580			0.719228
AT2G43590	2.10303	1.37055	2.13772
AT2G43610	0.403127		0.80386
AT2G43620	5.74819	5.30875	5.25877
AT2G43870	0.735273
AT2G43880	-1.07132		-0.788599
AT2G44010	0.778498		0.693836
AT2G44070	1.58934	1.47147	1.40234
AT2G44080	1.10432	1.14926	0.921144
AT2G44110		-0.684739
AT2G44195		0.741317
AT2G44230	-1.04195	-0.948336	-0.936689
AT2G44310	0.645461	0.612648	0.503729
AT2G44370	3.16868	2.97273	2.97216
AT2G44380	0.848154	0.697627	0.813497
AT2G44480	1.04663	0.648758	0.740205
AT2G44490	1.37818	1.08922	1.13621
AT2G44578	1.7629	1.90777	1.94485
AT2G44600	0.659868	0.858551	0.693884
AT2G44740	-1.1071	-0.87024	-1.05072
AT2G44790	1.30067	1.05537	1.37557
AT2G44910	-0.722592	-0.760962
AT2G45210	0.603403	0.731354	0.529659
AT2G45220	1.81869	1.47644	1.45949
AT2G45290	0.882018	0.64373	0.663613
AT2G45300	0.911242	0.799533	0.72031
AT2G45350	-0.711181
AT2G45570	1.69753	1.66749	1.399
AT2G45600	-0.679296		-0.519913
AT2G45680	0.523517	0.666442
AT2G45760	0.952615	0.91134	0.78168
AT2G46140	1.09715	0.876009	1.14726
AT2G46150	1.32184	0.722294	1.02283
AT2G46160	0.552078		0.737863
AT2G46240	2.75266	2.03528	2.02874
AT2G46320	0.650638	0.737766	0.591894
AT2G46430	2.52256	2.36144	2.42403
AT2G46440	0.717385	0.681333	0.439956
AT2G46495	1.79963	1.37287	1.75239
AT2G46500	0.794745	0.62568	0.571857
AT2G46510			-0.633987
AT2G46620	1.04119	0.892005	0.993311
AT2G46640	-0.869486	-0.784166	-0.980899
AT2G46660			0.653483
AT2G46740	0.573265	0.611066	0.589932
AT2G46750	1.50149	0.93488	1.30593
AT2G46780	-0.594192	-0.688724	-0.483507
AT2G46940	0.804837	0.559725	0.672745
AT2G47000	1.09035	0.600469	0.704724
AT2G47130	1.45683	1.23024	1.37664
AT2G47140	2.02733	1.80817	2.13257
AT2G47190	2.3701	1.98355	1.8091
AT2G47220	-0.623296	-0.497344	-0.555497
AT2G47485	0.629573	0.517687	0.587091
AT2G47520	1.96477	1.34253	1.5228
AT2G47550	3.12039	2.88416	3.05532
AT2G47650	1.10572	1.05011	1.18636
AT2G47730	1.3524	1.13281	1.02415
AT2G47890	0.825117	0.615791	0.712958
AT2G47910	-0.736774	-0.356057	-0.538535
AT2G47930	-0.618841
AT2G47950	0.716578		0.728386
AT3G01045	0.803273
AT3G01080	0.918826
AT3G01205			0.705967
AT3G01290	1.2535	1.06365	0.925032
AT3G01420	0.618522		0.504804
AT3G01440	-0.702315	-0.517437	-0.771525
AT3G01485			0.890532
AT3G01513	1.04304
AT3G01515			0.925319
AT3G01516	-0.615552	-0.580621
AT3G01550		-0.352181	-0.618222
AT3G01600			-0.660733
AT3G01715	0.780524
AT3G01720	0.835972	0.778213	0.976566
AT3G01820	0.610212	0.790231	0.532543
AT3G01830	3.57482	3.02311	2.55058
AT3G01960		-0.896097
AT3G01970	1.12873	1.26788	0.978378
AT3G01990	0.708709	0.818136	0.820133
AT3G02070	0.60341	0.43669	0.440673
AT3G02105			0.771731
AT3G02230	0.848404	0.538256	0.776875
AT3G02240	2.66604	2.1829	2.32524
AT3G02242	0.648316
AT3G02360	0.759617	0.625623	0.609624
AT3G02455			1.06607
AT3G02500	-0.697297	-0.969291	-0.81975
AT3G02550	0.65013
AT3G02690	-0.5371	-0.288761	-0.598042
AT3G02800	2.56731	2.08928	2.24493
AT3G02840	3.39389	2.94843	3.08085
AT3G02875	0.597449	0.670873
AT3G02880	0.909349	0.899973	0.761957
AT3G03000	0.837475	0.938521	0.964939
AT3G03020	0.835844	0.567389	1.02246
AT3G03025			1.03842
AT3G03165	1.55902	0.940218	1.82792
AT3G03190			-0.847859
AT3G03280	-0.958664		-0.725837
AT3G03440	1.11279	0.626799	0.877011
AT3G03470	-0.839982	-0.726252	-0.743143
AT3G03475			1.26221
AT3G03480	-1.40091	-0.758151	-1.29126
AT3G03500		-0.670765
AT3G03535			1.0636
AT3G03540	0.681063		1.00945
AT3G03660		0.607998	0.958314
AT3G03670	1.09241	0.863151	1.01443
AT3G03820			-0.755645
AT3G04010	1.52471	1.14243	1.1831
AT3G04070	0.61814	0.565309	0.64978
AT3G04110	1.43778	1.1311	1.05744
AT3G04200	1.53596	1.36076	0.746655
AT3G04210	0.950836	0.516809	0.765493
AT3G04220	2.29354	1.79014	1.76735
AT3G04300	0.630328	0.668842	0.65153
AT3G04320			0.770747
AT3G04420	1.2712	0.712721	0.821134
AT3G04475	0.75358	0.97474	0.862323
AT3G04530	0.636492
AT3G04620	1.37334	1.28363	1.14563
AT3G04685			0.621598
AT3G04690			0.914145
AT3G04720	1.16055	1.03252	1.15417
AT3G04860	-0.593354		-0.544445
AT3G04960	-0.644007
AT3G05050	0.663743	0.452638	0.641192
AT3G05200	0.522038	0.589638
AT3G05260	1.15061	0.877545
AT3G05360	2.39691	1.94753	2.07151
AT3G05370	0.955473	0.506336	0.695968
AT3G05390	0.769454		0.638301
AT3G05580	0.760675	0.740484	0.779192
AT3G05660	2.24297	1.82866	1.75723
AT3G05740		-0.735883
AT3G05890	-0.444562	-0.662126	-0.503522
AT3G05900	-0.867035	-0.865136	-0.795736
AT3G05905			0.716191
AT3G05980		-0.765282
AT3G06070	-0.539338	-0.653038	-0.535249
AT3G06080	-0.631296	-0.612932	-0.614592
AT3G06140	-0.656084	-0.517293
AT3G06160	-0.715754
AT3G06300	0.907707	0.636054	0.805256
AT3G06325			0.709339
AT3G06420	0.600782
AT3G06460	-0.891347	-1.178	-0.900061
AT3G06490	0.916092	1.00034
AT3G06500	0.595472		0.455001
AT3G06520	-0.623597
AT3G06750	-0.622301	-0.543092	-0.803849
AT3G06770	-0.669408	-0.578437	-0.738946
AT3G06880	-0.690382	-0.811605	-0.849387
AT3G07040	0.689484	0.600172	0.459629
AT3G07090	1.53275	1.14662	1.25158
AT3G07105			-0.756706
AT3G07195	2.72831	2.65202	2.51719
AT3G07273	0.848234	0.578004	0.514653
AT3G07315			0.790712
AT3G07340	-0.602027	-0.786753
AT3G07350	-0.840061		-0.72189
AT3G07365		0.882243	1.01124
AT3G07390	1.69155	1.40409	1.67525
AT3G07520			0.614785
AT3G07580	0.908877	0.583974	0.533134
AT3G07600	1.15558	1.02308	1.41866
AT3G07800	0.522439		0.640721
AT3G07805			0.655629
AT3G07925			0.6591
AT3G07970	1.64788	0.838613	0.686934
AT3G08365			0.74567
AT3G08405			0.645679
AT3G08640	0.817793	0.753513	0.798685
AT3G08665			0.700214
AT3G08690	0.59318	0.643324	0.434537
AT3G08710	0.955773	0.630335	0.692709
AT3G08720	0.939713	0.664815	0.563095
AT3G08760	0.515616	0.623098	0.482991
AT3G08785			0.956546
AT3G08870	1.23824	1.14854	0.889668
AT3G08970	2.88751	2.23488	2.35214
AT3G09000	0.73007	0.812879	0.727757
AT3G09010	2.7842	2.41286	2.23937
AT3G09020	1.35485	1.26472	1.14509
AT3G09160	-0.70049
AT3G09162	-0.847303	-0.763742
AT3G09270	0.96075	0.563457	0.7668
AT3G09275			0.998594
AT3G09340	2.22848	1.76303	1.66223
AT3G09350	2.26425	1.88252	1.82982
AT3G09405	2.86993	2.80949	2.64593
AT3G09440	2.06479	1.65606	1.83129
AT3G09480	1.02709	0.683082	0.838666
AT3G09490	0.829787	0.698991	1.03871
AT3G09520	3.19341	2.81171	2.52434
AT3G09600		0.619939
AT3G09795	0.708165
AT3G09830	1.65254	1.39052	1.36806
AT3G09875			0.780554
AT3G09940	1.53989	1.38312	1.75355
AT3G09985			0.980742
AT3G10000		-0.712712
AT3G10190	-0.787739
AT3G10300	1.1953	1.21347	0.952011
AT3G10500	1.2378	0.843622	1.02313
AT3G10640	0.708411	0.601085	0.426224
AT3G10720	1.19703	1.00221	1.02728
AT3G10815	0.837537	1.04163	0.693264
AT3G10840	-0.431553	-0.355317	-0.662361
AT3G10930		0.760625	0.932224
AT3G10985	0.930993	0.689539	0.867203
AT3G10986		-1.09386
AT3G11080	1.38214	1.22934	1.6592
AT3G11110	-0.877887	-0.638145
AT3G11320	0.662099		0.623116
AT3G11340	1.45447	1.05988	1.32108
AT3G11370	-0.737189		-1.03418
AT3G11402	1.7167	1.1739	1.31701
AT3G11410	-0.657264	-0.546496	-0.550621
AT3G11570	1.01767		0.877762
AT3G11820	1.38976	1.35513	1.13118
AT3G11840	2.41146	1.89223	1.92161
AT3G12040	1.64876	1.16171	1.39239
AT3G12110	-0.743869	-0.73133	-0.728708
AT3G12500	0.478665		0.698507
AT3G12510	0.903265	0.734548	0.563159
AT3G12520	-0.608071
AT3G12580	2.1418	1.65222	1.75074
AT3G12620	0.619729	0.636595	0.555506
AT3G12685	-0.596366	-0.436169	-0.683468
AT3G12740	0.882407	0.867436	0.744371
AT3G12910	2.31734	1.82285	2.11359
AT3G13050	0.785076	0.608842	0.754823
AT3G13061	-1.13245	-0.986769	-0.955234
AT3G13062	-1.01338	-0.827171	-1.05684
AT3G13065			-0.67553
AT3G13080	0.938778	0.668543	0.591473
AT3G13090	0.810437	0.587447	1.01732
AT3G13100	1.32285	0.984498	1.2015
AT3G13110	0.569794	0.591528	0.489205
AT3G13276			0.899275
AT3G13330	0.902495	0.658983	0.618123
AT3G13380	0.776261	0.53485	0.643508
AT3G13432	1.00024		1.02356
AT3G13433	0.979059	0.852558	1.18202
AT3G13437		0.957124	0.735627
AT3G13450			-0.593257
AT3G13500	1.26531		0.824012
AT3G13600	1.59241	1.18534	1.11463
AT3G13610	1.66256	0.81156	1.46875
AT3G13650	1.08555		1.1864
AT3G13750	-0.627812	-0.67154	-0.707875
AT3G13790	1.63777	1.26283	1.49088
AT3G13910	1.75455	1.75804	1.37177
AT3G13950	2.8255	2.51968	3.16284
AT3G13980		-0.659599	-0.804685
AT3G14200	1.3507	0.98516	1.27044
AT3G14225	2.48145	2.20494	2.61451
AT3G14310	0.664763	0.700538	0.73053
AT3G14470	0.415879		0.613397
AT3G14530	-0.810763	-0.794713
AT3G14620	0.756834	0.779947	0.608243
AT3G14630	1.05191
AT3G14700	0.694235	0.864315
AT3G14710	1.38916	0.988253	1.08344
AT3G14770	-0.520349		-0.607457
AT3G14810	-0.568898	-0.382238	-0.640633
AT3G14840	0.696537	0.616323	0.637361
AT3G14850	0.982185	0.876769	0.83266
AT3G15115	-0.62844	-0.595138
AT3G15300			0.661056
AT3G15340	1.13224	1.31785	1.33463
AT3G15352	0.91938	0.798579	0.853114
AT3G15356	3.37906	3.02921	2.95918
AT3G15518	3.77245	3.61059	3.59595
AT3G15534	1.09732	1.22539
AT3G15650		-0.885482
AT3G15720	-1.04941	-0.600448	-0.632002
AT3G15900	-0.592028	-0.372555	-0.491073
AT3G15990	0.693691	0.531403
AT3G16030	1.03743	0.784294	0.93065
AT3G16050	1.15552	0.900257	0.942723
AT3G16240	-0.727309	-0.604552	-0.724782
AT3G16330	2.01312	1.54131	1.43933
AT3G16390	-0.908119
AT3G16510	0.752387	0.731359	0.695956
AT3G16525	2.64282	2.36035	3.6208
AT3G16530	3.54971	3.12006	3.19285
AT3G16565	0.990681	0.892674	0.915405
AT3G16570	-0.784406	-0.465993	-0.753469
AT3G16690	-0.423233	-0.625205	-0.359249
AT3G16720	0.51011	0.711134
AT3G16860	1.04355	0.840796	0.836237
AT3G17185		-0.603892	-0.529107
AT3G17240	0.667204	0.543147	0.624646
AT3G17410	0.853587	0.770965	0.686368
AT3G17510	-0.817353	-0.708628	-0.842867
AT3G17609	0.434255	0.606727
AT3G17700	0.802942	0.797259	0.708928
AT3G17930	-0.614194	-0.36286	-0.577485
AT3G18250	3.2972	3.05113	3.28814
AT3G18320	-0.837497	-0.556507	-0.670403
AT3G18610		0.656248
AT3G18690	1.08509	0.982241	0.801548
AT3G18830	1.46174	1.34259	1.14249
AT3G18915			1.0398
AT3G18930	0.719433	0.861823	0.637981
AT3G18950	1.18143	1.05226	1.19615
AT3G19002			0.696528
AT3G19010	2.08272	1.88894	1.93037
AT3G19030	-0.660245	-0.344935	-0.768953
AT3G19130	0.836038	0.695164	0.763195
AT3G19260	1.78708	1.49093	1.65911
AT3G19270	-0.703934		-0.846777
AT3G19300	-0.603231
AT3G19320	-0.723867	-1.15315	-0.657944
AT3G19380	-0.608091
AT3G19430		-0.641938
AT3G19613			0.959477
AT3G19615	3.63052	3.33916	3.2936
AT3G19660	1.62483	1.27858	1.47574
AT3G19680	-0.747426	-0.54292	-0.701523
AT3G19700			0.942094
AT3G19800	-0.510351	-0.367236	-0.62575
AT3G19930	0.648275	0.638245	0.479161
AT3G19970	0.732458
AT3G20160	-1.12827
AT3G20360	1.58536	1.41035	1.23953
AT3G20380	0.595885		0.439126
AT3G20395	0.706298	0.93486
AT3G20410	0.925446	0.812973	0.654194
AT3G20510	1.41332	1.15998	1.30649
AT3G20820	-0.562138	-0.332545	-0.61269
AT3G20860	1.00462	0.882579	0.884897
AT3G20940	-0.508131	-0.776255
AT3G21070	0.92668	0.741588	0.759505
AT3G21080	0.812827	1.09368
AT3G21180	-0.822718
AT3G21230	1.63846	1.40731	1.38336
AT3G21240	0.817968	0.474911	0.635304
AT3G21305	3.16347	3.02973	3.25604
AT3G21320	0.823073
AT3G21330			0.714295
AT3G21351	1.798	2.10605	1.51408
AT3G21520	1.12072	1.43907	1.06133
AT3G21620		-0.735115
AT3G21630	1.8048	1.58752	1.57426
AT3G21670	-0.530005	-0.442725	-0.904333
AT3G21680		-0.841791
AT3G21700	1.63272	1.51356	1.35369
AT3G21780	1.52895	1.41201	1.26847
AT3G21781	1.28503	1.38193	1.37213
AT3G21870	-0.843216	-0.417997	-0.823815
AT3G22060	2.11086	2.0688	1.8812
AT3G22070	-0.618551		-0.563028
AT3G22121			1.08196
AT3G22150	-0.605516	-0.385096	-0.589554
AT3G22160	1.37646	1.32994	1.05134
AT3G22210			-0.662869
AT3G22235	0.639319	0.578091
AT3G22240	0.985374		0.822395
AT3G22260	1.34738	1.0321	0.781878
AT3G22275			-1.12351
AT3G22370	0.957596	0.844495	0.668145
AT3G22410		0.69735	0.73738
AT3G22640			-1.19492
AT3G22740	-0.87299	-0.783984	-0.8213
AT3G22800	1.2828	1.00713	1.29001
AT3G22890	1.01027	0.945572	0.959332
AT3G22942	0.803825	0.72948	0.895834
AT3G22950	0.68036	0.457349	0.494285
AT3G23090		-0.776868
AT3G23120	1.69279	1.5247	1.64362
AT3G23123	0.881118	0.788258	0.833446
AT3G23150	0.779822	0.851548	0.838437
AT3G23170	0.561024	0.598863	0.502754
AT3G23175	0.502385		0.650045
AT3G23190	0.472224		0.678048
AT3G23220	0.745699	0.927066
AT3G23230	3.34682	2.79568	2.4891
AT3G23240	0.73338	0.790757	0.704852
AT3G23250	1.67992	1.70328	1.5205
AT3G23260	0.683377	0.579558	0.916975
AT3G23440		0.719215
AT3G23470	-0.633174	-0.658414
AT3G23550	2.04066	1.97759	1.63952
AT3G23570	0.585316	0.59813	0.518661
AT3G23605	1.11536	0.686753	0.917184
AT3G23700	-0.640951	-0.489504	-0.60406
AT3G23740		-0.630768
AT3G23750	-0.65899	-0.576158	-0.665078
AT3G23760	-0.658832	-0.53997	-0.705141
AT3G24090	1.68071	1.13126	1.09109
AT3G24110	-0.591409
AT3G24170	0.65683	0.538206	0.447014
AT3G24180	0.596772	0.501176	0.441691
AT3G24190	-0.57812	-0.409709	-0.73863
AT3G24300	-0.545132	-0.60318	-0.896424
AT3G24420	1.23545	1.1824	1.14032
AT3G24460	-0.608282		-0.720131
AT3G24500	2.04062	1.52376	1.57845
AT3G24503	0.954464	0.735053	0.788922
AT3G24520	-0.674383
AT3G24540	1.13099	0.967016	1.1185
AT3G24560			-0.637526
AT3G25012	0.737698
AT3G25070	0.84573	0.67544	0.706459
AT3G25110	-0.433632	-0.627191
AT3G25230	0.730939	0.414013	0.57075
AT3G25250	2.21635	1.17874	1.47928
AT3G25290	-0.578123	-0.748026
AT3G25610	2.1278	1.83585	1.82932
AT3G25670		-0.686447	-0.807391
AT3G25690	-0.611011	-0.527368	-0.653412
AT3G25730	0.862297	0.736333	1.0731
AT3G25760	1.22835	1.06858	0.847831
AT3G25770	0.746814	0.725867
AT3G25780	1.03914	0.684529	0.709545
AT3G25790		-0.756257
AT3G25880			-0.725575
AT3G25882		0.871595	0.675706
AT3G25900	1.00574	0.549228	0.830664
AT3G25930		-0.676125	-0.508399
AT3G26020	0.887514	0.671578	0.759126
AT3G26090	0.680892	0.501124	0.655273
AT3G26120		0.686966
AT3G26200	1.13506	1.11014	0.833831
AT3G26210	1.61847	1.37616	1.61924
AT3G26230	0.753837	0.51739	0.709305
AT3G26280	-0.716033	-0.574281	-0.535182
AT3G26500	2.93346	2.72857	2.40452
AT3G26512	0.906093		0.716188
AT3G26520	-0.89334	-0.619455	-0.831376
AT3G26630	-0.709		-0.745814
AT3G26670	1.03681	1.0013	0.757057
AT3G26680	1.18988	1.05433	0.960842
AT3G26740	-0.733155	-0.464272	-0.793538
AT3G26820			0.960255
AT3G26830	4.53127	4.05951	4.38773
AT3G26840	1.09948	1.01176	0.964311
AT3G26910	1.52068	1.35533	1.22296
AT3G26980	0.812247	0.537322	0.548524
AT3G27070	0.70434
AT3G27330	0.651652	0.462624	0.813091
AT3G27415	0.620444
AT3G27950	1.78744	1.44461	1.8175
AT3G28007	0.944467		0.830133
AT3G28130	-0.466408		-0.632895
AT3G28210	2.96332	2.29005	2.54243
AT3G28340	0.976405	0.938814	1.05336
AT3G28370	-0.589404		-0.512125
AT3G28450	0.921026	0.737984	0.675435
AT3G28480	0.626974	0.626561	0.610621
AT3G28580	2.05792	1.53171	2.02631
AT3G28770	0.738338
AT3G28850	1.76149	1.54737	1.42302
AT3G28890		0.940808	0.689694
AT3G28910	0.736754	0.470978
AT3G28930	2.7332	2.54606	2.30068
AT3G28940	1.37387	1.22206	1.25578
AT3G29000	1.85868	1.27945	1.41876
AT3G29034	1.6308	1.29641	1.64687
AT3G29075	0.68428	0.578122	0.5303
AT3G29370			-0.666424
AT3G29400	1.13063	1.1174	1.04391
AT3G29410	-0.66412	-0.725492
AT3G29430	-0.691939
AT3G29635	-0.727529
AT3G29670	-0.724902	-0.84108	-0.695936
AT3G29680		-0.642722
AT3G29780	-1.01268	-0.635911	-0.804539
AT3G30340	0.622714	0.667897
AT3G41762			0.606256
AT3G42180	0.986437	0.613327	1.17192
AT3G43250	2.68754	2.38365	2.31334
AT3G43430	0.448286	0.67644	0.421559
AT3G43850	-1.30727	-1.36022	-1.47983
AT3G44020	-0.521295	-0.383509	-0.608268
AT3G44190	1.19375	0.753887	1.09896
AT3G44400	0.950948	0.509403	0.680289
AT3G44540		-0.592401
[truncated: 1,762 more rows]
